# Supplementary material for: Base-promoted ring-closing carbonyl–allene metathesis for the synthesis of 2,4-disubstituted pyrroles
Source: Royal Society of Chemistry journal article supplement (doi:10.1039/c8gc01675e), 2018-01-01

# Base-promoted ring-closing carbonyl–allene metathesis for the synthesis of 2,4-disubstituted Pyrroles

Guolin Cheng,\* Weiwei Lv, Lulu Xue

College of Materials Science & Engineering, Huaqiao University, Xiamen 361021, China

## Table of Contents

|                                                                                                                   |     |
|-------------------------------------------------------------------------------------------------------------------|-----|
| <b>1. General Information</b>                                                                                     | S2  |
| <b>2. General Procedure for Synthesis of Preparation of <i>N</i>-propargyl <math>\beta</math>-enaminones 1a-v</b> | S3  |
| <b>3. General Procedure for Synthesis of 2a-v</b>                                                                 | S3  |
| <b>4. Procedure for Gram-Scale Synthesis of 2a</b>                                                                | S8  |
| <b>5. Procedure for Synthesis of 4 and 5</b>                                                                      | S8  |
| <b>6. <math>^1\text{H}</math> and <math>^{13}\text{C}</math> NMR Spectra</b>                                      | S10 |

## 1. General Information

All reagents were used directly without further purification. Silica gel was purchased from Qing Dao Hai Yang Chemical Industry Co.  $^1\text{H}$  and  $^{13}\text{C}$  NMR spectra were measured on a 400 MHz Bruker spectrometer ( $^1\text{H}$  400 MHz,  $^{13}\text{C}$ 100 MHz) or a 500 MHz Bruker spectrometer ( $^1\text{H}$  500 MHz,  $^{13}\text{C}$ 125 MHz) using  $\text{CDCl}_3$  or  $\text{DMSO-D}_6$  as the solvent with tetramethylsilane (TMS) as the internal standard at room temperature. HRMS-ESI spectra were obtained on Agilent UPLC1290-QTOF6545. The products listed below were determined by  $^1\text{H}$ ,  $^{13}\text{C}$  NMR. PE is petroleum ether (60–90 °C).

## 2. General Procedure for Synthesis of Preparation of *N*-propargyl $\beta$ -enaminones 1a-v.<sup>1</sup>

A mixture of propargylamine (1.1 g, 20 mmol), propynones (20 mmol), and CH<sub>3</sub>OH (50 mL) was stirred at room temperature under air overnight. After propynones was exhausted completely (monitored by TLC), the solvent was evaporated and the residue was purified by chromatography (silica gel, 5% EtOAc in PE) to give **1**.

## 3. General Procedure for Synthesis of 2a-v

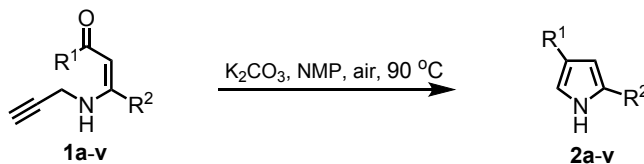

To a 15 mL Schlenk tube equipped with a magnetic stir bar were added K<sub>2</sub>CO<sub>3</sub> (13.8 mg, 0.1 mmol), enaminones **1** (0.1 mmol), and NMP (1.0 mL). The solution was stirred at 90 °C under air atmosphere for 12 h. After the reaction finished, the reaction system was directly purified by column chromatography (ethyl acetate/PE = 1/50) to yield the desired products.

### Spectroscopic Data for Products

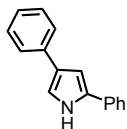

#### 2,4-diphenyl-1*H*-pyrrole (**2a**)<sup>2</sup>

White solid (20.4 mg, 93% yield); m.p. 177-179 °C; <sup>1</sup>H NMR (400 MHz, DMSO)  $\delta$  11.44 (s, 1H), 7.69 (d,  $J$  = 7.8 Hz, 2H), 7.62 (d,  $J$  = 7.7 Hz, 2H), 7.35 (m, 5H), 7.15 (m, 2H), 6.96 (s, 1H); <sup>13</sup>C NMR (100 MHz, DMSO)  $\delta$  136.2, 133.1, 132.7, 129.1, 129.0, 126.1, 125.5, 125.2, 124.9, 123.9, 117.0, 103.6.

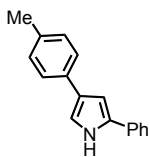

#### 2-phenyl-4-(*p*-tolyl)-1*H*-pyrrole (**2b**)<sup>2</sup>

White solid (21.0 mg, 90% yield); m.p. 194-196 °C; <sup>1</sup>H NMR (400 MHz, CDCl<sub>3</sub>)  $\delta$  8.40 (s, 1H), 7.48 (dd,  $J$  = 17.2, 7.9 Hz, 4H), 7.38 (t,  $J$  = 7.6 Hz, 2H), 7.22 (d,  $J$  = 7.4 Hz, 1H), 7.17 (d,  $J$  = 7.8 Hz, 2H), 7.10 (s, 1H), 6.80 (s, 1H), 2.36 (s, 3H); <sup>13</sup>C NMR (100 MHz, CDCl<sub>3</sub>)  $\delta$  135.2, 132.9, 132.5, 129.3, 128.9, 126.6, 126.4, 125.1, 123.8, 115.2, 103.9, 21.0.

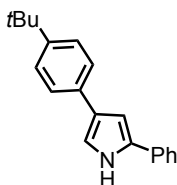

#### 4-(4-(*tert*-butyl)phenyl)-2-phenyl-1*H*-pyrrole (**2c**)

White solid (17.6 mg, 64% yield); m.p. 165-167 °C; <sup>1</sup>H NMR (400 MHz, CDCl<sub>3</sub>) δ 8.35 (s, 1H), 7.53 – 7.45 (m, 4H), 7.41 – 7.33 (m, 4H), 7.21 (dd, *J* = 10.3, 3.7 Hz, 1H), 7.09 – 7.01 (m, 1H), 6.80 (d, *J* = 1.6 Hz, 1H), 1.34 (d, *J* = 2.7 Hz, 9H); <sup>13</sup>C NMR (100 MHz, CDCl<sub>3</sub>) δ 148.6, 132.8, 132.7, 132.5, 128.9, 126.5, 126.3, 125.5, 124.9, 123.7, 115.4, 104.0, 34.4, 31.3; HRMS (ESI) calcd for C<sub>20</sub>H<sub>22</sub>N [M+H]<sup>+</sup> 276.1747, found: 276.1754.

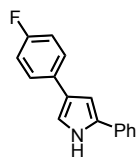

#### 4-(4-fluorophenyl)-2-phenyl-1*H*-pyrrole (2d)<sup>2</sup>

White solid (22.3 mg, 94% yield); m.p. 191-194 °C; <sup>1</sup>H NMR (400 MHz, DMSO) δ 11.44 (s, 1H), 7.69 (d, *J* = 7.9 Hz, 2H), 7.64 (dd, *J* = 7.5, 5.7 Hz, 2H), 7.38 (t, *J* = 7.4 Hz, 2H), 7.32 (s, 1H), 7.22 – 7.12 (m, 3H), 6.93 (s, 1H); <sup>13</sup>C NMR (100 MHz, DMSO) δ 160.7 (d, *J* = 241.1 Hz), 133.1, 132.8, 132.8, 129.2, 126.5 (d, *J* = 7.6 Hz), 126.2, 124.3, 123.9, 117.0, 115.7 (d, *J* = 21.2 Hz), 103.7; <sup>19</sup>F NMR (376 MHz, DMSO) δ -118.2.

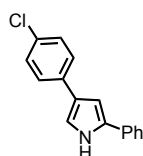

#### 4-(4-chlorophenyl)-2-phenyl-1*H*-pyrrole (2e)<sup>2</sup>

White solid (21.0 mg, 83% yield); m.p. 206-208 °C; <sup>1</sup>H NMR (400 MHz, CDCl<sub>3</sub>) δ 8.44 (s, 1H), 7.48 (t, *J* = 7.4 Hz, 4H), 7.38 (t, *J* = 7.6 Hz, 2H), 7.31 (d, *J* = 8.4 Hz, 2H), 7.24 (t, *J* = 7.3 Hz, 1H), 7.10 (s, 1H), 6.77 (s, 1H); <sup>13</sup>C NMR (100 MHz, CDCl<sub>3</sub>) δ 134.0, 133.3, 132.2, 131.2, 128.9, 128.7, 126.6, 126.3, 125.5, 123.9, 115.6, 103.8.

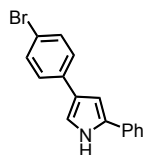

#### 4-(4-bromophenyl)-2-phenyl-1*H*-pyrrole (2f)<sup>3</sup>

White solid (23.3 mg, 78% yield); m.p. 188-191 °C; <sup>1</sup>H NMR (400 MHz, DMSO) δ 11.51 (s, 1H), 7.68 (d, *J* = 7.9 Hz, 2H), 7.60 – 7.55 (m, 2H), 7.49 (d, *J* = 7.4 Hz, 2H), 7.42 – 7.35 (m, 3H), 7.18 (t, *J* = 7.3 Hz, 1H), 6.97 (s, 1H); <sup>13</sup>C NMR (100 MHz, DMSO) δ 135.5, 132.9, 131.8, 129.1, 126.8, 126.2, 123.9, 123.9, 118.0, 117.5, 103.6.

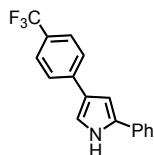

#### 2-phenyl-4-(4-(trifluoromethyl)phenyl)-1*H*-pyrrole (2g)

White solid (20.1 mg, 70% yield); m.p. 201-208 °C; <sup>1</sup>H NMR (400 MHz, DMSO) δ 11.59 (s, 1H), 7.80 (d, *J* = 7.1 Hz, 2H), 7.65 (dd, *J* = 20.9, 7.2 Hz, 4H), 7.50 (s, 1H), 7.36 (t, *J* = 6.7 Hz, 2H), 7.18 (t, *J* = 6.6 Hz, 1H), 7.04 (s, 1H); <sup>13</sup>C NMR (100 MHz, DMSO) δ 140.4, 133.3, 132.8, 129.2, 126.4, 125.9 (q, *J* = 4.4 Hz), 125.5, 125.1, 124.8 (q, *J* = 20.8 Hz), 124.0, 123.8, 118.6, 103.9; <sup>19</sup>F NMR (376 MHz, DMSO) δ -60.49; HRMS (ESI) calcd for C<sub>17</sub>H<sub>13</sub>F<sub>3</sub>N [M+H]<sup>+</sup> 288.0995, found: 288.0996.

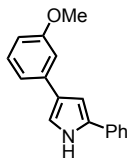

#### 4-(4-methoxyphenyl)-2-phenyl-1H-pyrrole (2h)

White solid (19.9 mg, 80% yield); m.p. 117-118 °C <sup>1</sup>H NMR (400 MHz, CDCl<sub>3</sub>) δ 8.44 (s, 1H), 7.50 (d, *J* = 7.8 Hz, 2H), 7.38 (t, *J* = 7.6 Hz, 2H), 7.30 – 7.20 (m, 2H), 7.17 (d, *J* = 7.6 Hz, 1H), 7.11 (s, 2H), 6.84 – 6.72 (m, 2H), 3.85 (s, 3H); <sup>13</sup>C NMR (100 MHz, CDCl<sub>3</sub>) δ 159.9, 136.9, 133.0, 132.4, 129.6, 128.9, 126.5, 123.8, 117.8, 115.7, 111.1, 110.9, 104.0, 55.2; HRMS (ESI) calcd for C<sub>17</sub>H<sub>16</sub>NO [M+H]<sup>+</sup> 250.1226, found: 250.1232.

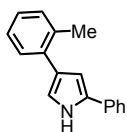

#### 2-phenyl-4-(*o*-tolyl)-1H-pyrrole (2i)<sup>2</sup>

White solid (18.0 mg, 77% yield); m.p. 110-113 °C; <sup>1</sup>H NMR (400 MHz, CDCl<sub>3</sub>) δ 8.39 (s, 1H), 7.52 – 7.45 (m, 2H), 7.44 – 7.32 (m, 3H), 7.27 – 7.13 (m, 4H), 6.90 (dd, *J* = 2.4, 1.6 Hz, 1H), 6.68 (dd, *J* = 2.5, 1.6 Hz, 1H), 2.46 (s, 3H); <sup>13</sup>C NMR (100 MHz, CDCl<sub>3</sub>) δ 135.5, 135.2, 132.5, 131.8, 130.5, 129.1, 128.9, 126.3, 126.1, 126.0, 125.8, 123.7, 117.7, 106.9, 21.3.

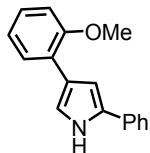

#### 4-(2-methoxyphenyl)-2-phenyl-1H-pyrrole (2j)

Colorless oil (17.7 mg, 71% yield); <sup>1</sup>H NMR (400 MHz, CDCl<sub>3</sub>) δ 8.44 (s, 1H), 7.59 (d, *J* = 7.6 Hz, 1H), 7.49 (d, *J* = 8.0 Hz, 2H), 7.35 (t, *J* = 7.5 Hz, 3H), 7.24 – 7.14 (m, 2H), 7.02 – 6.89 (m, 3H), 3.89 (s, 3H); <sup>13</sup>C NMR (100 MHz, CDCl<sub>3</sub>) δ 156.1, 132.6, 131.8, 128.8, 127.8, 126.5, 126.2, 124.2, 123.8, 122.0, 120.7, 119.0, 111.1, 105.5, 55.3; HRMS (ESI) calcd for C<sub>17</sub>H<sub>16</sub>NO [M+H]<sup>+</sup> 250.1226, found: 250.1233.

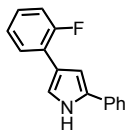

#### 4-(2-fluorophenyl)-2-phenyl-1H-pyrrole (2k)

White solid (17.8 mg, 75% yield); m.p. 104-106 °C; <sup>1</sup>H NMR (400 MHz, DMSO) δ 11.58 (s, 1H), 7.74 – 7.68 (m, 3H), 7.39 (t, *J* = 7.5 Hz, 2H), 7.32 (s, 1H), 7.23 – 7.19 (m, 4H), 7.01 (s, 1H); <sup>13</sup>C NMR (100 MHz, DMSO) δ 159.3 (d, *J* = 245.3 Hz), 132.9, 132.4, 129.2, 128.1 (d, *J* = 4.9 Hz), 126.9 (d, *J* = 8.4 Hz), 126.4, 125.0 (d, *J* = 3.2 Hz), 124.0, 123.6 (d, *J* = 12.9 Hz), 119.5 (d, *J* = 9.7 Hz), 118.7, 116.3 (d, *J* = 22.3 Hz), 104.9 (d, *J* = 3.1 Hz); <sup>19</sup>F NMR (376 MHz, CDCl<sub>3</sub>) δ -115.08; HRMS (ESI) calcd for C<sub>16</sub>H<sub>13</sub>FN [M+H]<sup>+</sup> 238.1027, found: 238.1035.

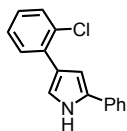

#### 4-(2-chlorophenyl)-2-phenyl-1H-pyrrole (2l)

White solid (15.2 mg, 60% yield); m.p. 108-110 °C; <sup>1</sup>H NMR (400 MHz, CDCl<sub>3</sub>) δ 8.52 (s, 1H), 7.52 (t, *J* = 7.6 Hz, 3H), 7.46 – 7.35 (m, 3H), 7.30 – 7.20 (m, 3H), 7.15 (t, *J* = 7.5 Hz, 1H), 6.84 (s, 1H); <sup>13</sup>C NMR (100 MHz, CDCl<sub>3</sub>) δ 134.3, 132.3, 132.0, 131.7, 130.3, 130.1, 128.9, 126.9, 126.7, 126.1, 123.9, 123.3, 118.8, 106.7; HRMS (ESI) calcd for C<sub>16</sub>H<sub>13</sub>ClN [M+H]<sup>+</sup> 254.0731, found: 254.0734.

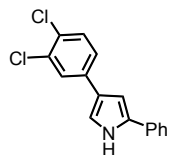

#### 4-(3,4-dichlorophenyl)-2-phenyl-1H-pyrrole (2m)

White solid (20.1 mg, 70% yield); m.p. 123-124 °C; <sup>1</sup>H NMR (400 MHz, CDCl<sub>3</sub>) δ 8.50 (s, 1H), 7.63 (s, 1H), 7.50 (d, *J* = 8.0 Hz, 2H), 7.44 – 7.34 (m, 4H), 7.25 (t, *J* = 6.8 Hz, 1H), 7.11 (s, 1H), 6.75 (s, 1H); <sup>13</sup>C NMR (100 MHz, CDCl<sub>3</sub>) δ 135.7, 133.5, 132.5, 132.0, 130.4, 129.0, 129.0, 126.8, 126.7, 124.3, 124.3, 123.9, 115.9, 103.7; HRMS (ESI) calcd for C<sub>16</sub>H<sub>12</sub>Cl<sub>2</sub>N [M+H]<sup>+</sup> 288.0341, found: 288.0349.

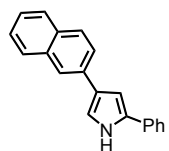

#### 4-(naphthalen-2-yl)-2-phenyl-1H-pyrrole (2n)

White solid (22.1 mg, 82% yield); m.p. 229-230 °C; <sup>1</sup>H NMR (400 MHz, CDCl<sub>3</sub>) δ 8.49 (s, 1H), 7.99 (s, 1H), 7.82 (t, *J* = 8.9 Hz, 3H), 7.76 – 7.69 (m, 1H), 7.55 (d, *J* = 7.4 Hz, 2H), 7.47-7.38 (m, 4H), 7.26 (d, *J* = 5.2 Hz, 2H), 6.96 (s, 1H); <sup>13</sup>C NMR (100 MHz, CDCl<sub>3</sub>) δ 134.0, 133.3, 132.9, 132.4, 132.0, 128.9, 128.1, 127.6, 127.6, 126.6, 126.5, 126.0, 124.9, 124.5, 123.9, 122.6, 115.9, 104.1; HRMS (ESI) calcd for C<sub>20</sub>H<sub>16</sub>N [M+H]<sup>+</sup> 270.1277, found: 270.1285.

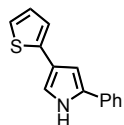

#### 2-phenyl-4-(thiophen-2-yl)-1H-pyrrole (2o)

White solid (15.3 mg, 68% yield); m.p. 155-156 °C; <sup>1</sup>H NMR (400 MHz, CDCl<sub>3</sub>) δ 8.35 (s, 1H), 7.47 (d, *J* = 7.6 Hz, 2H), 7.37 (t, *J* = 7.7 Hz, 2H), 7.23 (dd, *J* = 8.3, 6.4 Hz, 1H), 7.10 (dd, *J* = 9.5, 4.0 Hz, 2H), 7.01 (dd, *J* = 8.7, 4.8 Hz, 2H), 6.70 (s, 1H); <sup>13</sup>C NMR (100 MHz, CDCl<sub>3</sub>) δ 139.0, 132.9, 132.1, 128.9, 127.4, 126.6, 123.9, 121.9, 121.3, 120.5, 115.5, 104.5; HRMS (ESI) calcd for C<sub>14</sub>H<sub>12</sub>NS [M+H]<sup>+</sup> 226.0685, found: 226.0688.

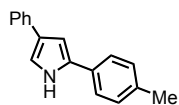

#### 4-phenyl-2-(p-tolyl)-1H-pyrrole (2p)<sup>2</sup>

White solid (20.0 mg, 86% yield); m.p. 205-207 °C; <sup>1</sup>H NMR (400 MHz, DMSO) δ 11.35 (s, 1H), 7.58 (t, *J* = 8.3 Hz, 4H), 7.36 – 7.27 (m, 3H), 7.18 (d, *J* = 7.8 Hz, 2H), 7.12 (t, *J* = 7.1 Hz, 1H), 6.88 (s, 1H), 2.30 (s, 3H); <sup>13</sup>C NMR (100 MHz, DMSO) δ 136.2, 135.2, 132.8, 130.4, 129.7, 128.9, 125.4, 125.0, 124.8, 123.8, 116.6, 103.0, 21.1.

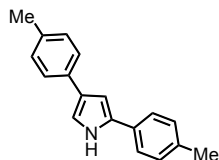

### 2,4-di-*p*-tolyl-1*H*-pyrrole(2q)<sup>3</sup>

White solid (15.6 mg, 63% yield); m.p. 203-204 °C <sup>1</sup>H NMR (400 MHz, DMSO) δ 11.29 (s, 1H), 7.56 (d, *J* = 7.7 Hz, 2H), 7.48 (d, *J* = 7.6 Hz, 2H), 7.23 (s, 1H), 7.17 (d, *J* = 7.8 Hz, 2H), 7.12 (d, *J* = 7.8 Hz, 2H), 6.84 (s, 1H), 2.29 (s, 3H), 2.28 (s, 3H); <sup>13</sup>C NMR (100 MHz, DMSO) δ 135.2, 134.3, 133.4, 132.6, 130.5, 129.7, 129.5, 125.0, 124.7, 123.8, 116.1, 102.9, 21.1, 21.1.

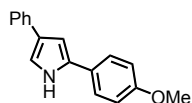

### 2-(4-methoxyphenyl)-4-phenyl-1*H*-pyrrole (2r)<sup>2</sup>

White solid (17.9 mg, 72% yield); m.p. 212-213 °C; <sup>1</sup>H NMR (400 MHz, CDCl<sub>3</sub>) δ 8.34 (s, 1H), 7.60 – 7.54 (m, 2H), 7.47 – 7.43 (m, 2H), 7.35 (t, *J* = 7.7 Hz, 2H), 7.19 (t, *J* = 7.4 Hz, 1H), 7.13 – 7.08 (m, 1H), 6.98 – 6.90 (m, 2H), 6.74 – 6.70 (m, 1H), 3.84 (s, 3H); <sup>13</sup>C NMR (100 MHz, CDCl<sub>3</sub>) δ 158.4, 135.6, 133.1, 128.6, 126.5, 125.6, 125.5, 125.3, 125.1, 114.8, 114.4, 103.0, 55.3.

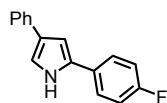

### 2-(4-fluorophenyl)-4-phenyl-1*H*-pyrrole (2s)<sup>2</sup>

White solid (18.5 mg, 78% yield); m.p. 174-176 °C; <sup>1</sup>H NMR (400 MHz, CDCl<sub>3</sub>) δ 8.33 (s, 1H), 7.55 (d, *J* = 7.1 Hz, 2H), 7.45 (s, 2H), 7.35 (t, *J* = 7.3 Hz, 2H), 7.20 (t, *J* = 7.2 Hz, 1H), 7.14 – 7.01 (m, 3H), 6.74 (s, 1H); <sup>13</sup>C NMR (100 MHz, CDCl<sub>3</sub>) δ 161.6 (d, *J* = 245.8 Hz), 135.4, 132.3, 128.9 (d, *J* = 3.3 Hz), 128.7, 126.6, 125.8, 125.5 (d, *J* = 7.9 Hz), 125.2, 115.9 (d, *J* = 21.8 Hz), 115.5, 103.9; <sup>19</sup>F NMR (376 MHz, CDCl<sub>3</sub>) δ -115.7.

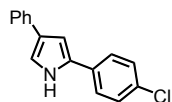

### 2-(4-chlorophenyl)-4-phenyl-1*H*-pyrrole (2t)<sup>2</sup>

White solid (17.2 mg, 68% yield); m.p. 186-187 °C; <sup>1</sup>H NMR (400 MHz, CDCl<sub>3</sub>) δ 8.39 (s, 1H), 7.55 (d, *J* = 7.3 Hz, 2H), 7.43 (d, *J* = 8.1 Hz, 2H), 7.35 (d, *J* = 7.8 Hz, 4H), 7.21 (t, *J* = 7.3 Hz, 1H), 7.14 (s, 1H), 6.80 (s, 1H); <sup>13</sup>C NMR (100 MHz, CDCl<sub>3</sub>) δ 135.2, 132.0, 131.9, 131.0, 129.1, 128.6, 126.8, 125.8, 125.2, 125.0, 115.8, 104.4.

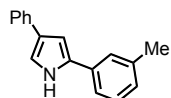

### 4-phenyl-2-(*m*-tolyl)-1*H*-pyrrole (2u)<sup>4</sup>

White solid (19.1 mg, 82% yield); m.p. 144-146 °C; <sup>1</sup>H NMR (400 MHz, CDCl<sub>3</sub>) δ 8.41 (s, 1H), 7.65 – 7.51 (m, 2H), 7.37 – 7.24 (m, 5H), 7.19 (t, *J* = 7.4 Hz, 1H), 7.15 – 7.09 (m, 1H), 7.05 (d, *J* = 7.1 Hz, 1H), 6.81 (dd, *J* = 2.5, 1.7 Hz, 1H), 2.39 (s, 3H); <sup>13</sup>C NMR (100 MHz, CDCl<sub>3</sub>) δ 138.5, 135.5, 133.2, 132.4, 128.8, 128.6, 127.3, 126.5, 125.6, 125.1, 124.6, 120.9, 115.3, 103.8, 21.5.

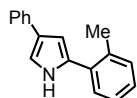

#### 4-phenyl-2-(*o*-tolyl)-1H-pyrrole (**2v**)<sup>4</sup>

White solid (15.1 mg, 65% yield); m.p. 81-84 °C; <sup>1</sup>H NMR (400 MHz, CDCl<sub>3</sub>) δ 8.24 (s, 1H), 7.57 (d, *J* = 7.5 Hz, 2H), 7.36 (dt, *J* = 12.7, 4.7 Hz, 3H), 7.30 – 7.11 (m, 5H), 6.64 (s, 1H), 2.50 (s, 3H); <sup>13</sup>C NMR (100 MHz, CDCl<sub>3</sub>) δ 135.6, 135.1, 132.5, 132.3, 131.0, 128.6, 127.9, 127.0, 126.0, 125.8, 125.6, 125.1, 114.6, 106.8, 21.2.

#### 4. Procedure for Gram-Scale Synthesis of **2a**

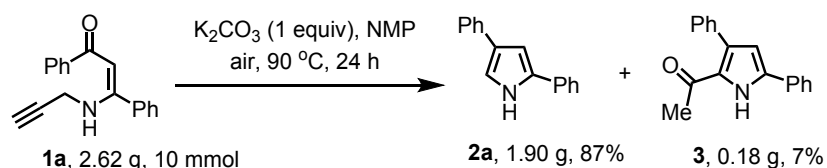

K<sub>2</sub>CO<sub>3</sub> (1.38 g, 10 mmol) was added to a solution of enaminone **1a** (2.62 g, 10 mmol) in NMP (50 mL). The solution was stirred at 90 °C under air atmosphere for 24 h. After the reaction finished, the reaction system was quenched by water (200 mL), and extracted with Et<sub>2</sub>O (5 x 20 mL). The combined Et<sub>2</sub>O extracts were dried over Na<sub>2</sub>SO<sub>4</sub> and concentrated. Then solvent was evaporated and the residue was purified by chromatography (ethyl acetate/PE = 1/50) to yield **2a** (1.9 g, 87%) and **3** (0.18 g, 7% yield).

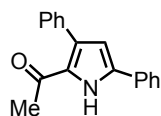

#### 1-(3,5-diphenyl-1H-pyrrol-2-yl)ethan-1-one (**3**)

White solid; m.p. 90-91 °C; <sup>1</sup>H NMR (500 MHz, CDCl<sub>3</sub>) δ 9.72 (s, 1H), 7.63 (d, *J* = 7.4 Hz, 2H), 7.48 – 7.30 (m, 8H), 6.56 (d, *J* = 3.0 Hz, 1H), 2.09 (s, 3H); <sup>13</sup>C NMR (125 MHz, CDCl<sub>3</sub>) δ 188.6, 136.2, 136.1, 134.3, 130.7, 129.7, 129.3, 129.1, 128.2, 128.2, 127.7, 125.0, 110.8, 27.5; HRMS (ESI) calcd for C<sub>18</sub>H<sub>16</sub>NO [M+H]<sup>+</sup> 262.1226, found: 262.1227.

#### 5. Procedure for Synthesis of **4** and **5**

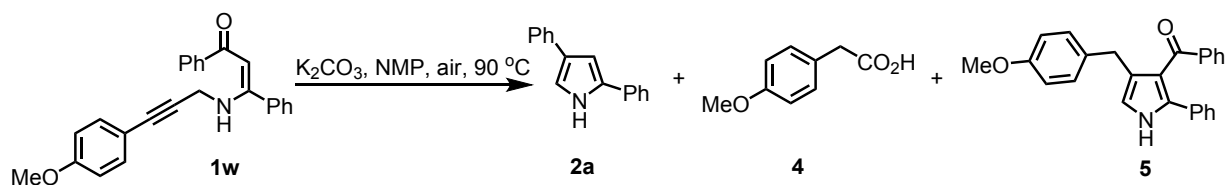

K<sub>2</sub>CO<sub>3</sub> (27.6 mg, 0.2 mmol) and enaminone **1w** (73.4 mg, 0.2 mmol) were added in NMP (2.0 mL). The solution was stirred at 90 °C under air atmosphere for 24 h. After the reaction finished, the reaction system was quenched by



1M HCl (10 mL), and extracted with Et<sub>2</sub>O (5 x 5 mL). The combined Et<sub>2</sub>O extracts were dried over Na<sub>2</sub>SO<sub>4</sub> and concentrated. Then solvent was evaporated and the residue was purified by chromatography (ethyl acetate/AcOH PE = 1/1/50 to 1/1/10) to yield **2a** (13.4 mg, 31%), **4** (8.0 mg, 24% yield), and **5** (36.7 mg, 50% yield).

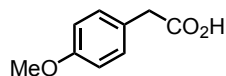

#### 2-(4-methoxyphenyl)acetic acid (**4**)

<sup>1</sup>H NMR (500 MHz, CDCl<sub>3</sub>) δ 11.50 (s, 1H), 7.18 (d, *J* = 8.4 Hz, 2H), 6.85 (d, *J* = 8.6 Hz, 2H), 3.77 (s, 3H), 3.56 (s, 2H); <sup>13</sup>C NMR (125 MHz, CDCl<sub>3</sub>) δ 178.5, 158.7, 130.3, 125.2, 114.0, 55.2, 40.1.

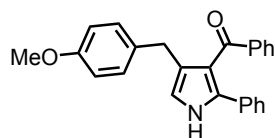

#### (4-(4-methoxybenzyl)-2-phenyl-1H-pyrrol-3-yl)(phenyl)methanone (**5**)

White solid; m.p. 72-75 °C; <sup>1</sup>H NMR (500 MHz, CDCl<sub>3</sub>) δ 8.61 (s, 1H), 7.59 (dd, *J* = 8.2, 1.1 Hz, 2H), 7.26 (t, *J* = 7.4, 7.4 Hz, 1H), 7.14 – 7.05 (m, 9H), 6.78 – 6.74 (m, 2H), 6.38 (d, *J* = 2.4 Hz, 1H), 3.89 (s, 2H), 3.74 (s, 3H); <sup>13</sup>C NMR (126 MHz, CDCl<sub>3</sub>) δ 194.8, 157.6, 139.3, 136.4, 133.4, 132.1, 131.7, 129.8, 129.7, 128.2, 128.0, 127.6, 127.3, 127.3, 119.6, 117.6, 113.6, 55.2, 31.5; HRMS (ESI) calcd for C<sub>25</sub>H<sub>22</sub>NO<sub>2</sub> [M+H]<sup>+</sup> 368.1645, found: 368.1651.

#### Reference:

1. K. Goutham, D. Ashok Kumar, S. Suresh, B. Sridhar, R. Narendar and G. V. Karunakar, *J. Org. Chem.* 2015, **80**, 11162.
2. F. Chen, T. Shen, Y. Cui and N. Jiao, *Org. Lett.*, 2012, **14**, 4926.
3. M. Adib, N. Ayashi, F. Heidari and P. Mirzaei, *Synlett*, 2016, **27**, 1738.
4. R. Umeda, T. Mashino and Y. Nishiyama, *Tetrahedron*, 2014, **70**, 4395.

# <sup>1</sup>H and <sup>13</sup>C NMR Spectra of 2a

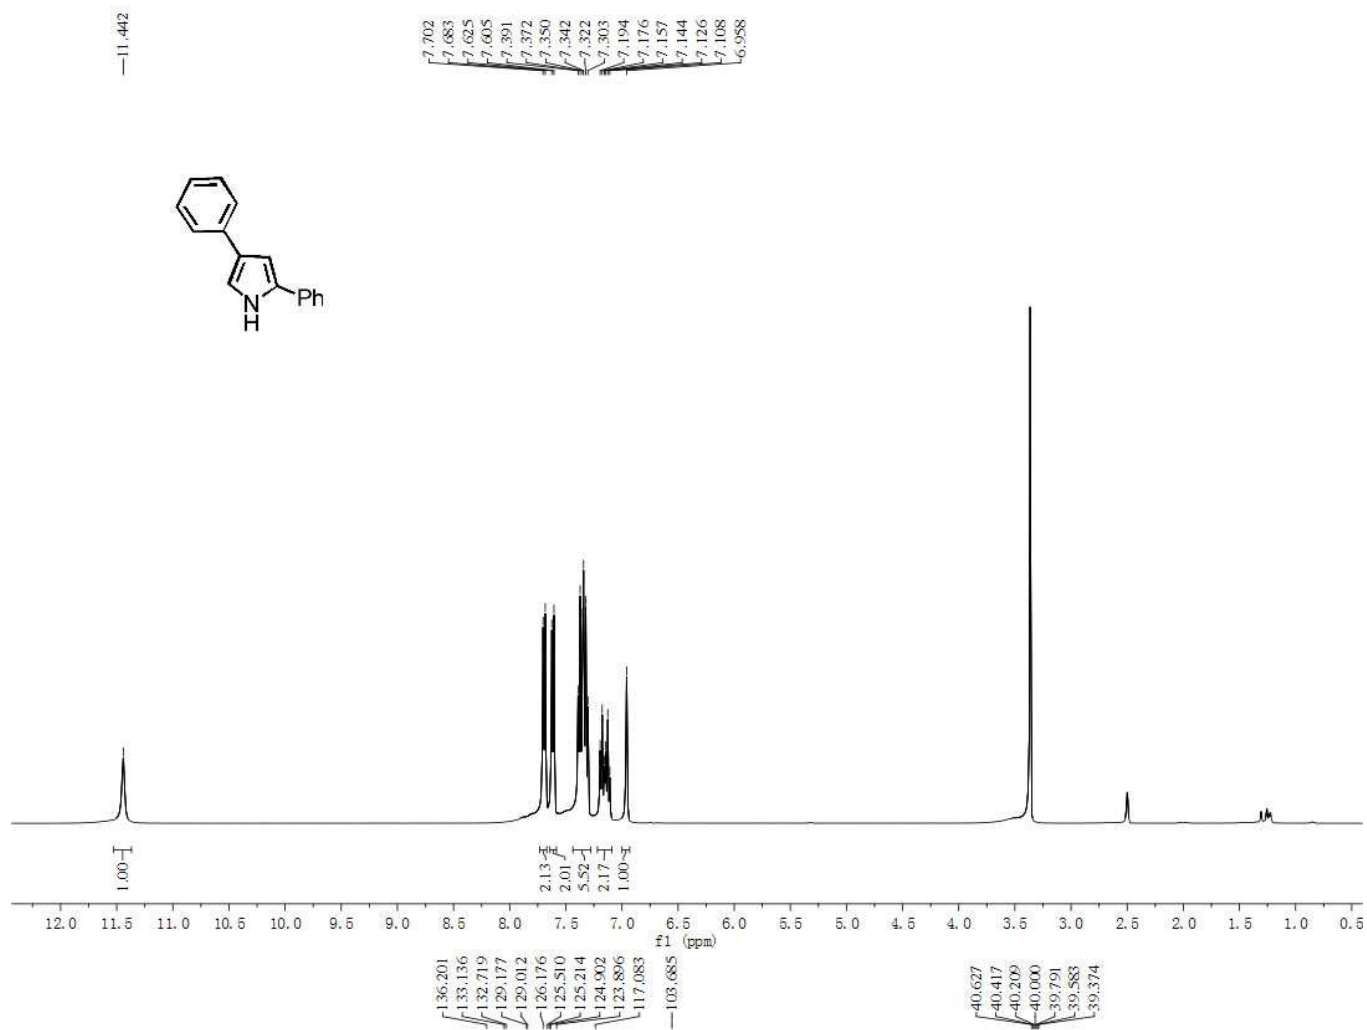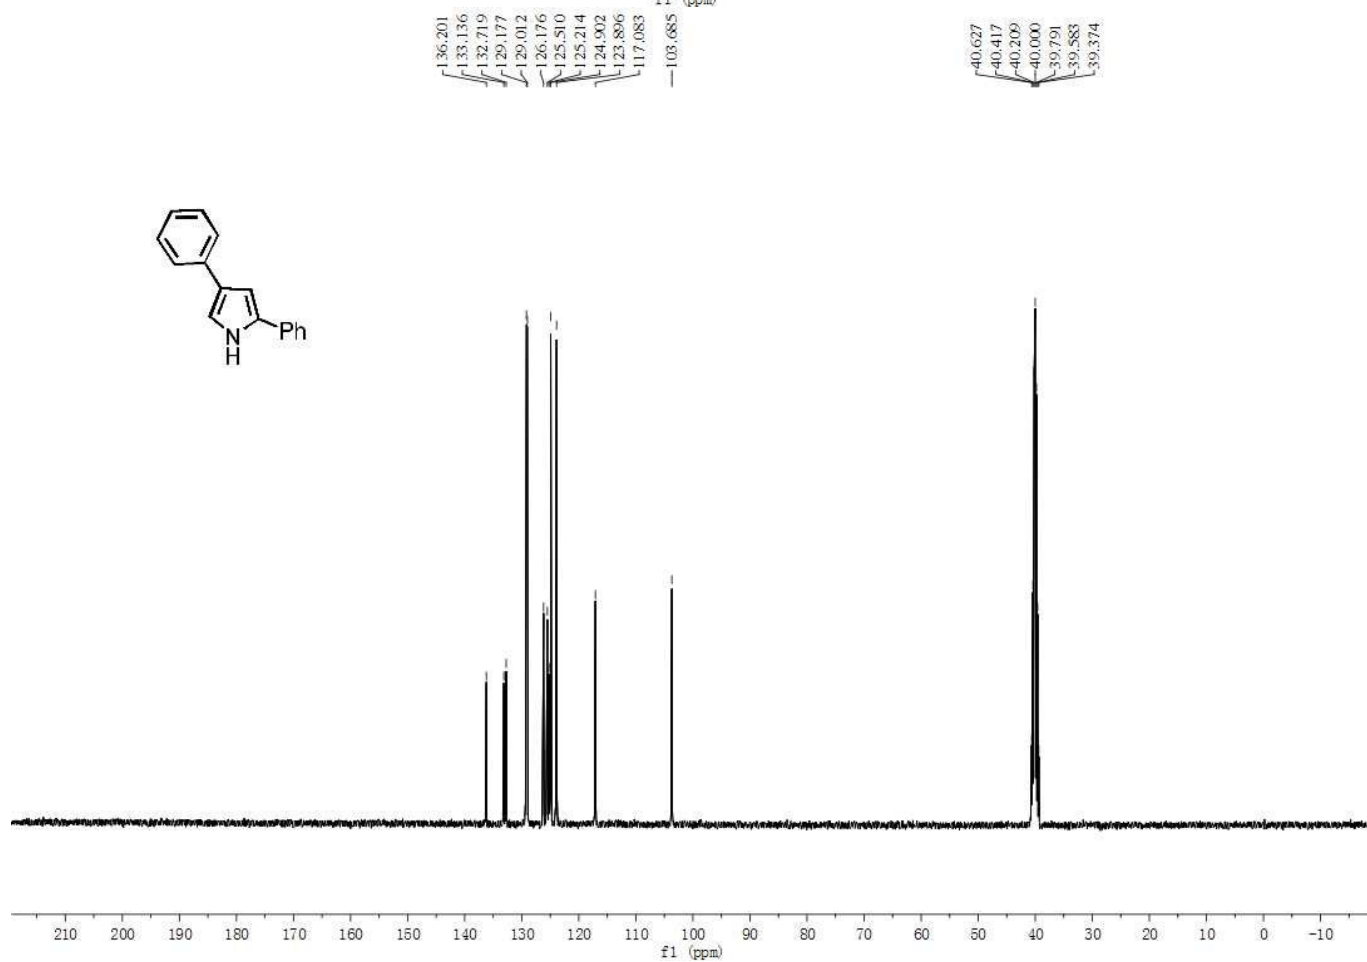

# <sup>1</sup>H and <sup>13</sup>C NMR Spectra of 2b

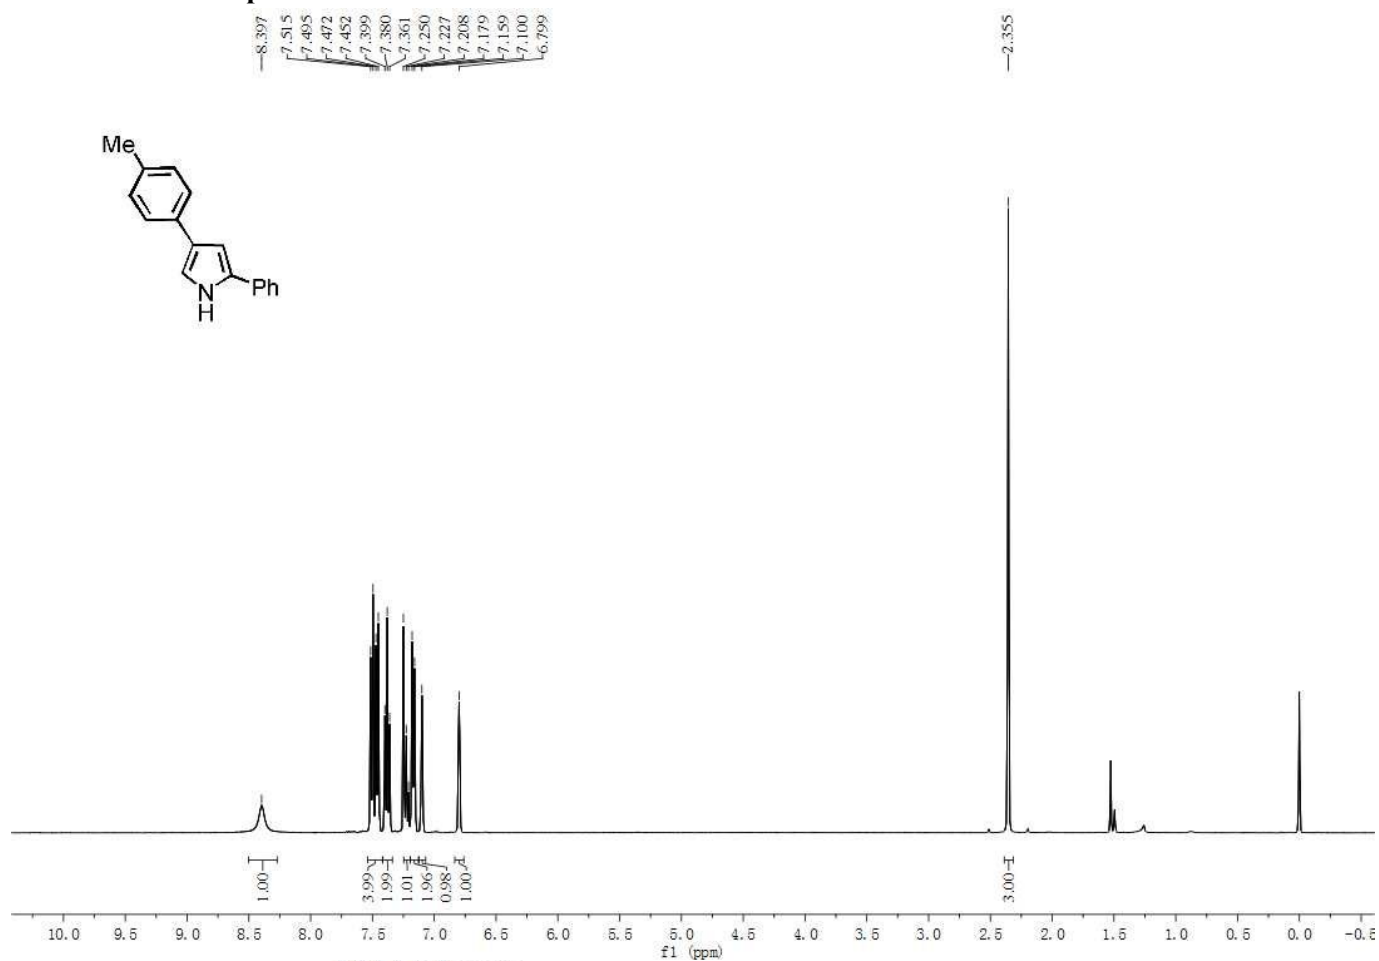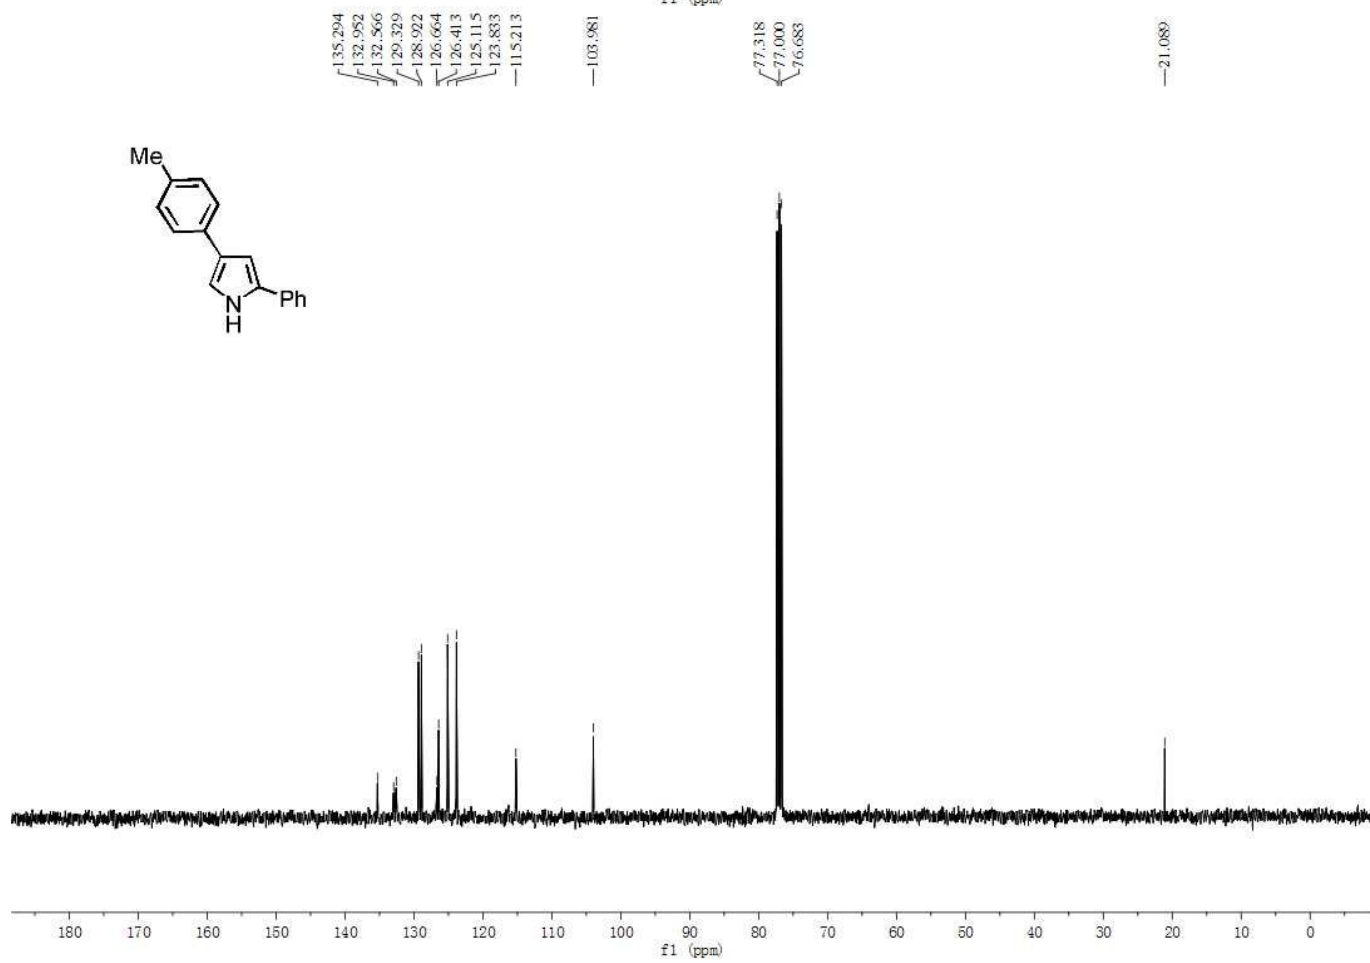

# <sup>1</sup>H and <sup>13</sup>C NMR Spectra of 2c

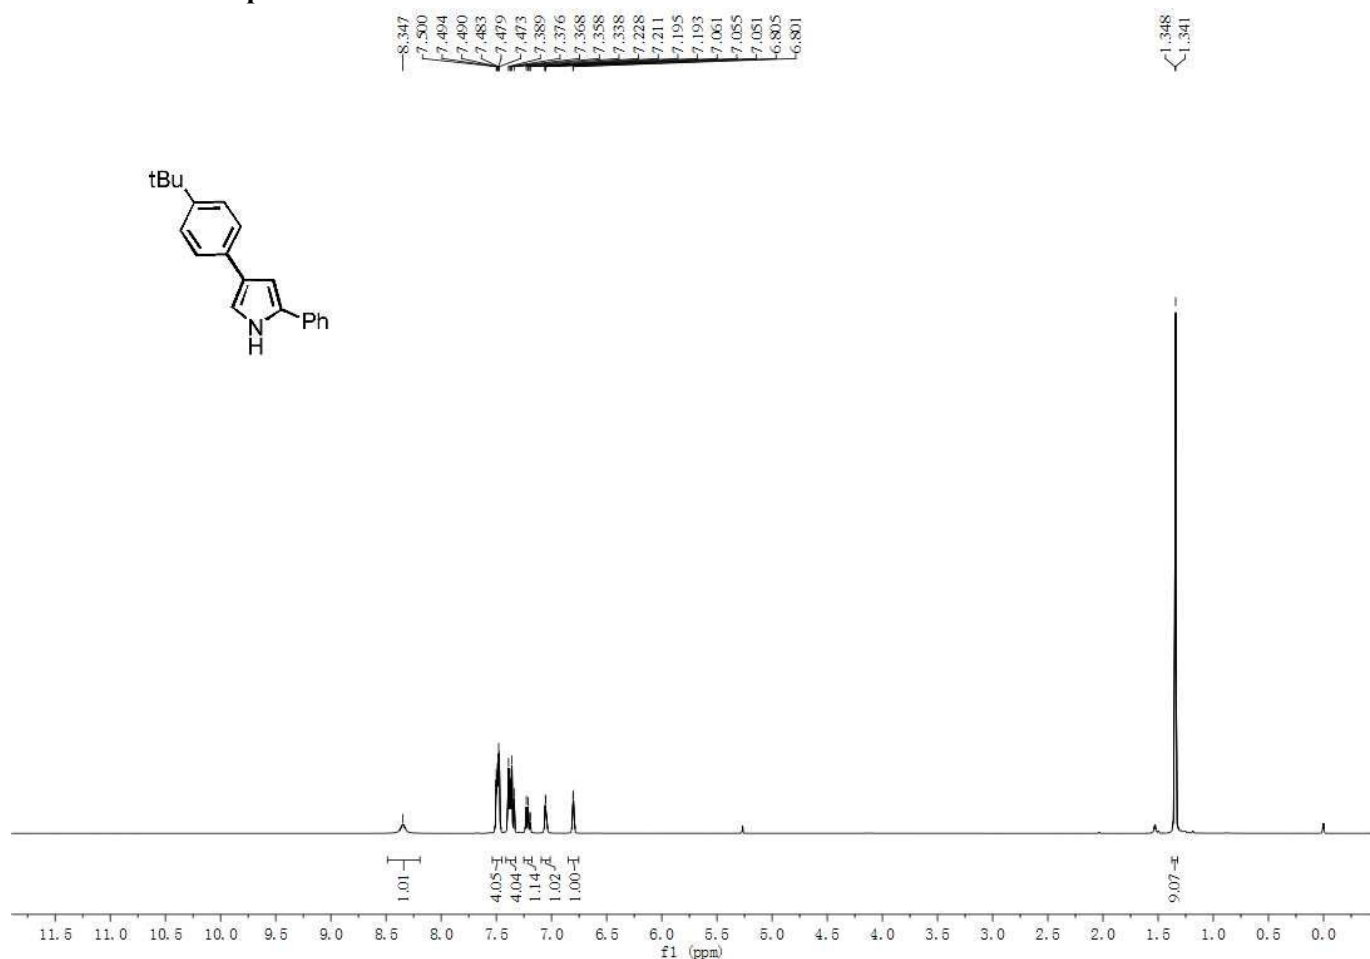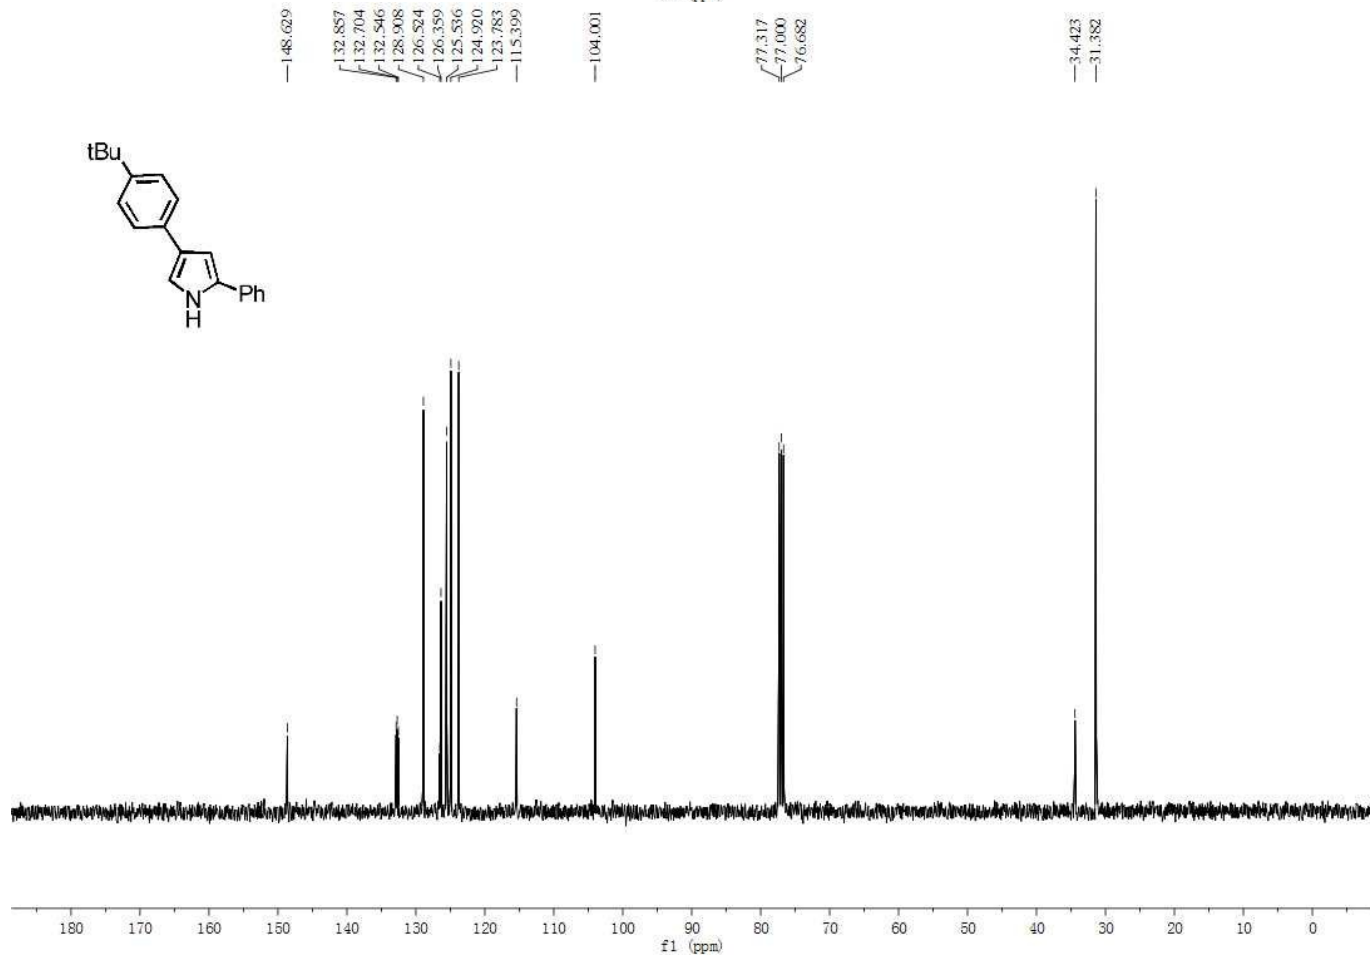

<sup>1</sup>H, <sup>13</sup>C and <sup>19</sup>F NMR Spectra of 2d

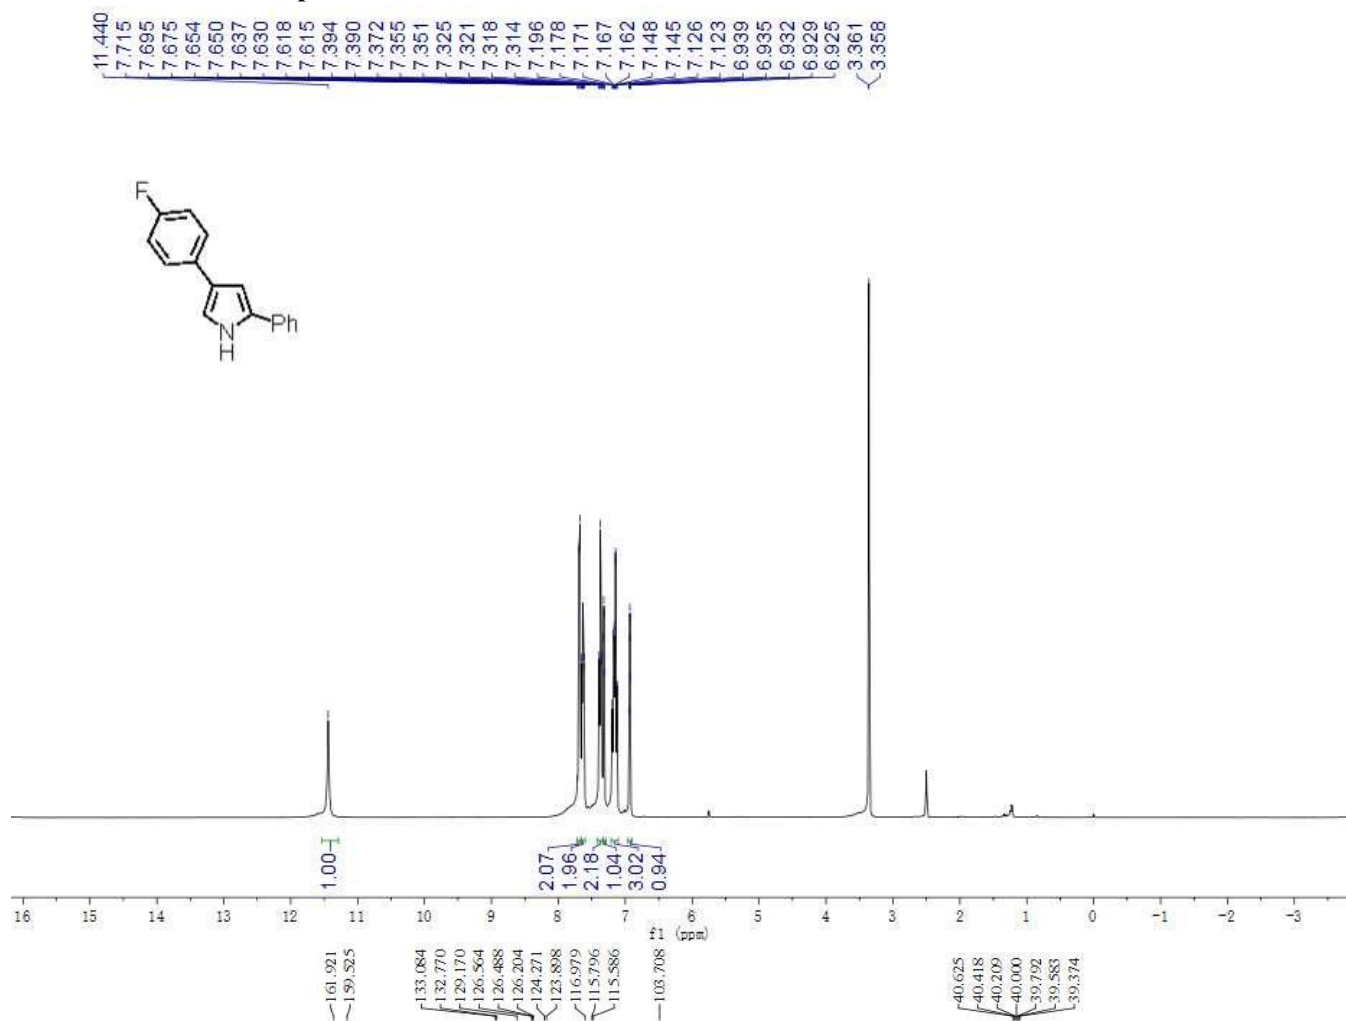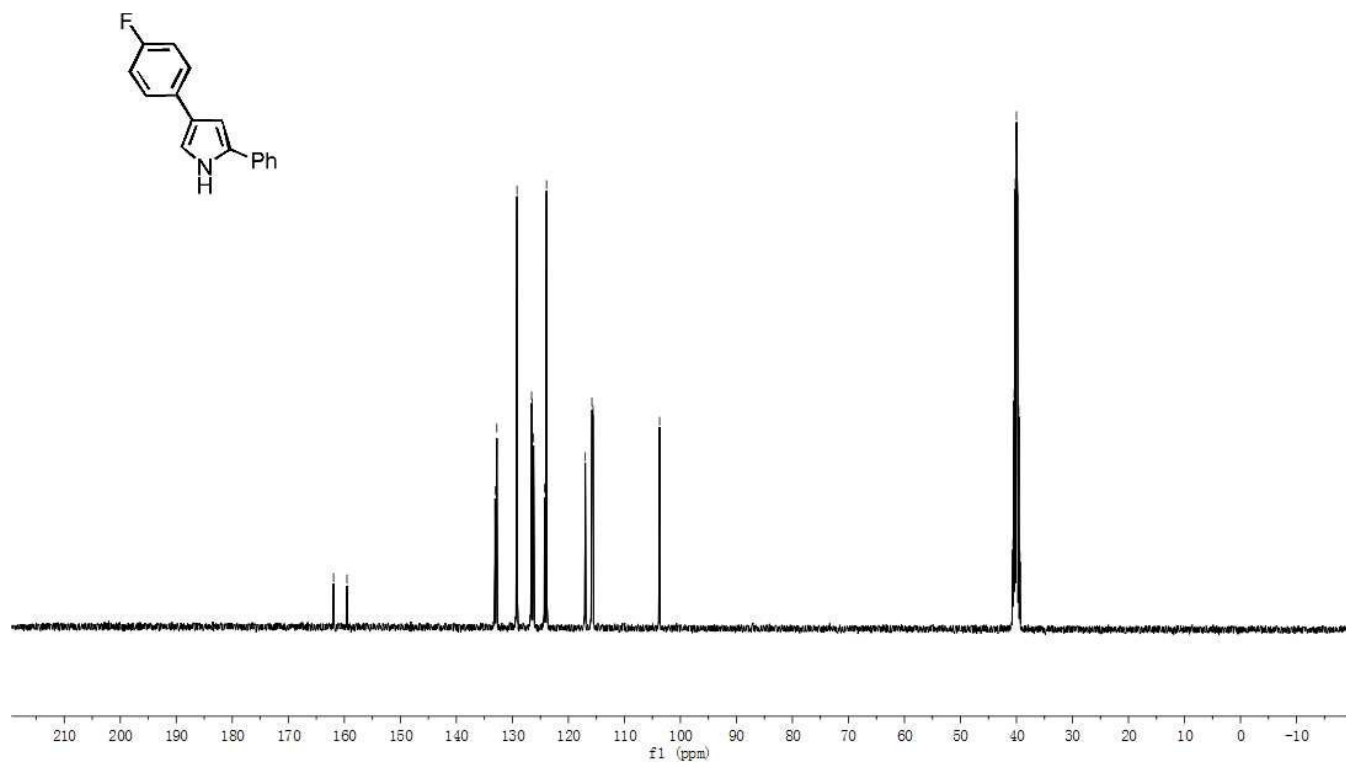

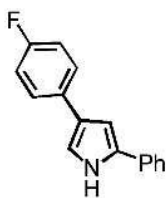

118.201  
118.225  
118.239  
118.251  
118.259  
118.276

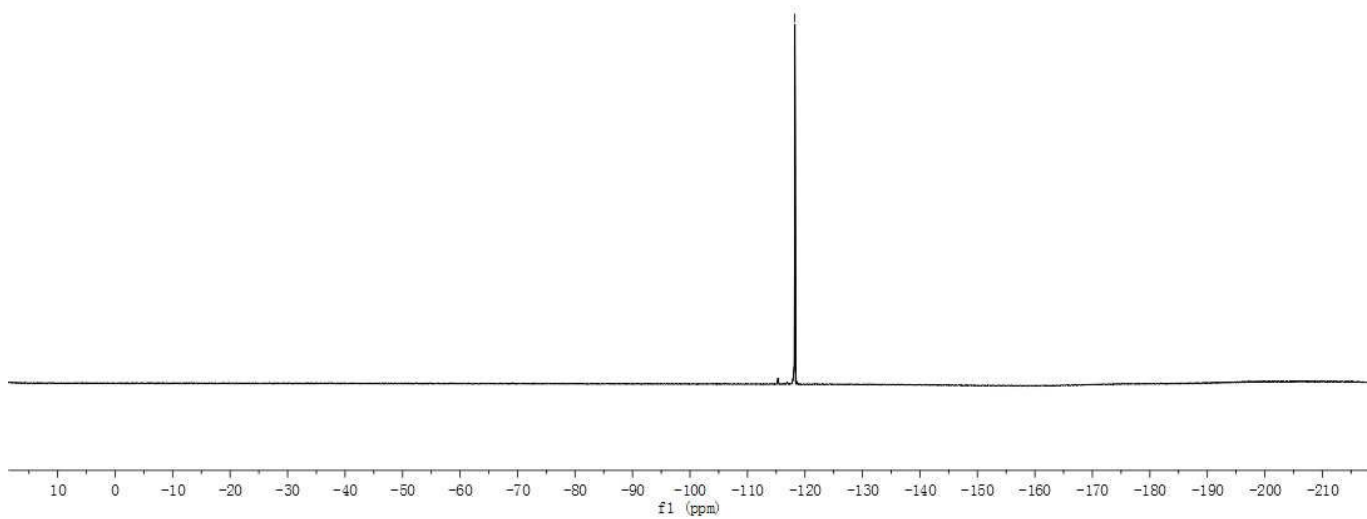

# <sup>1</sup>H and <sup>13</sup>C NMR Spectra of 2e

8.444  
7.503  
7.486  
7.466  
7.403  
7.384  
7.365  
7.320  
7.299  
7.259  
7.245  
7.223  
7.097  
6.769

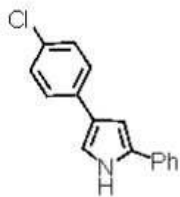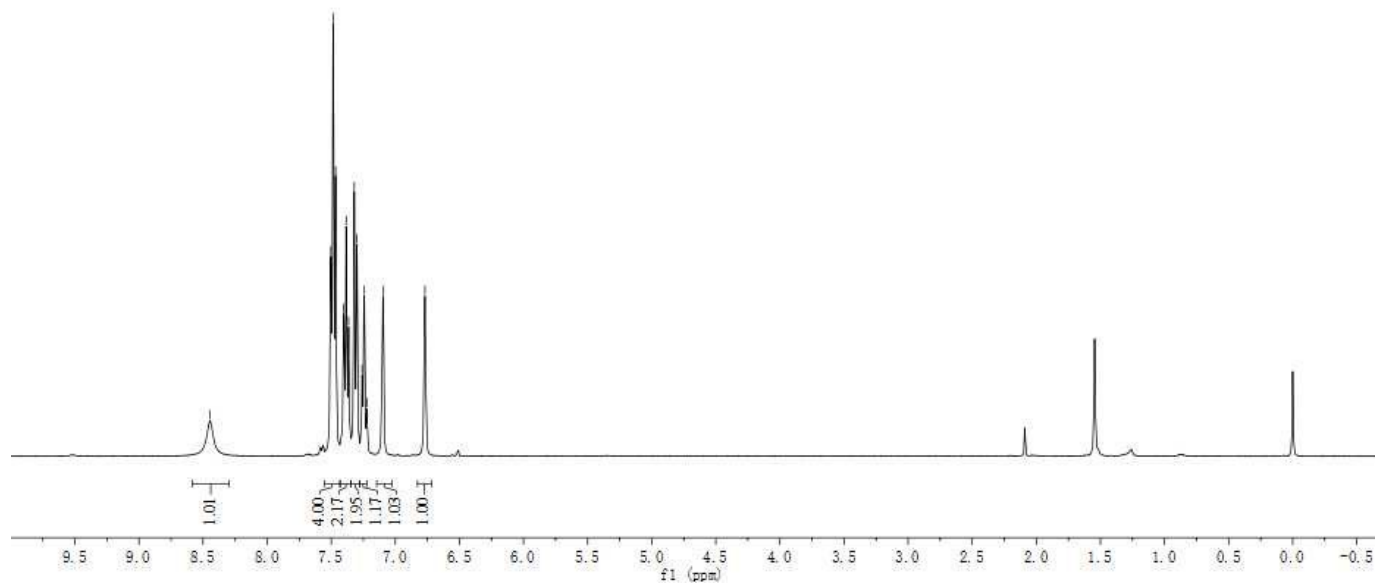

134.049  
133.343  
132.292  
131.217  
128.981  
128.739  
126.663  
126.341  
125.515  
123.895  
115.606  
103.835  
77.318  
77.000  
76.682

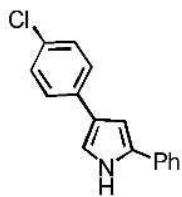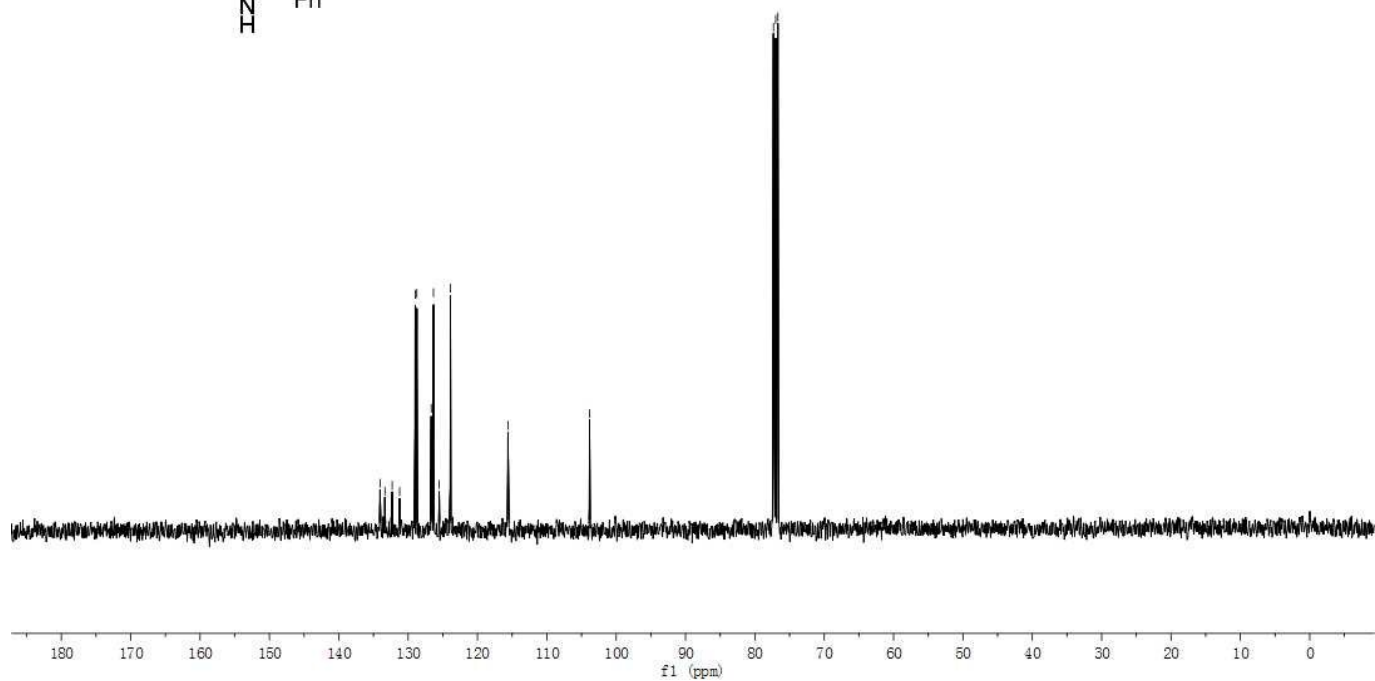

# <sup>1</sup>H and <sup>13</sup>C NMR Spectra of 2f

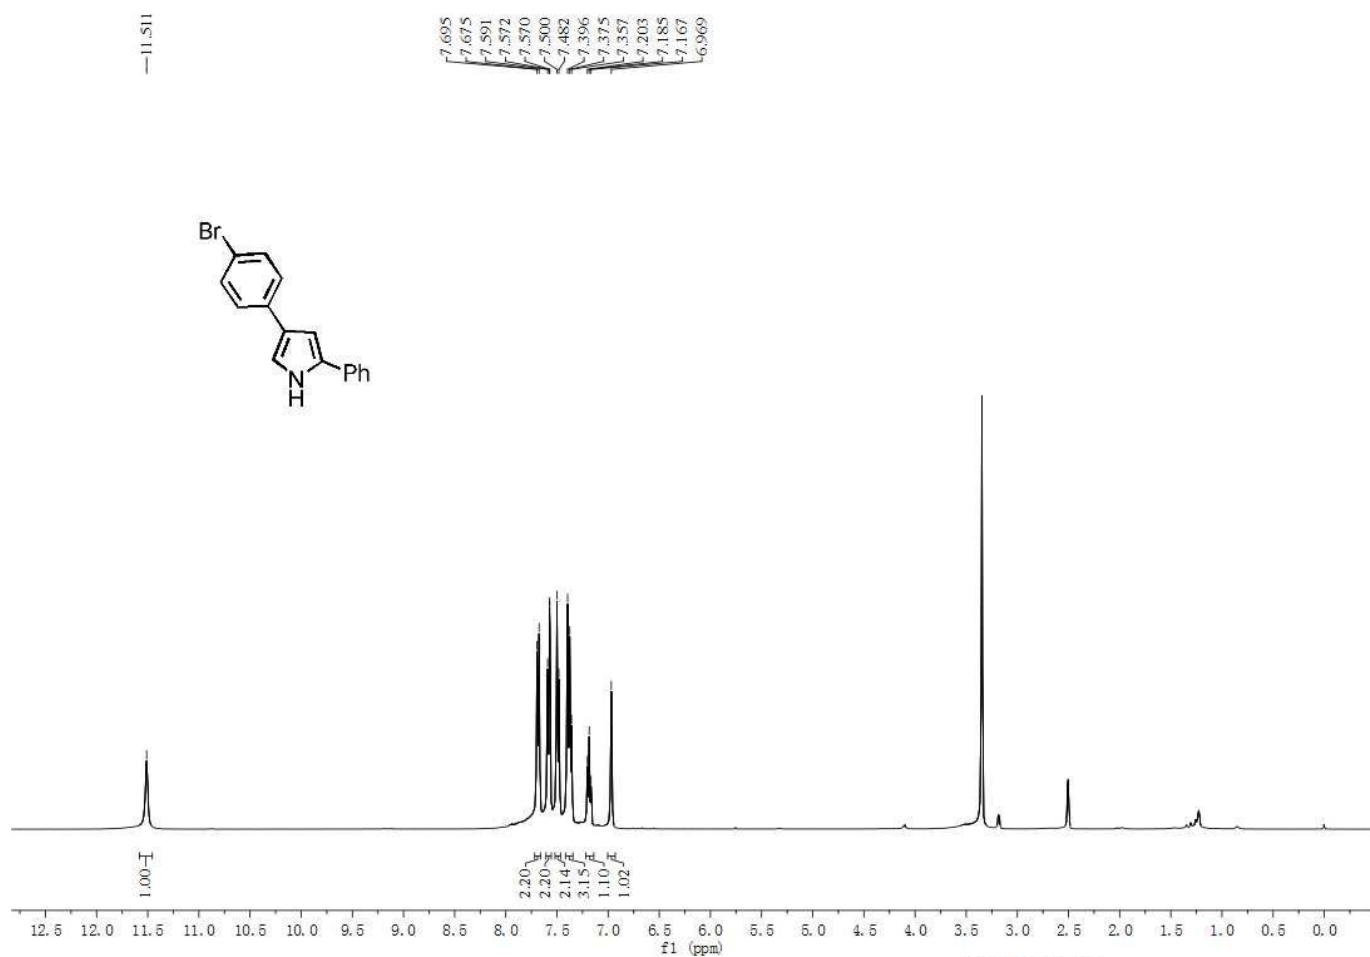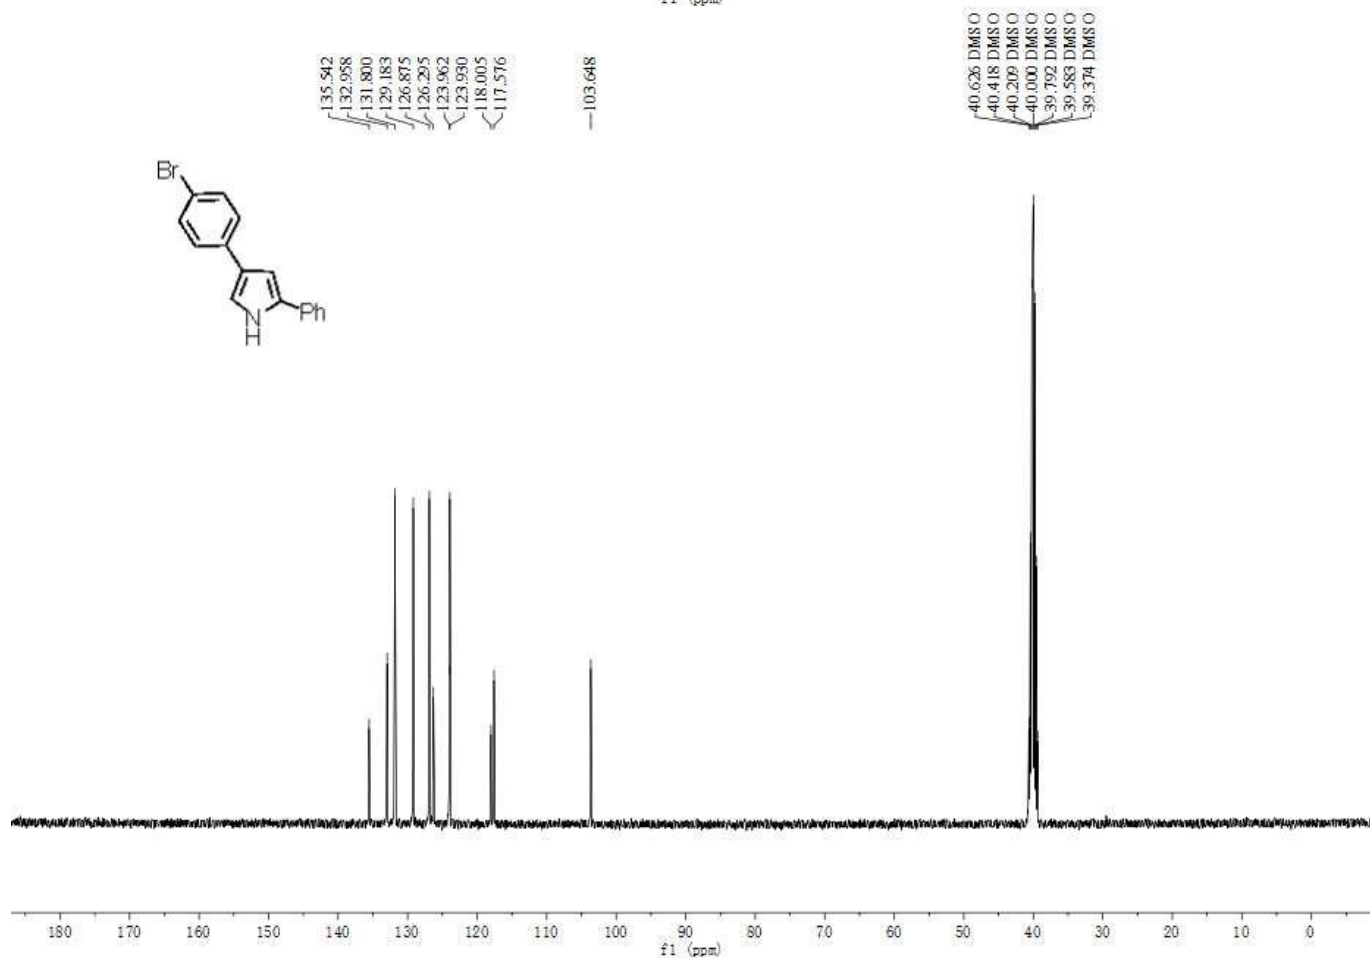



# <sup>1</sup>H, <sup>13</sup>C and <sup>19</sup>F NMR Spectra of 2g

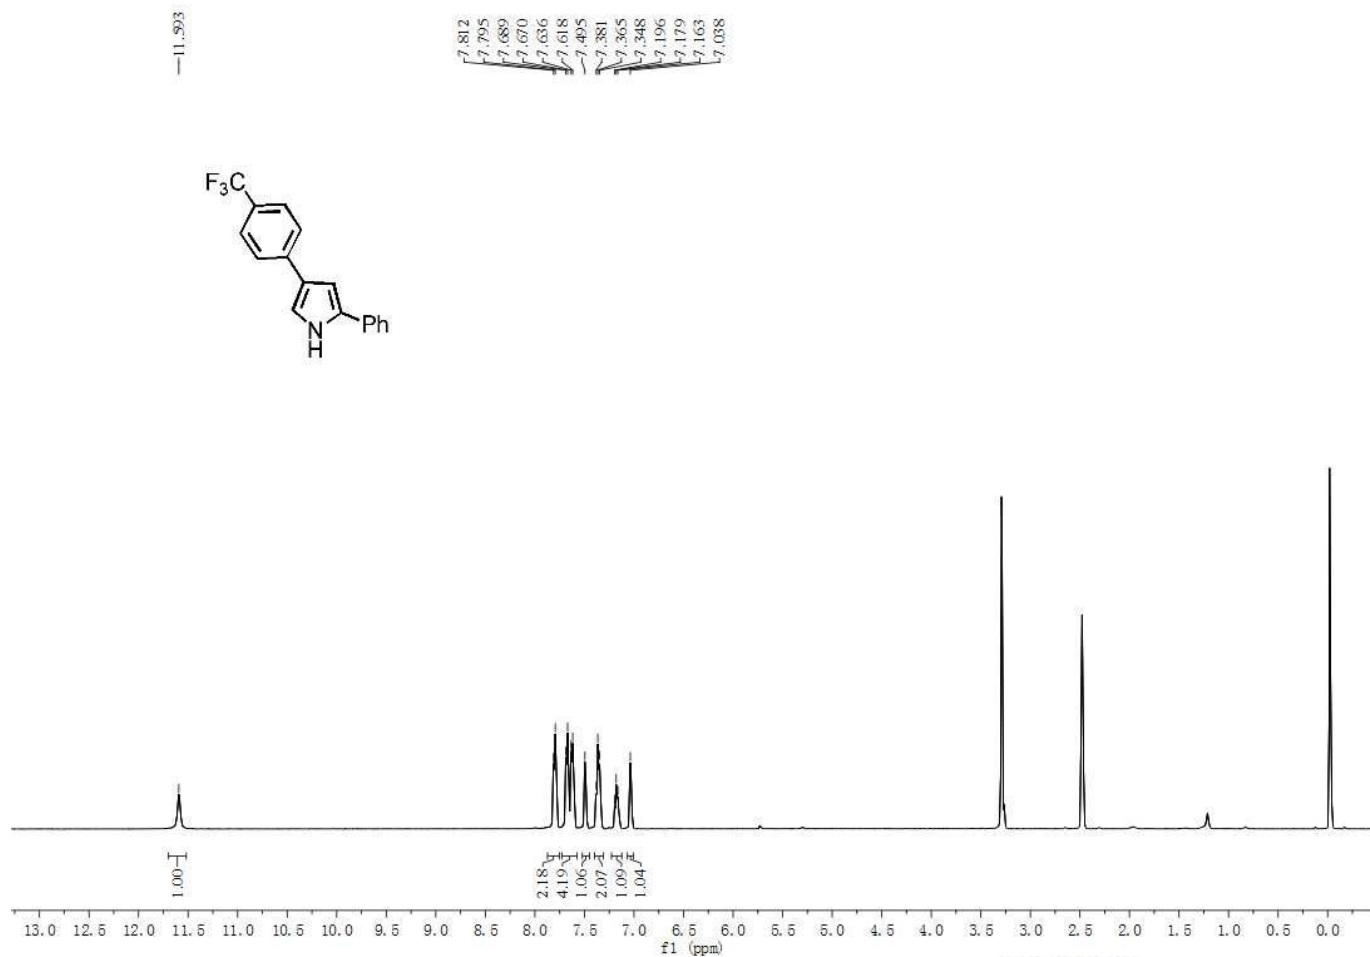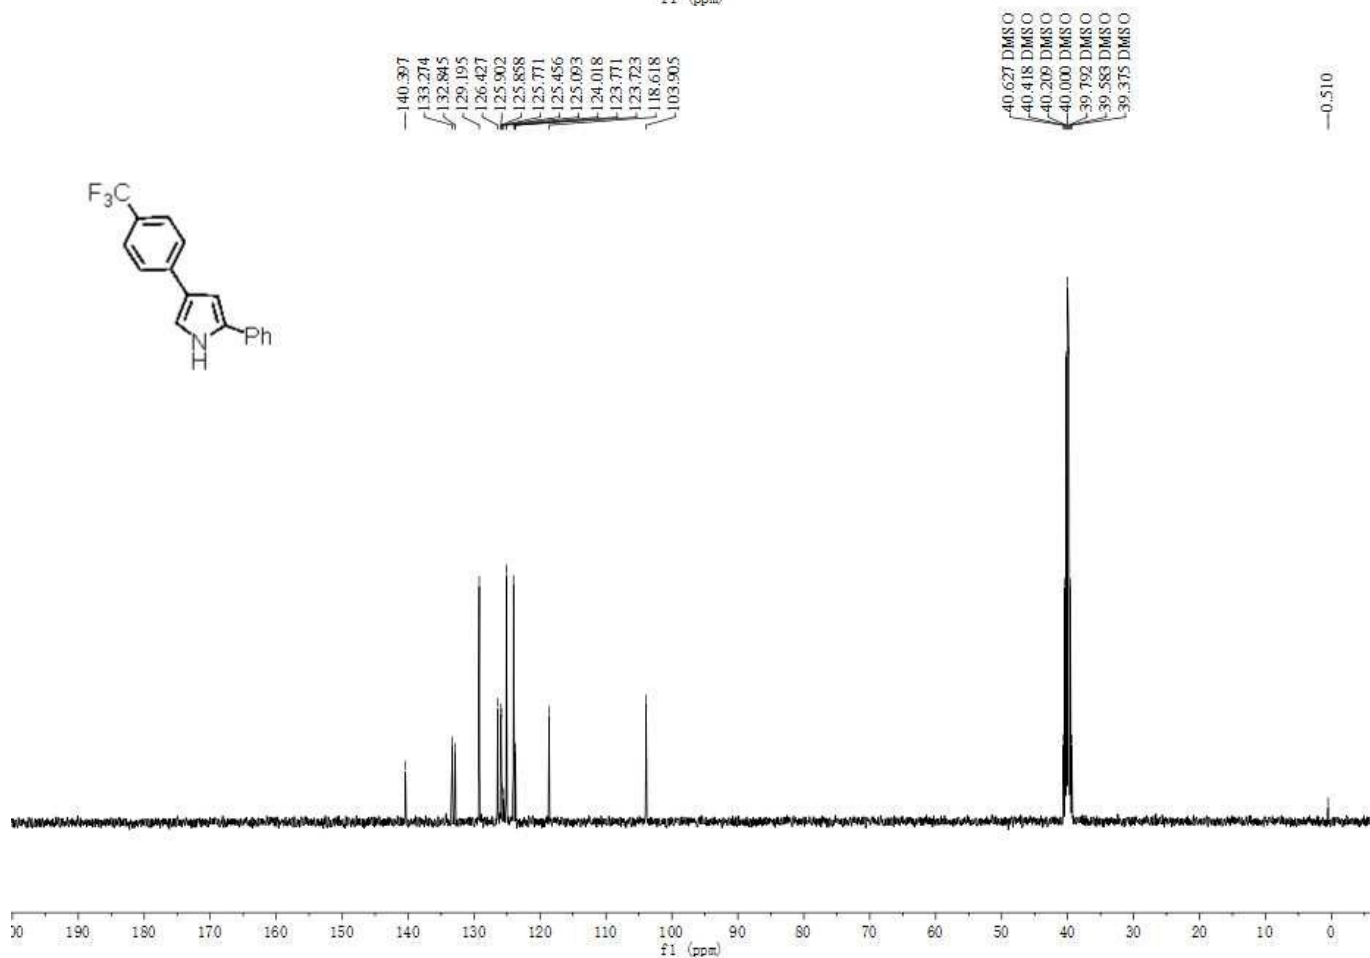

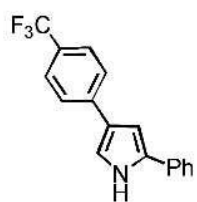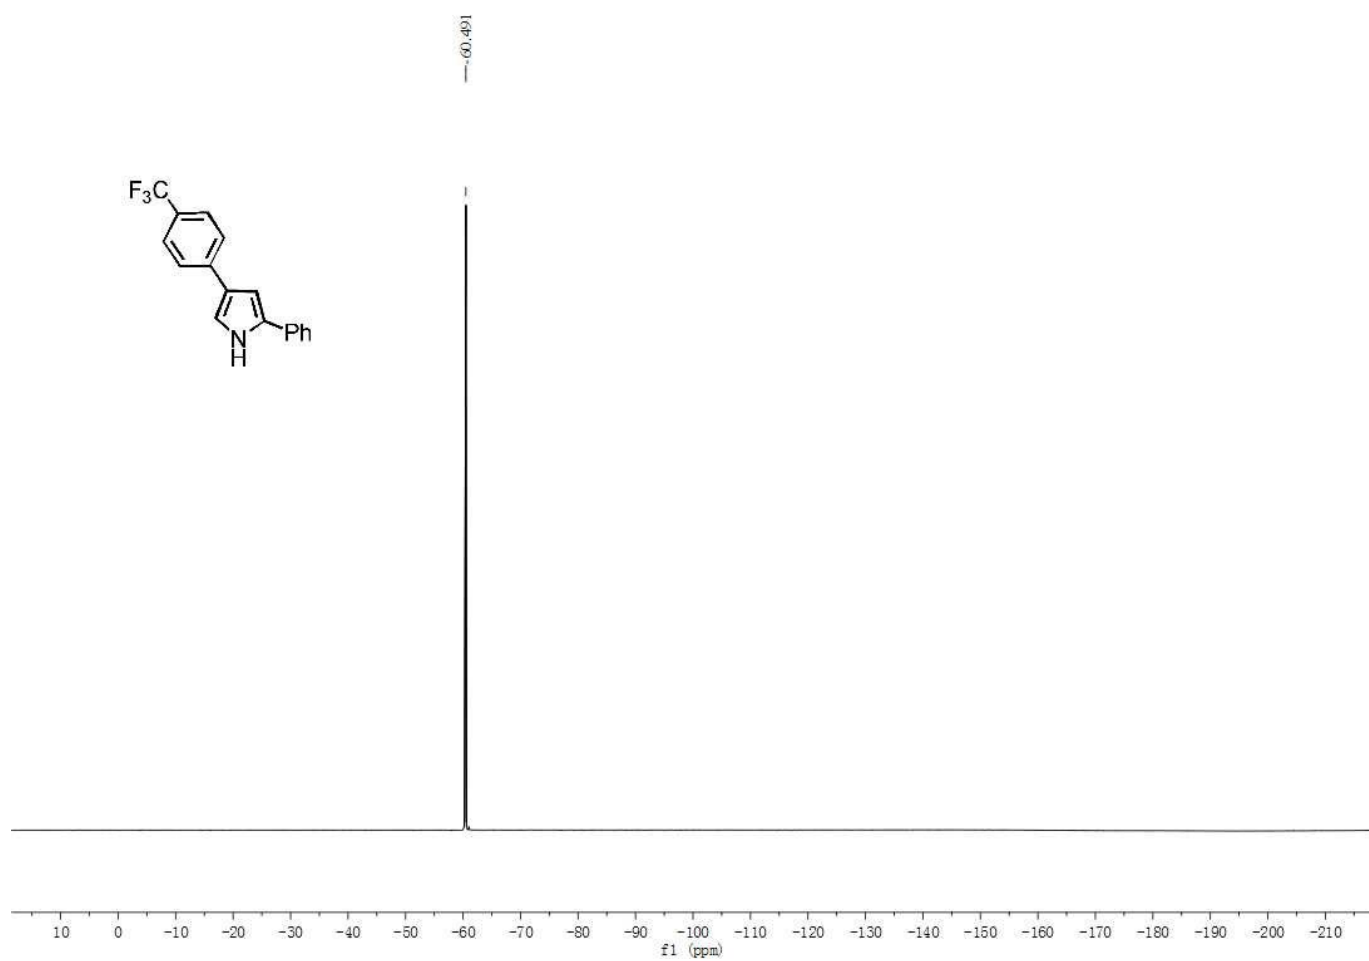

# <sup>1</sup>H and <sup>13</sup>C NMR Spectra of 2h

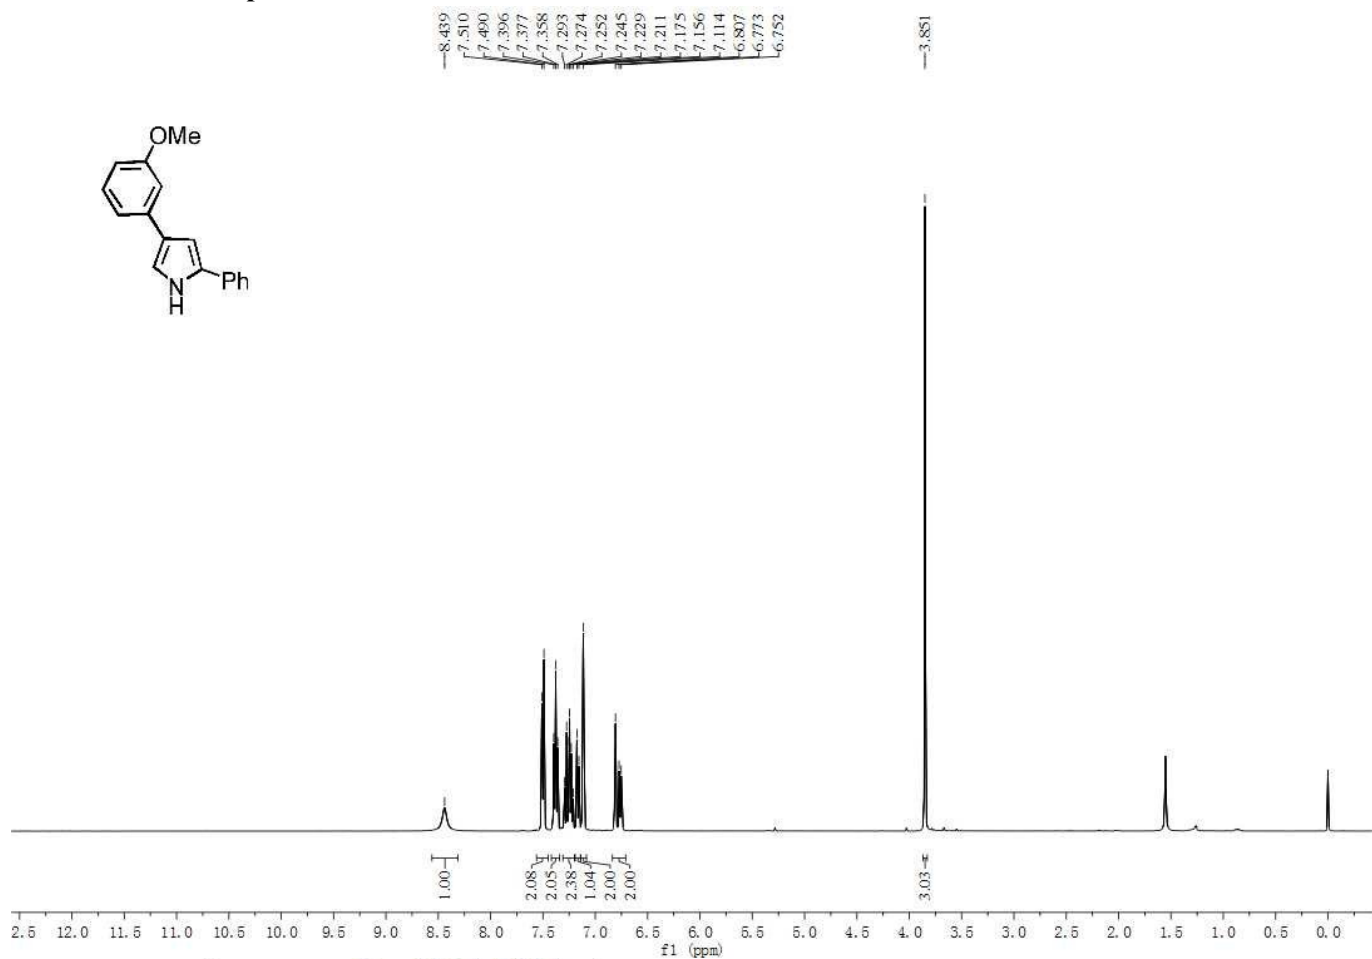

8.439  
7.510  
7.490  
7.396  
7.377  
7.358  
7.293  
7.274  
7.252  
7.245  
7.229  
7.211  
7.175  
7.156  
7.114  
6.807  
6.773  
6.752

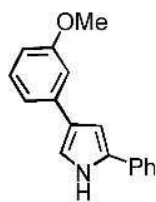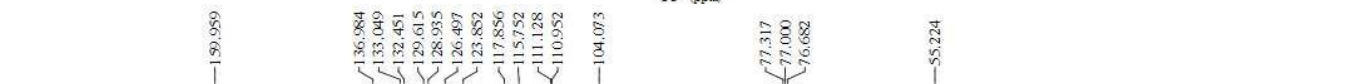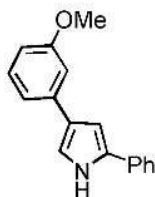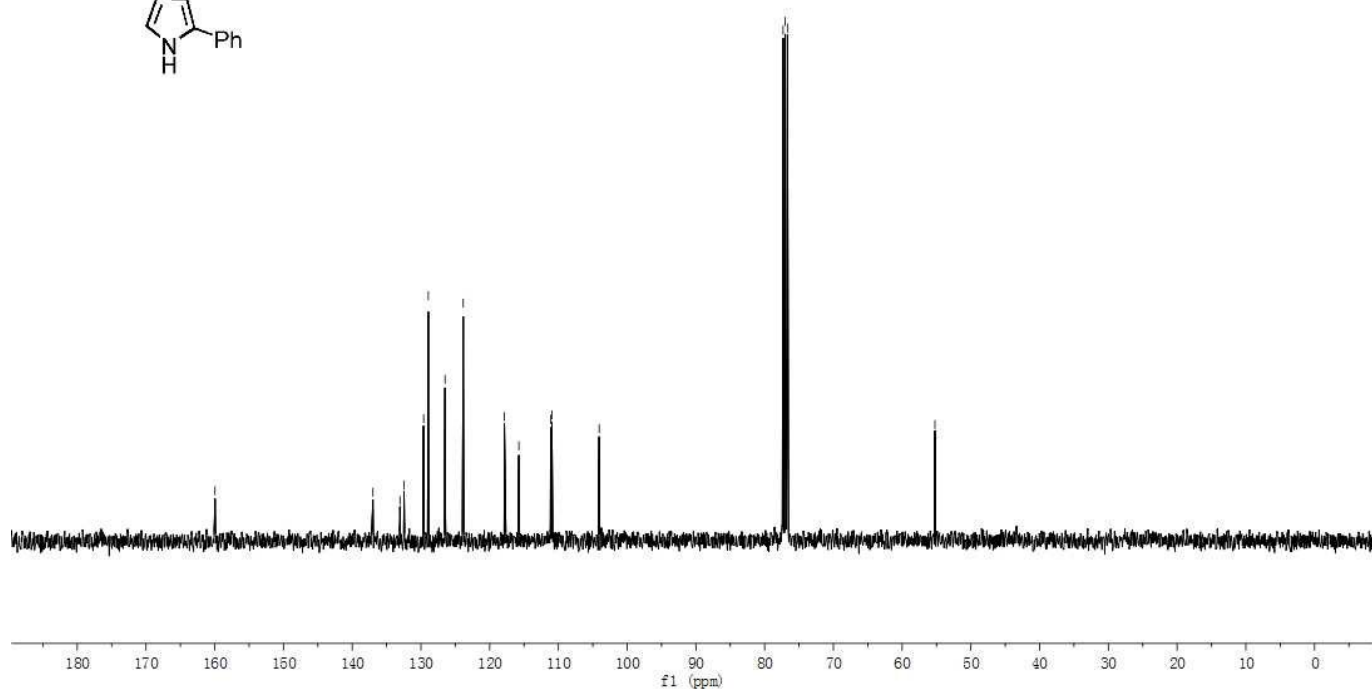

<sup>1</sup>H and <sup>13</sup>C NMR Spectra of 2i

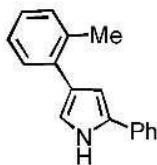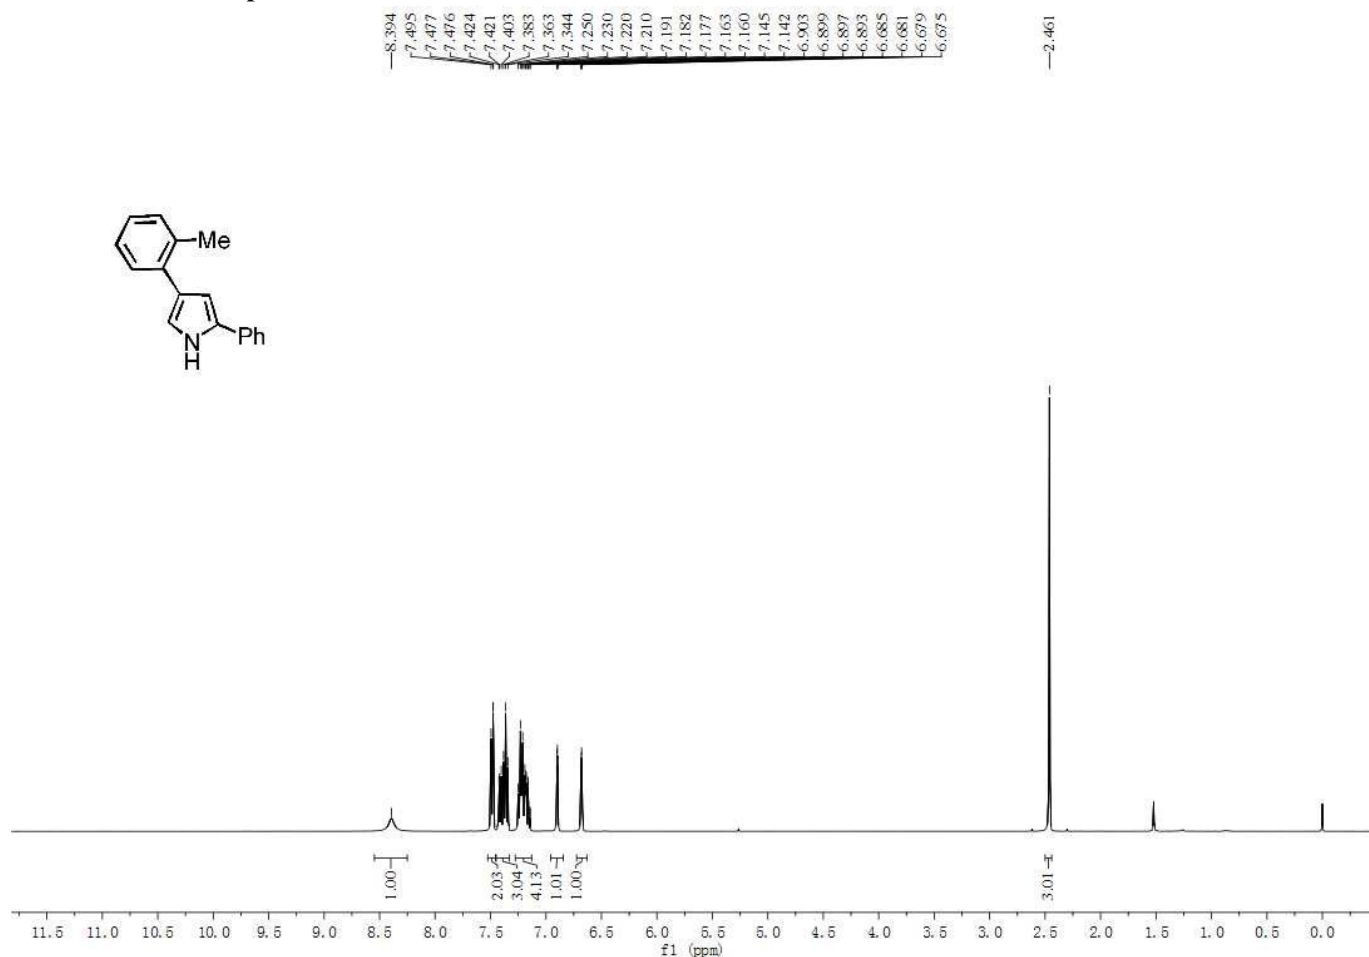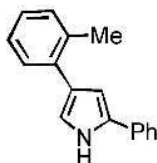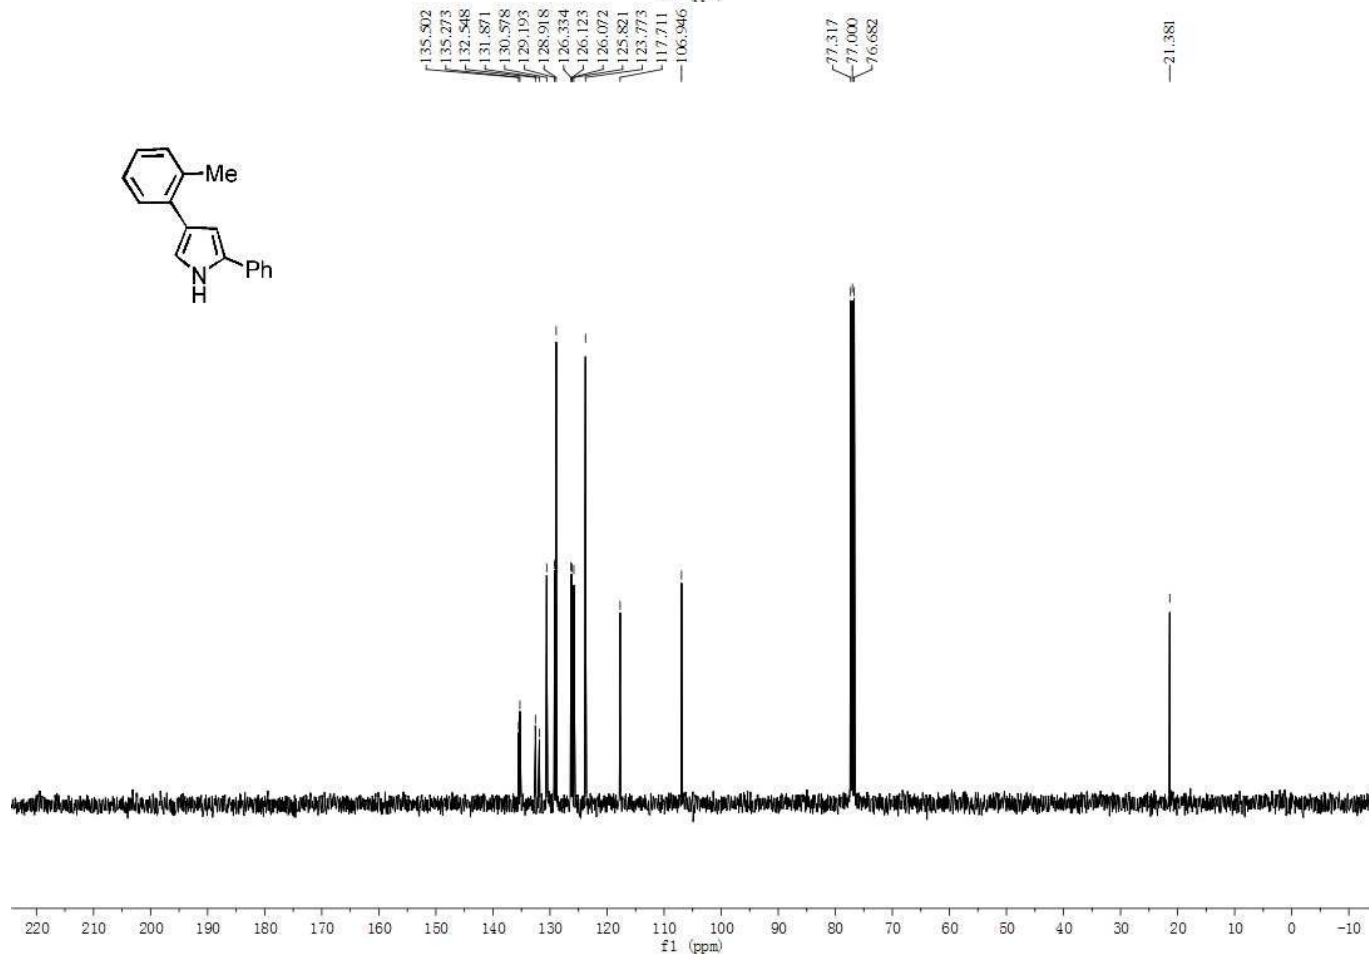

# <sup>1</sup>H and <sup>13</sup>C NMR Spectra of 2j

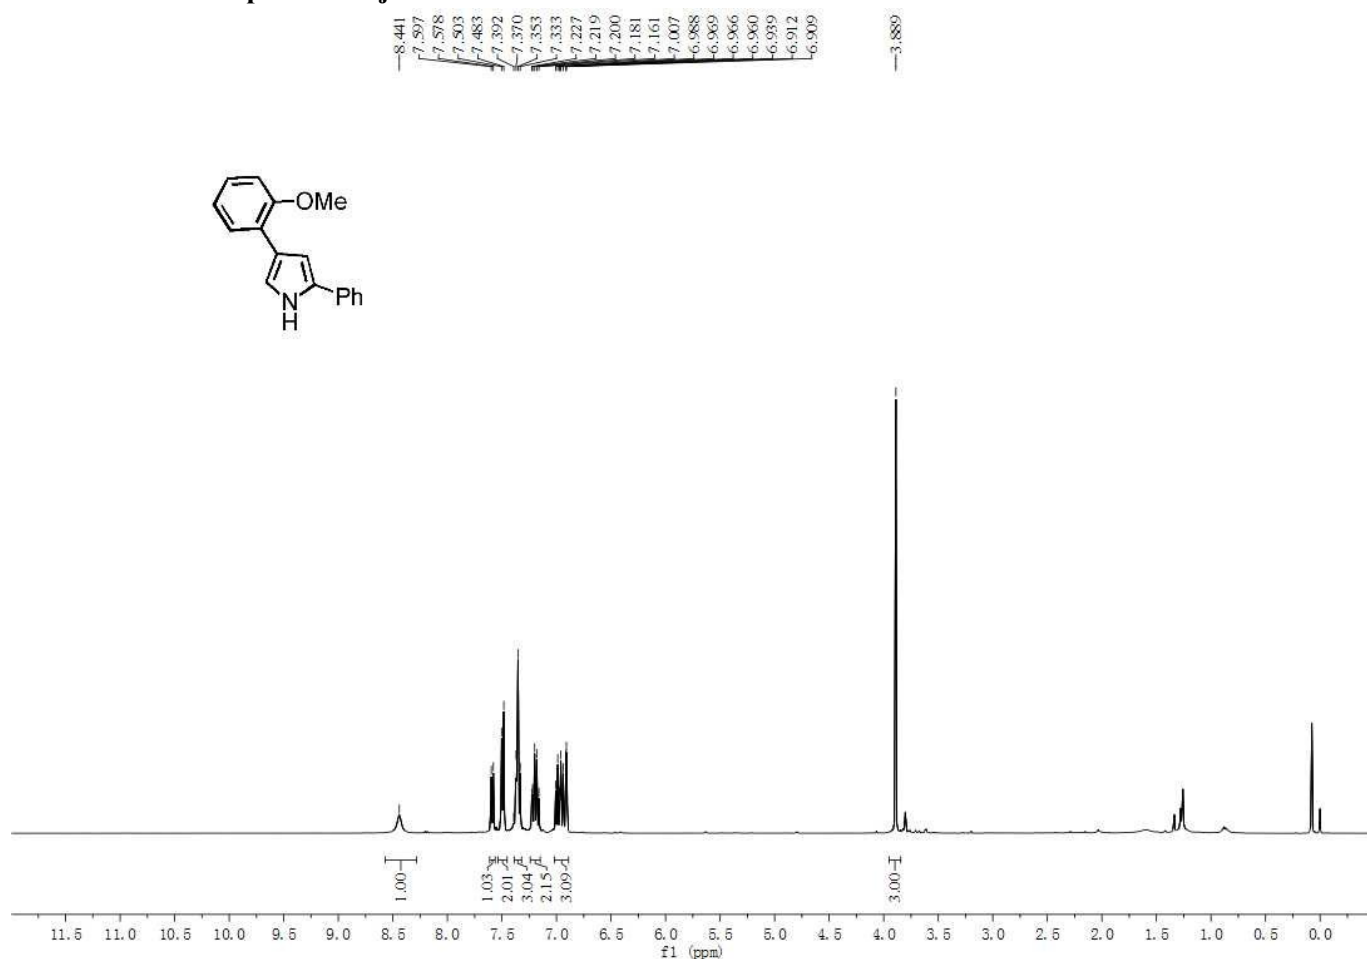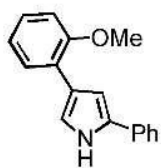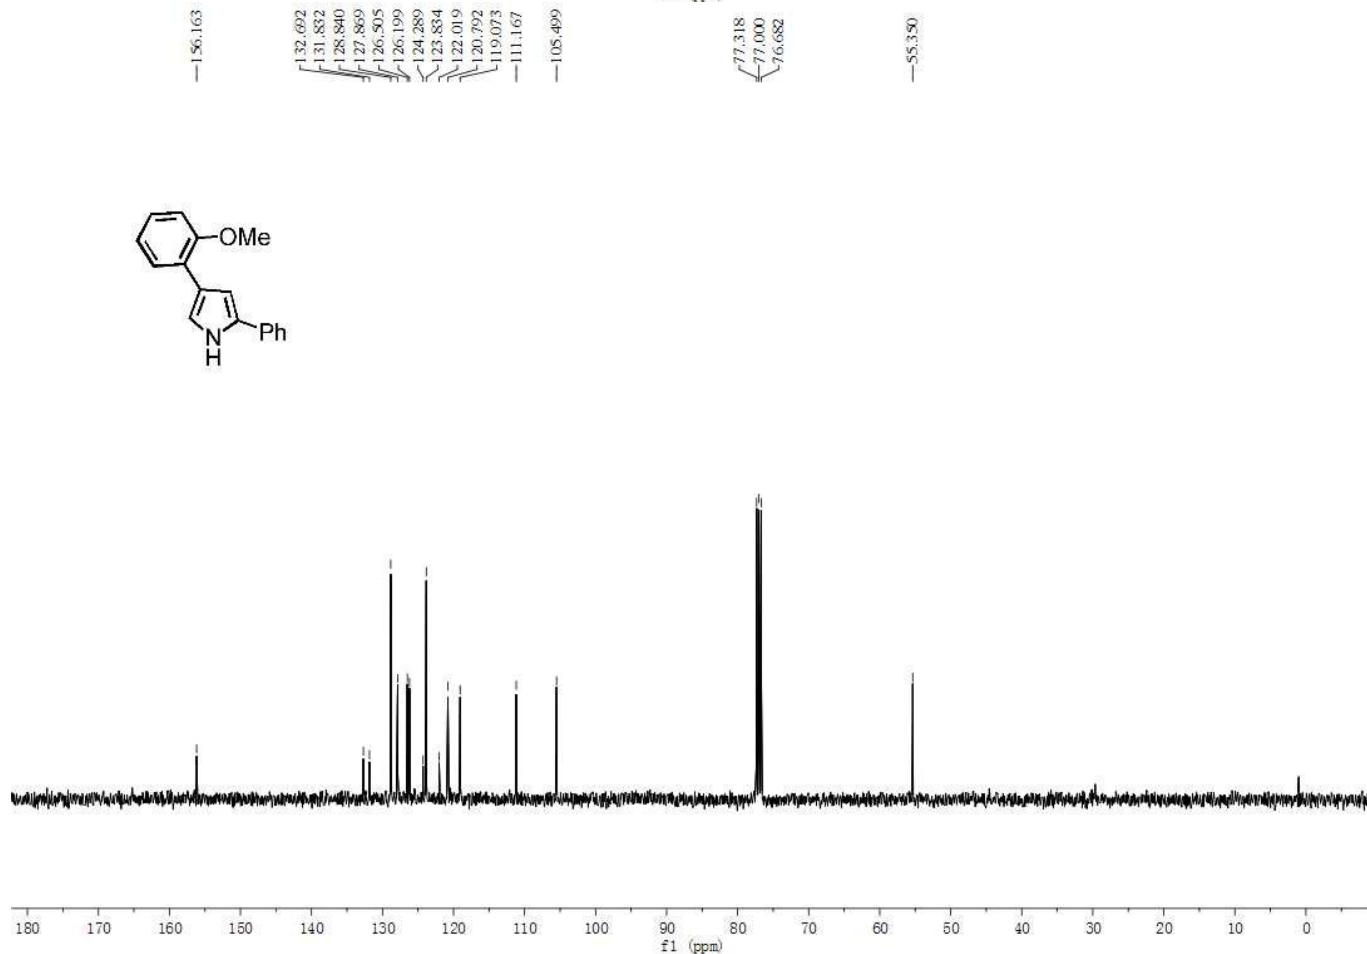

# <sup>1</sup>H, <sup>13</sup>C and <sup>19</sup>F NMR Spectra of 2k

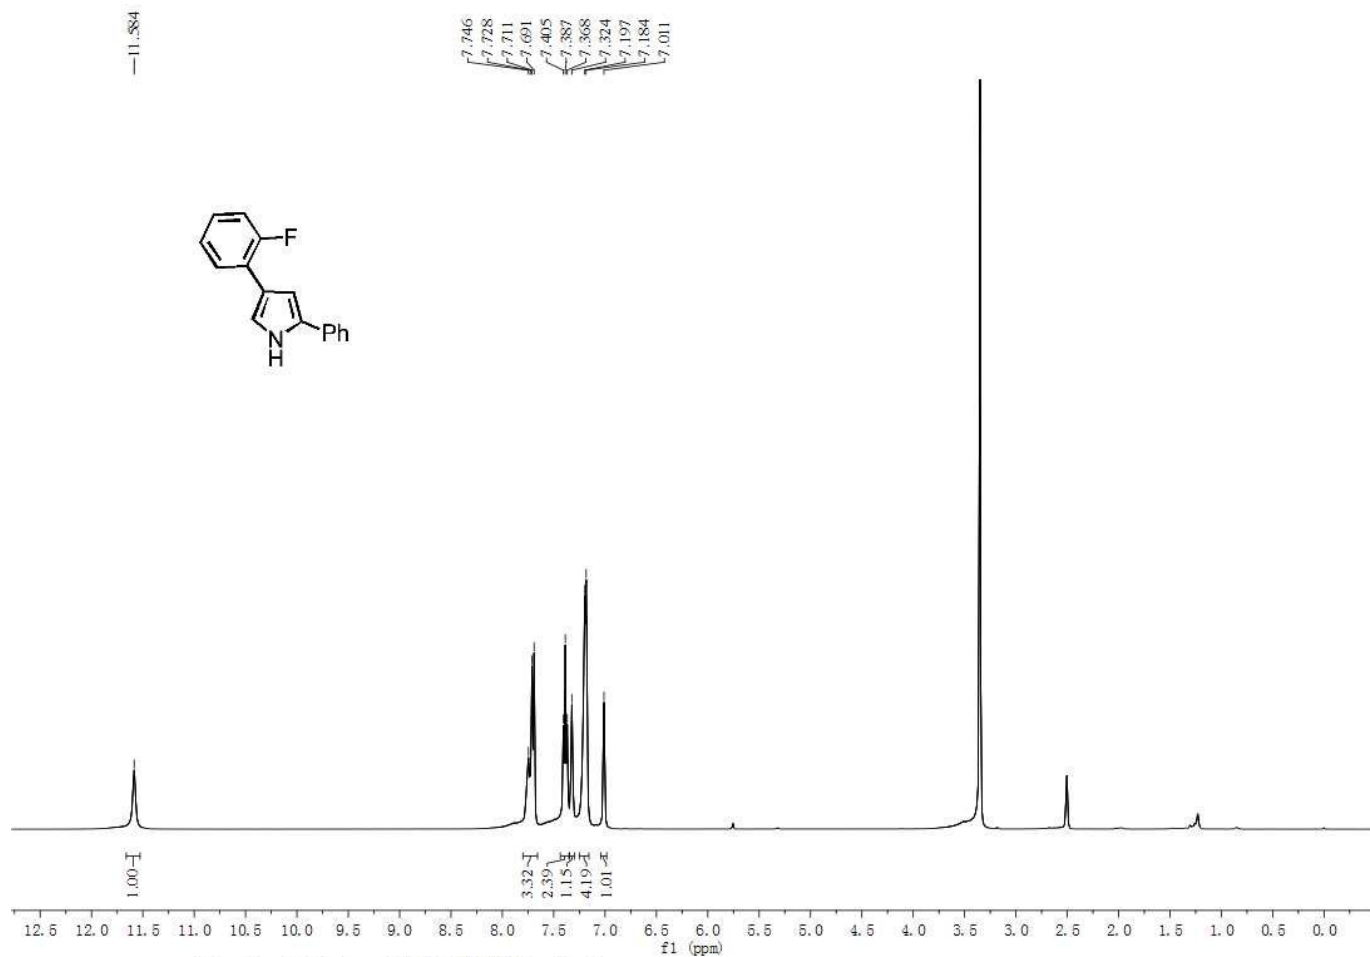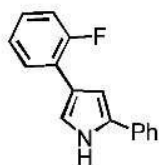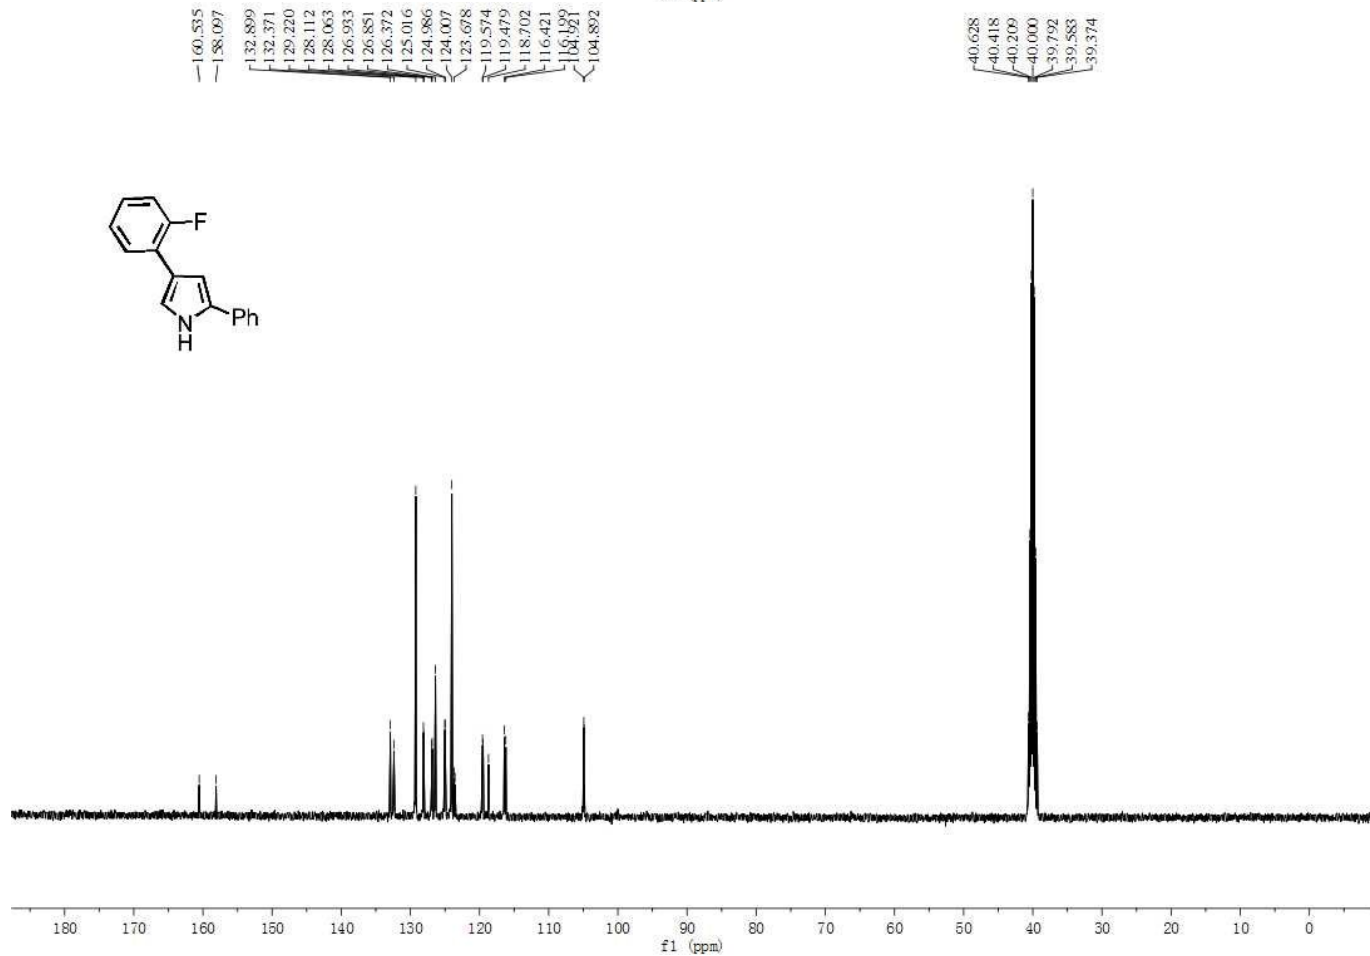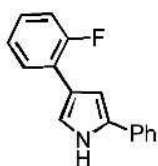

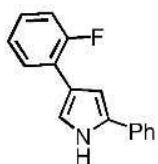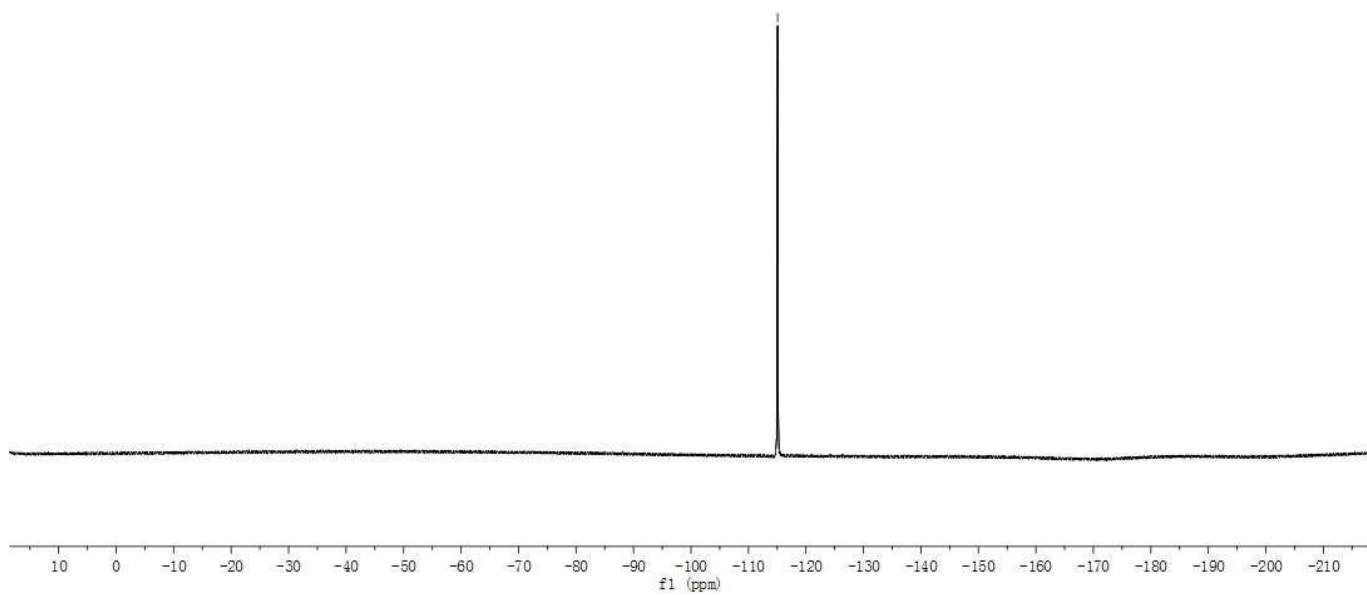

# <sup>1</sup>H and <sup>13</sup>C NMR Spectra of 2l

8.518  
7.540  
7.502  
7.445  
7.425  
7.400  
7.382  
7.363  
7.279  
7.260  
7.245  
7.232  
7.213  
7.167  
7.148  
7.130  
6.843

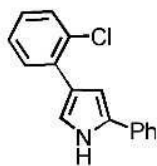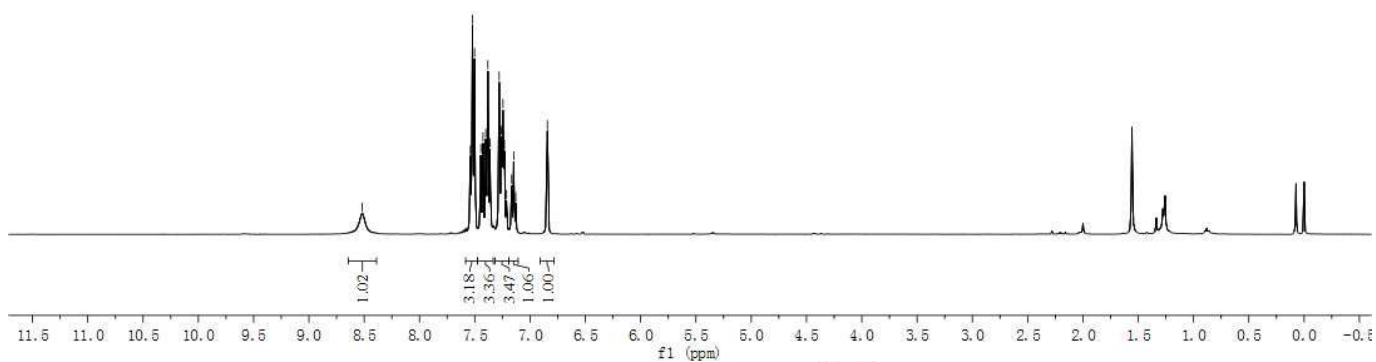

134.318  
132.383  
132.049  
131.795  
130.334  
130.146  
128.934  
126.895  
126.790  
126.505  
123.902  
123.393  
118.871  
106.711  
77.318 CDCl<sub>3</sub>  
77.000 CDCl<sub>3</sub>  
76.683 CDCl<sub>3</sub>

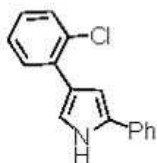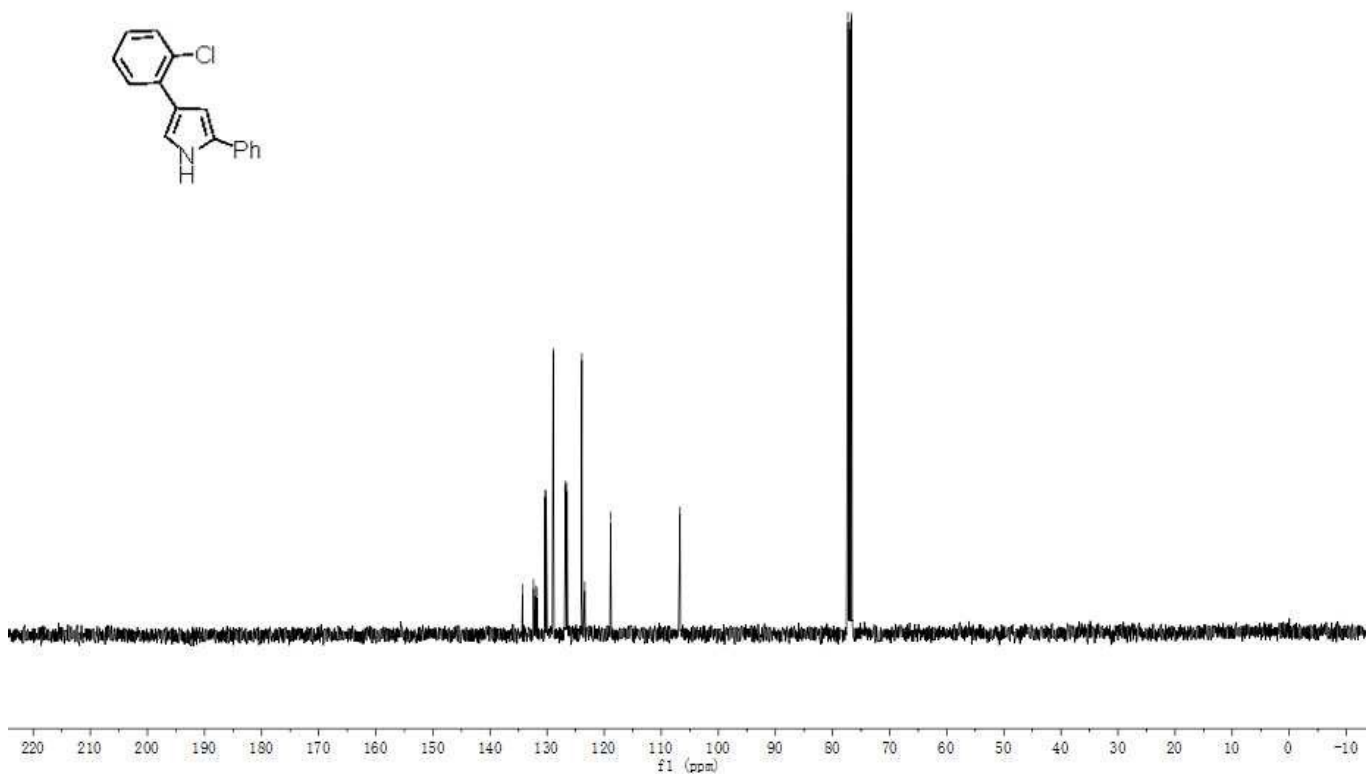



# <sup>1</sup>H and <sup>13</sup>C NMR Spectra of 2m

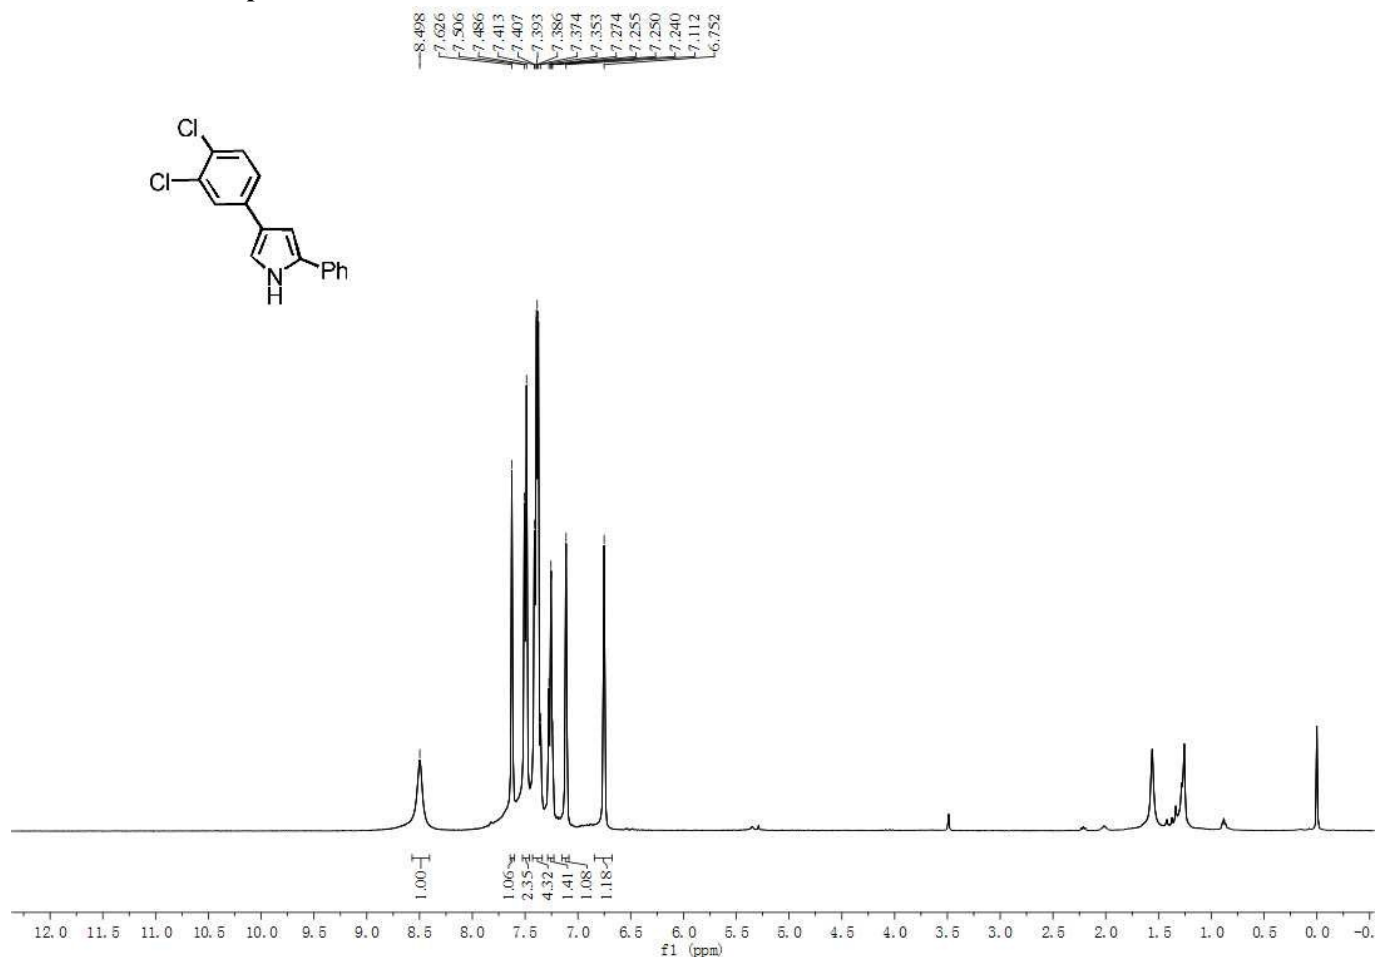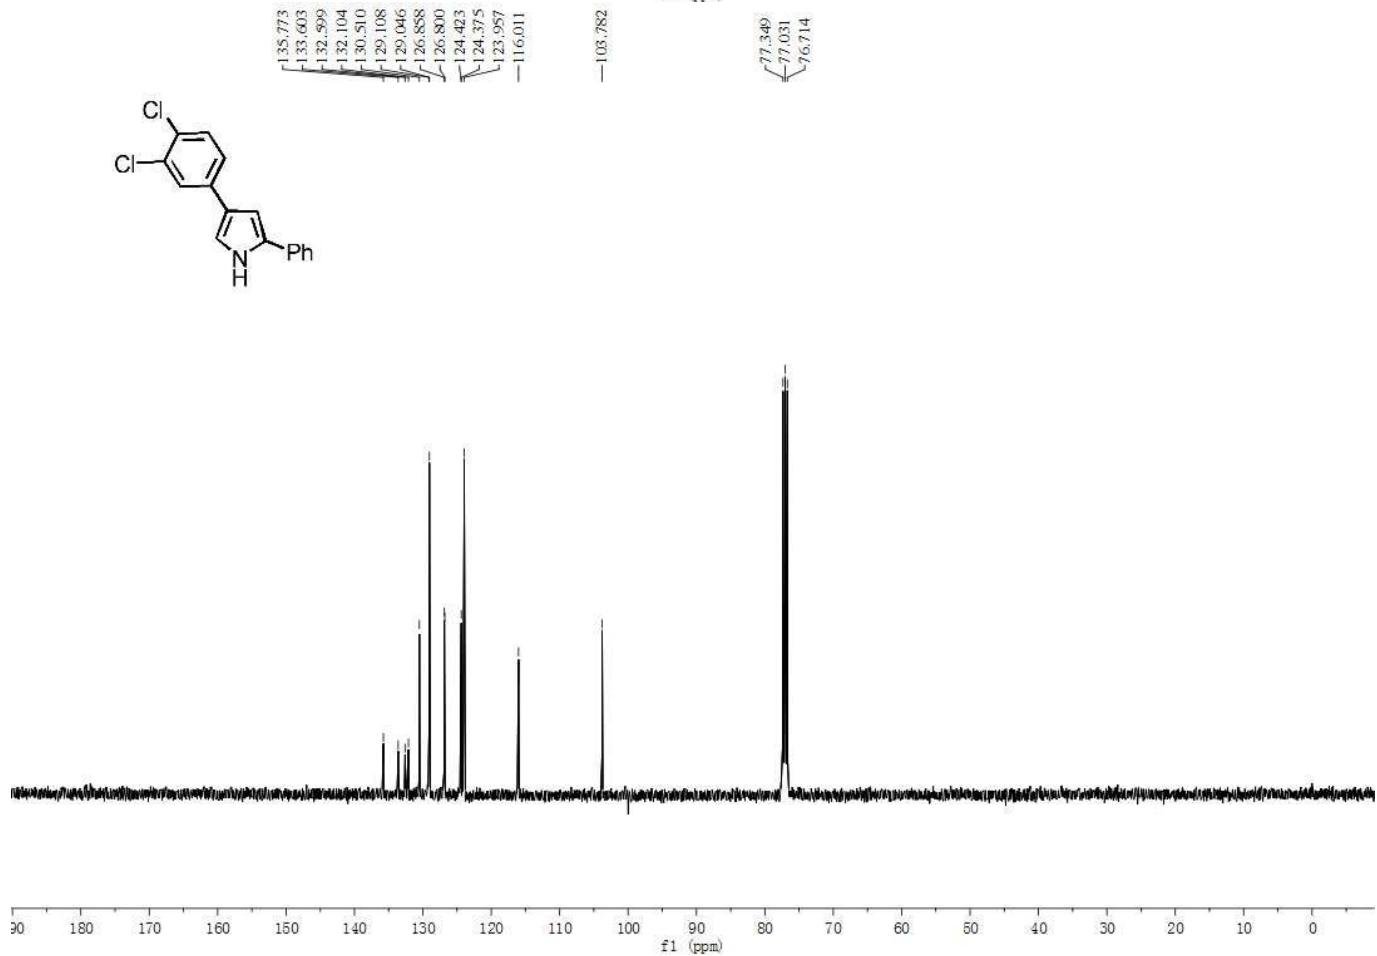

# $^1\text{H}$ and $^{13}\text{C}$ NMR Spectra of 2n

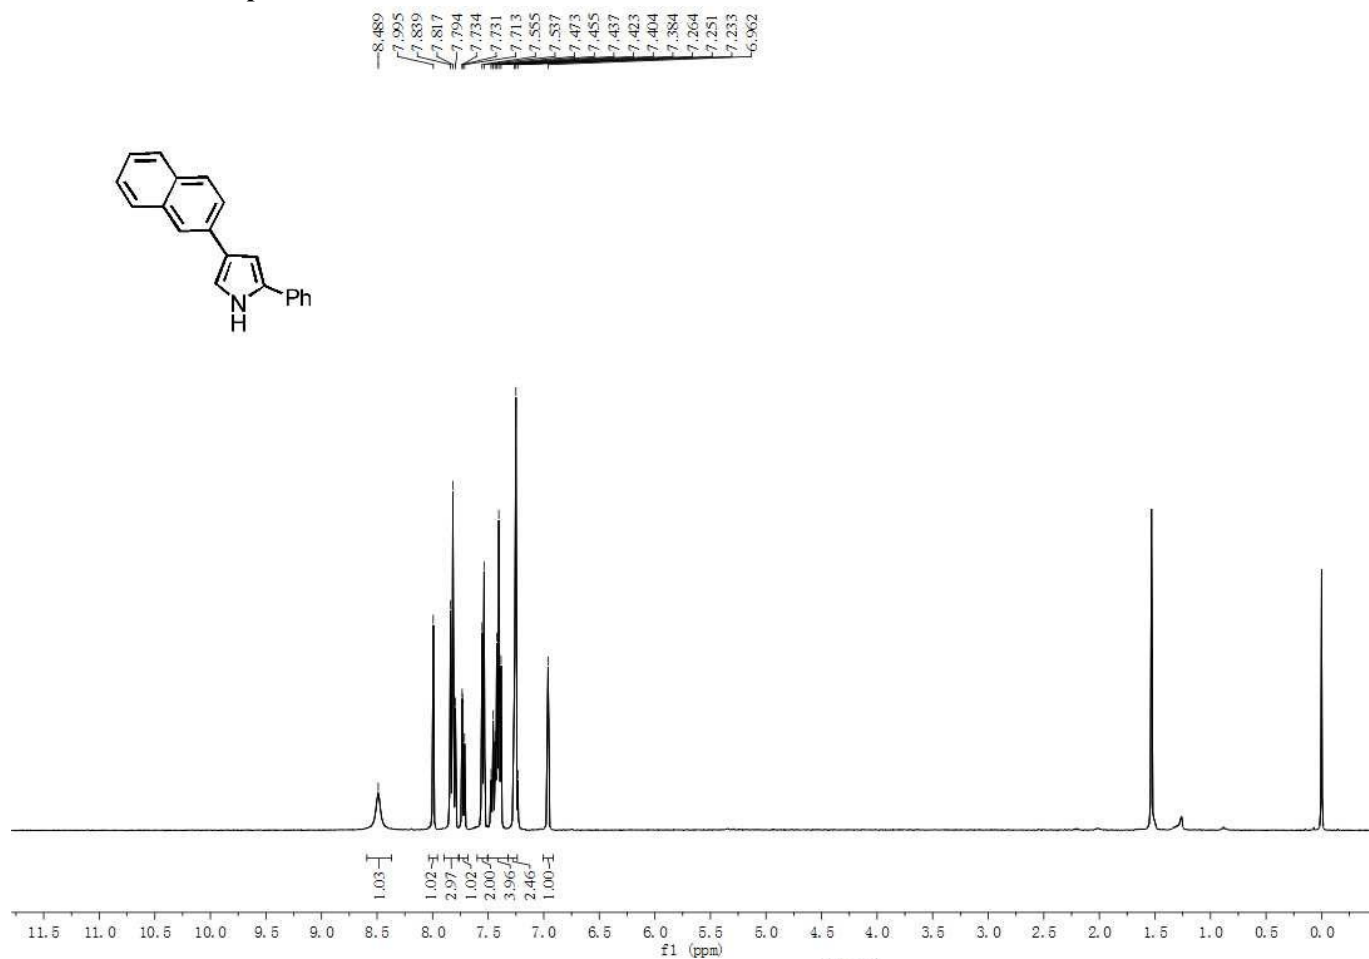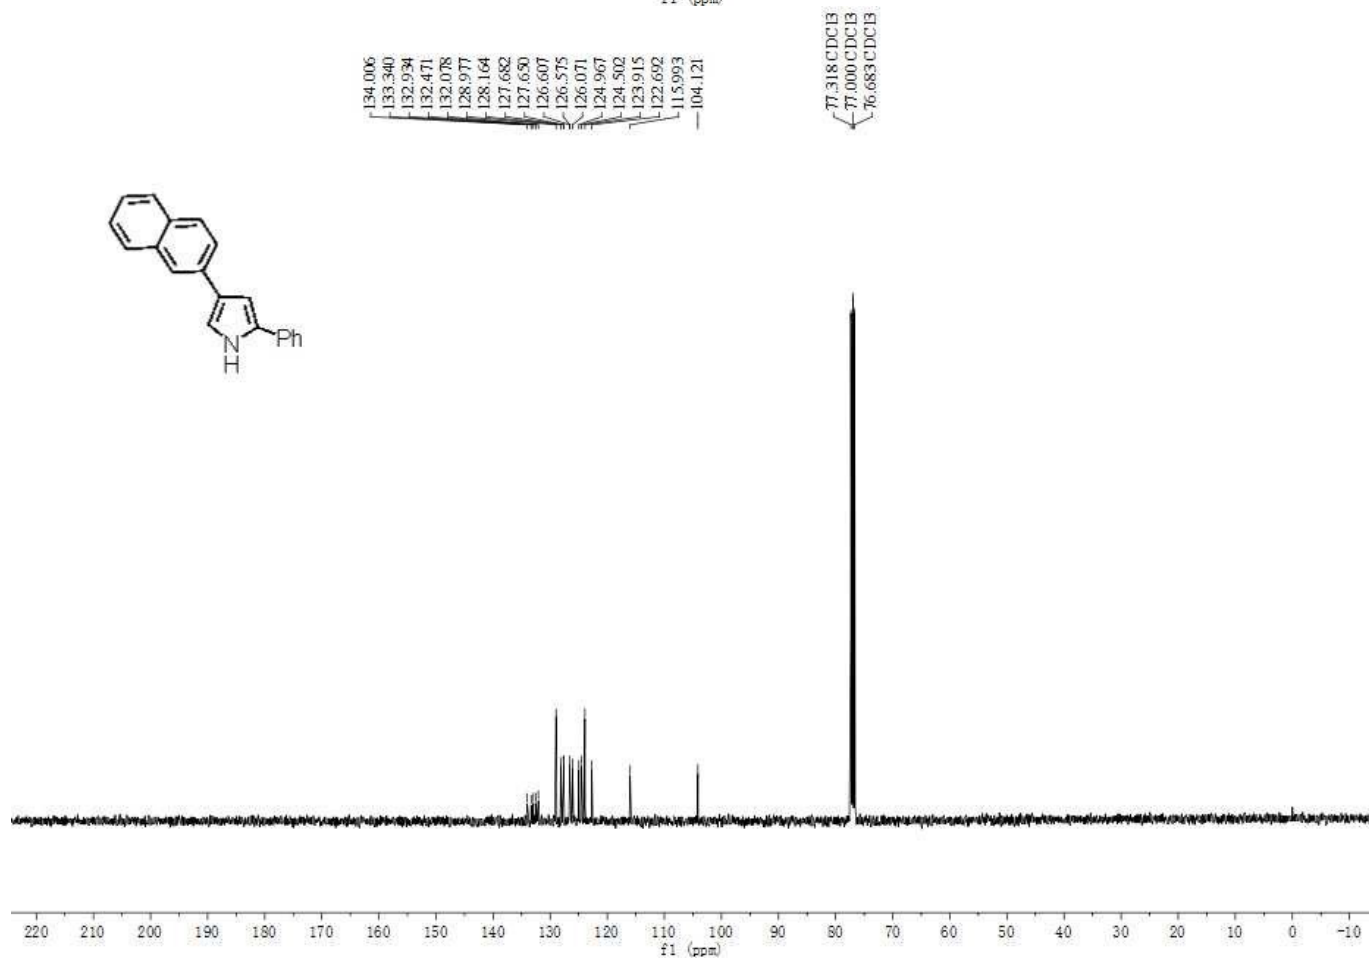

# <sup>1</sup>H and <sup>13</sup>C NMR Spectra of 2o

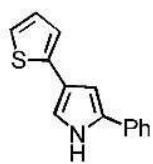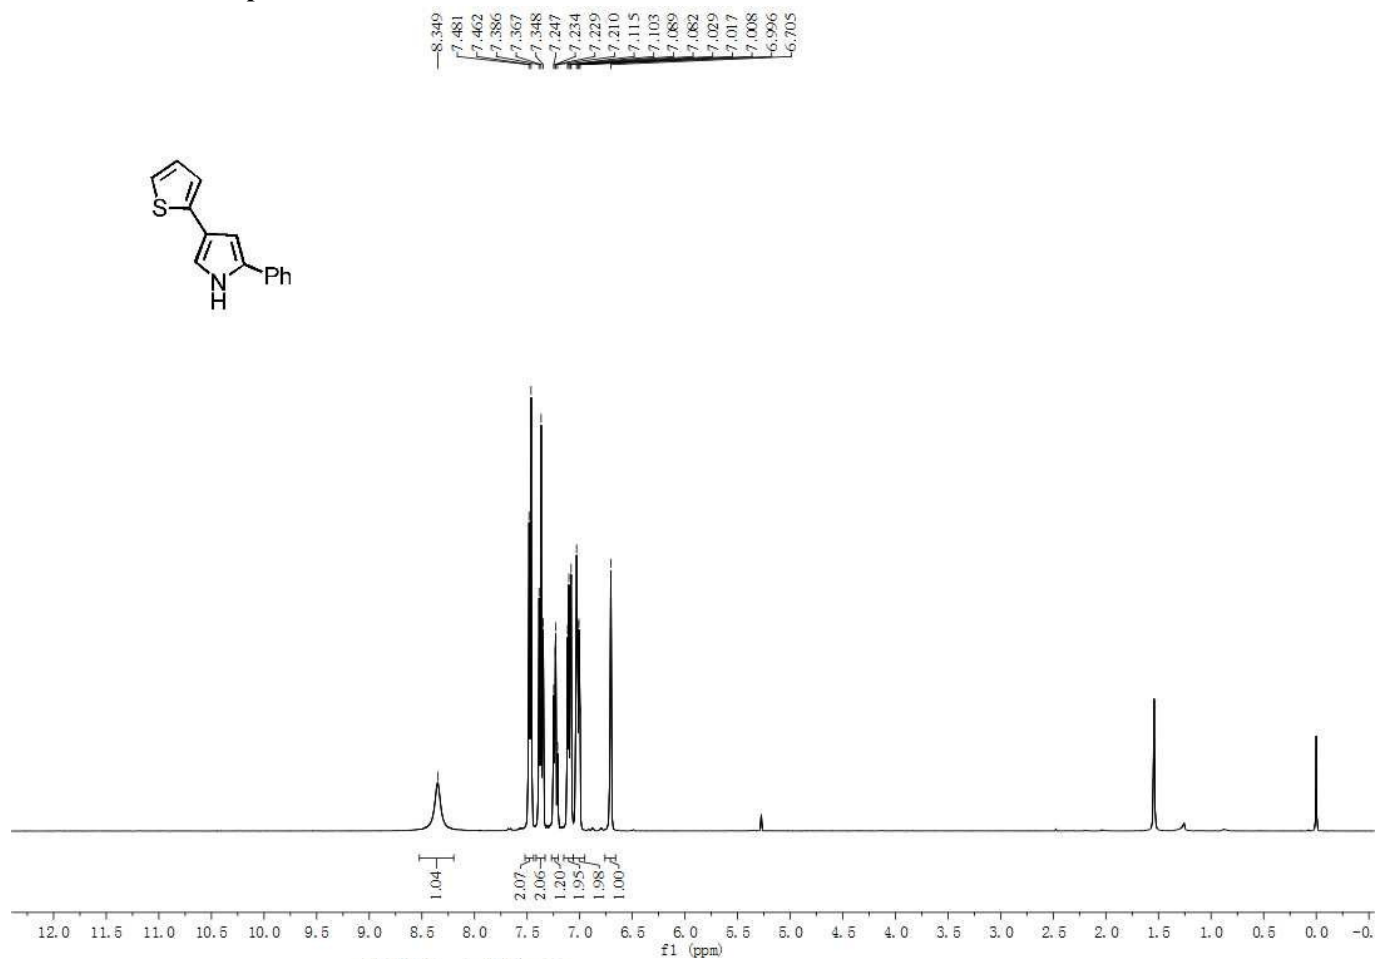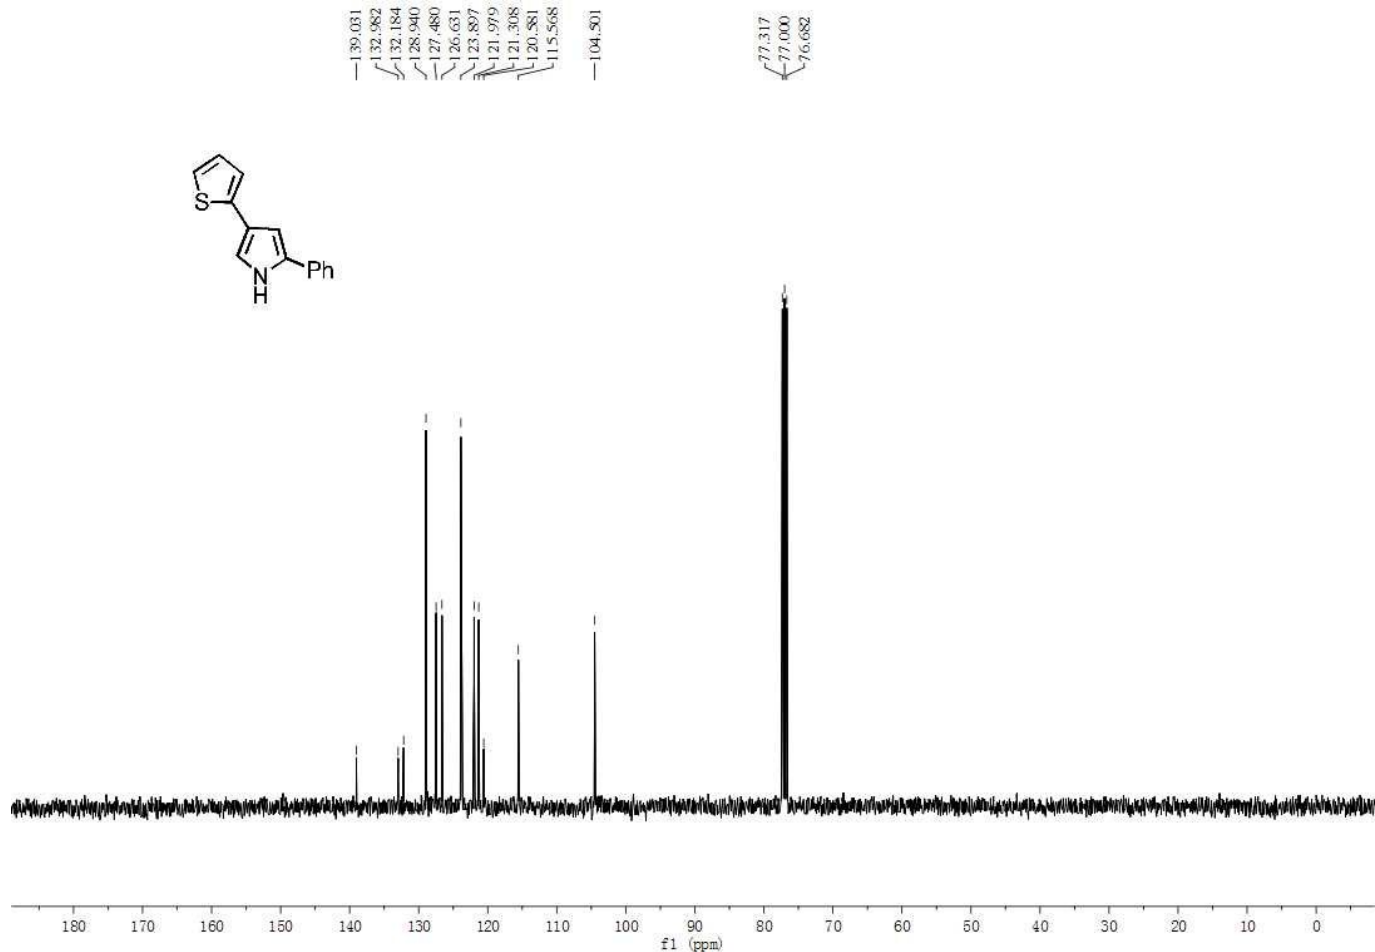

# <sup>1</sup>H and <sup>13</sup>C NMR Spectra of 2p

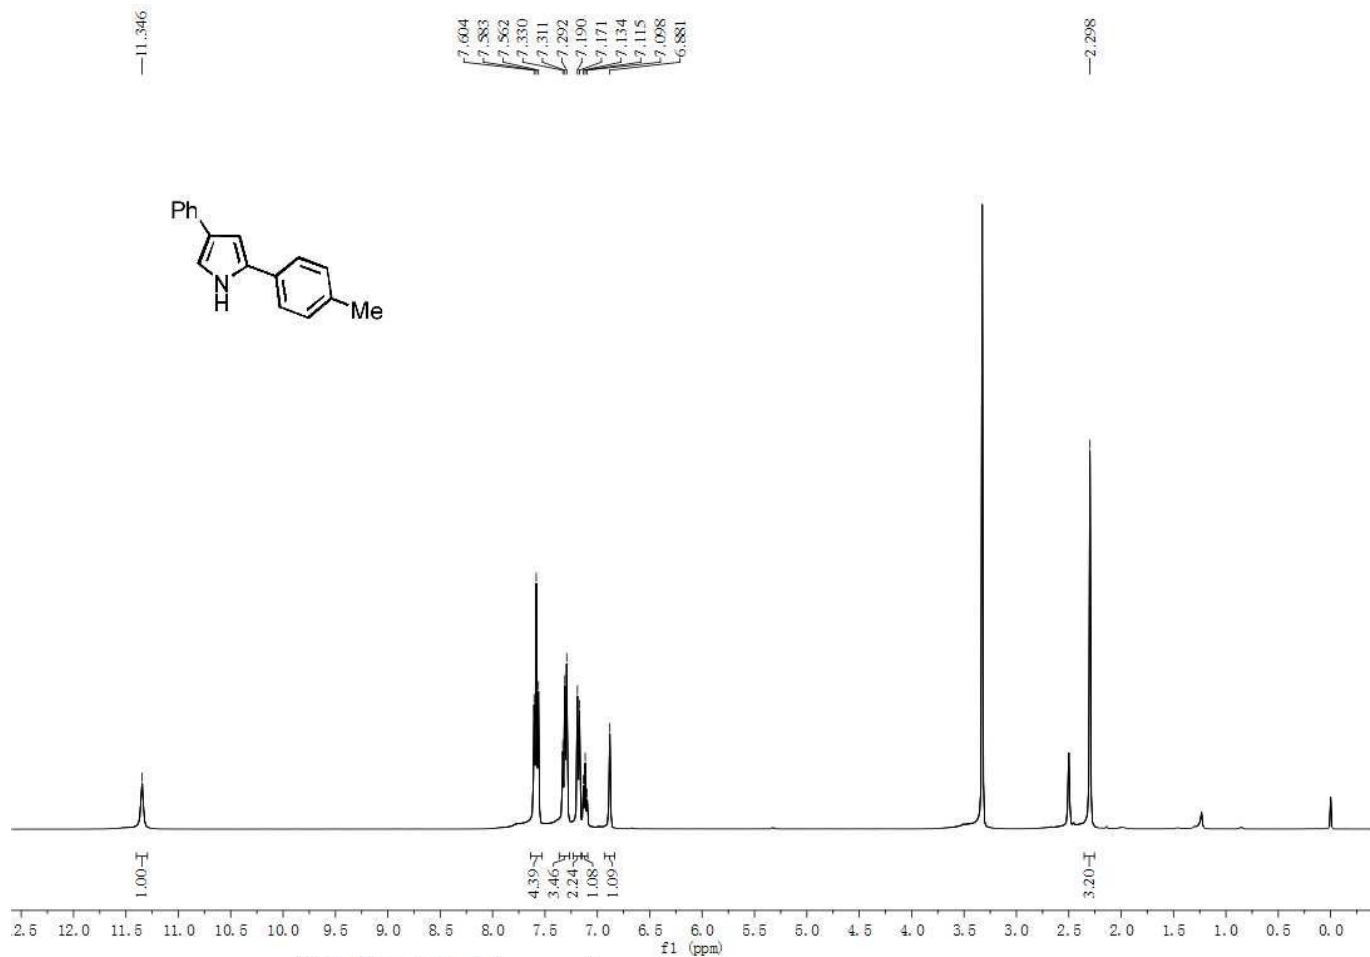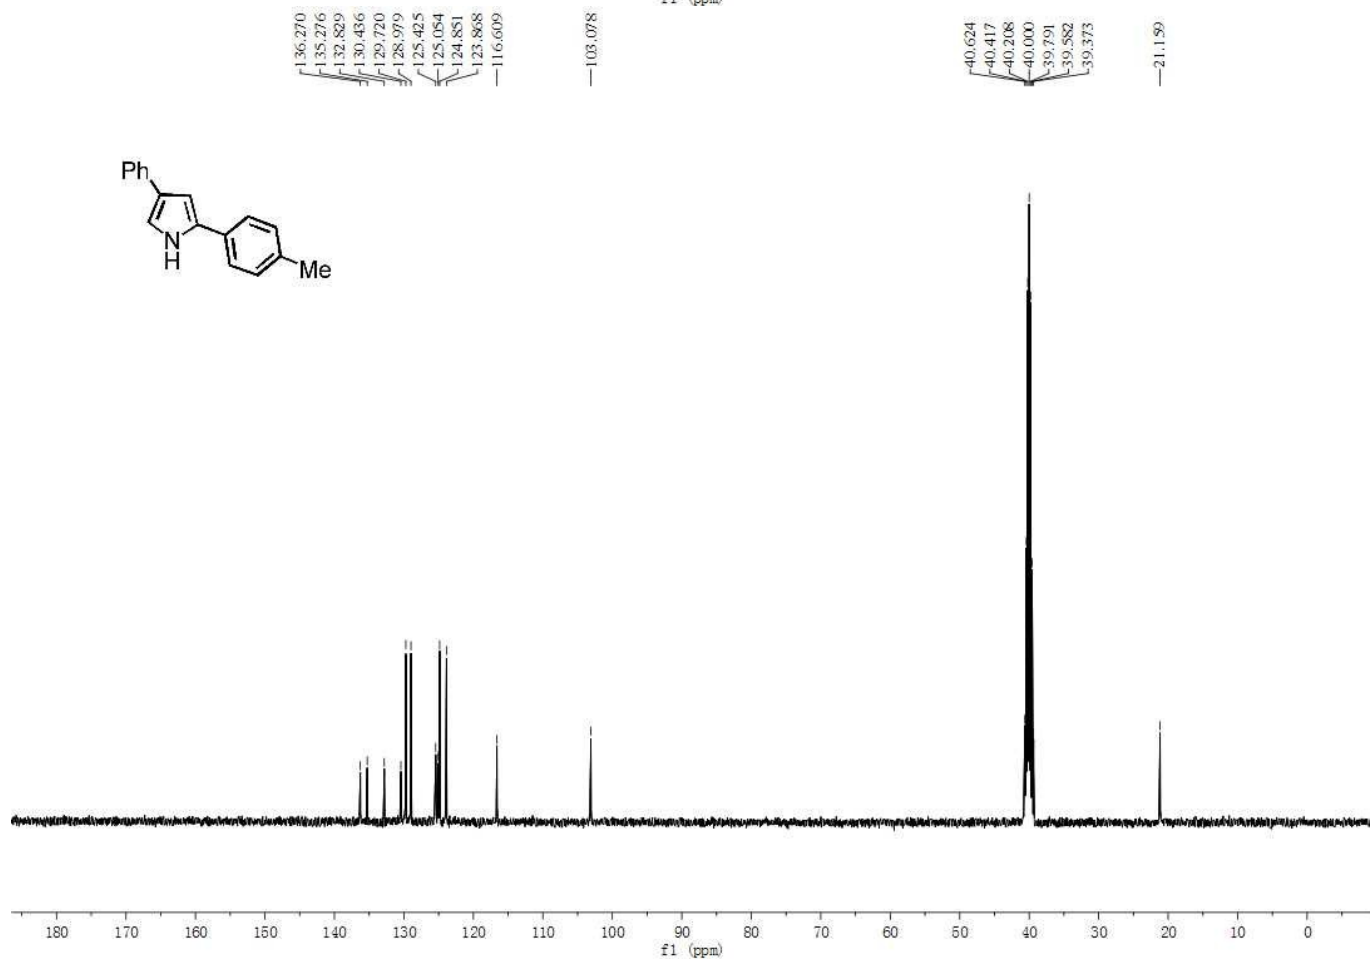

# <sup>1</sup>H and <sup>13</sup>C NMR Spectra of 2q

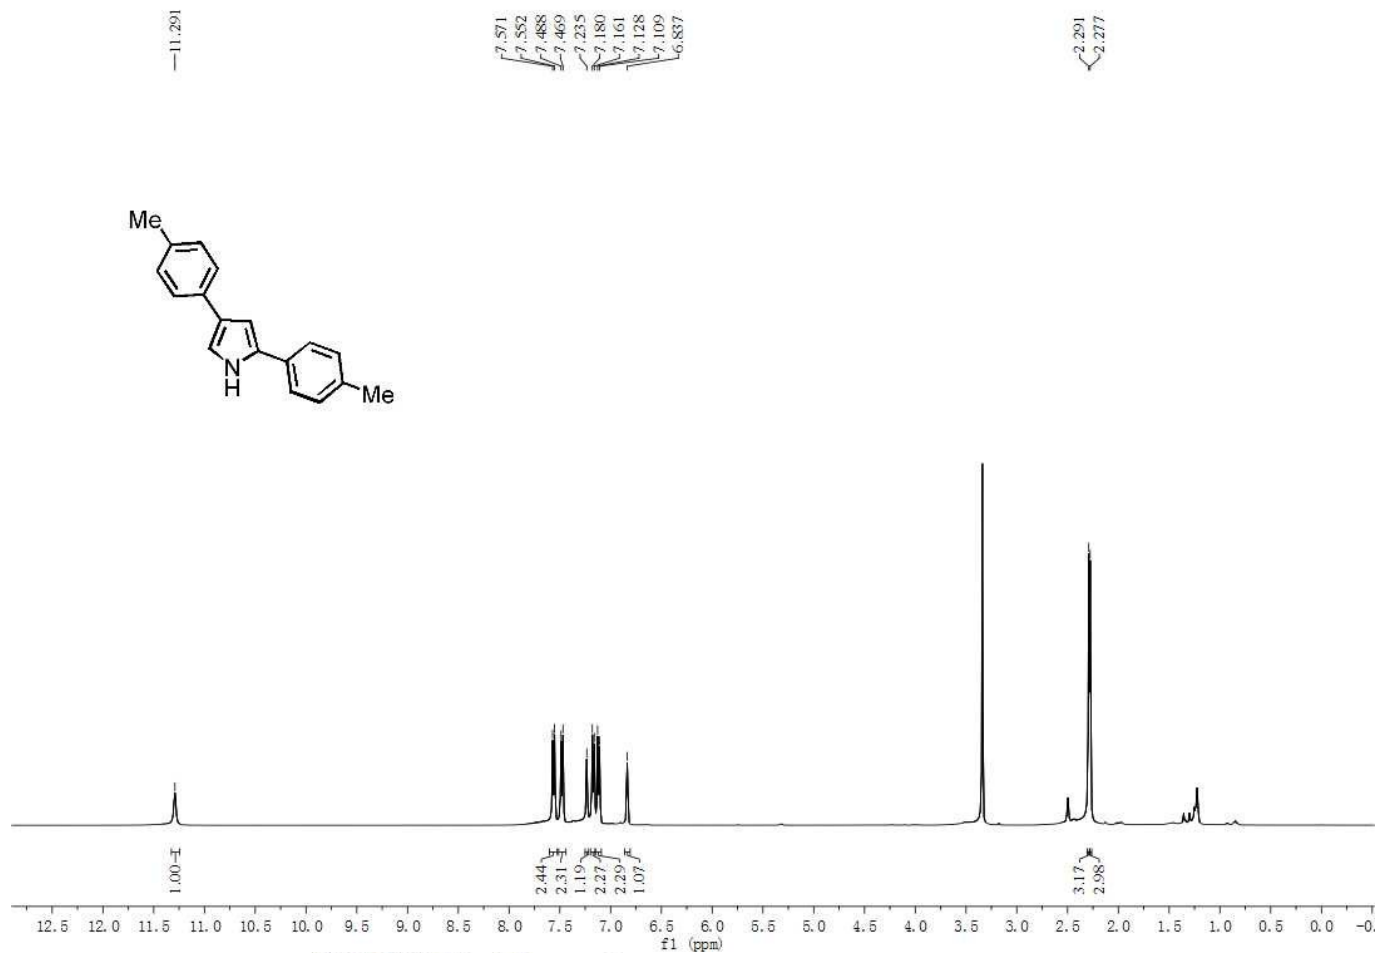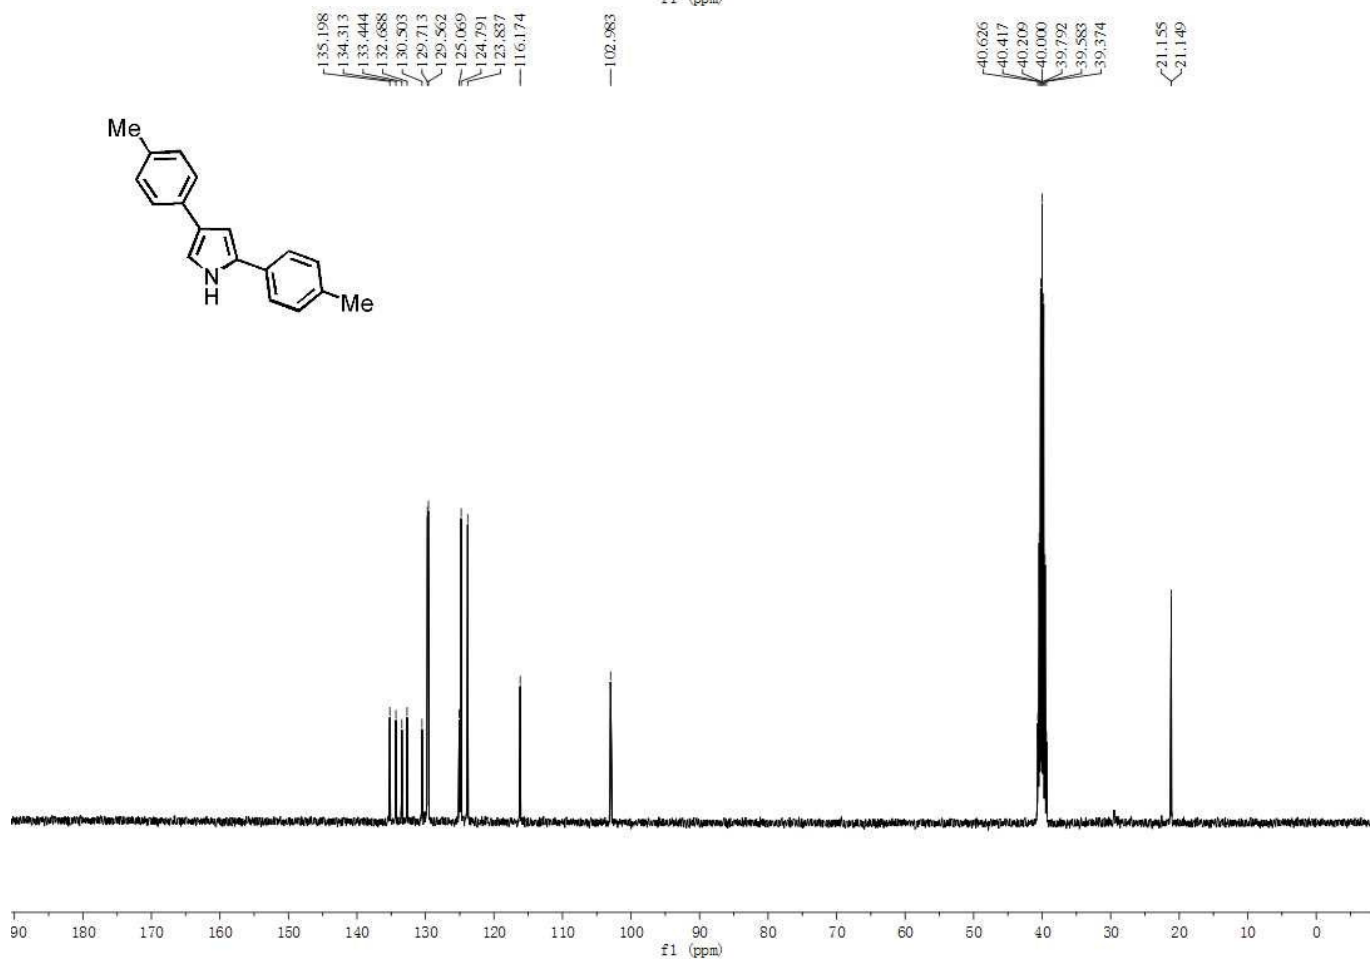

# <sup>1</sup>H and <sup>13</sup>C NMR Spectra of 2r

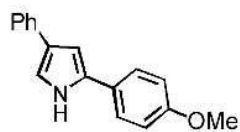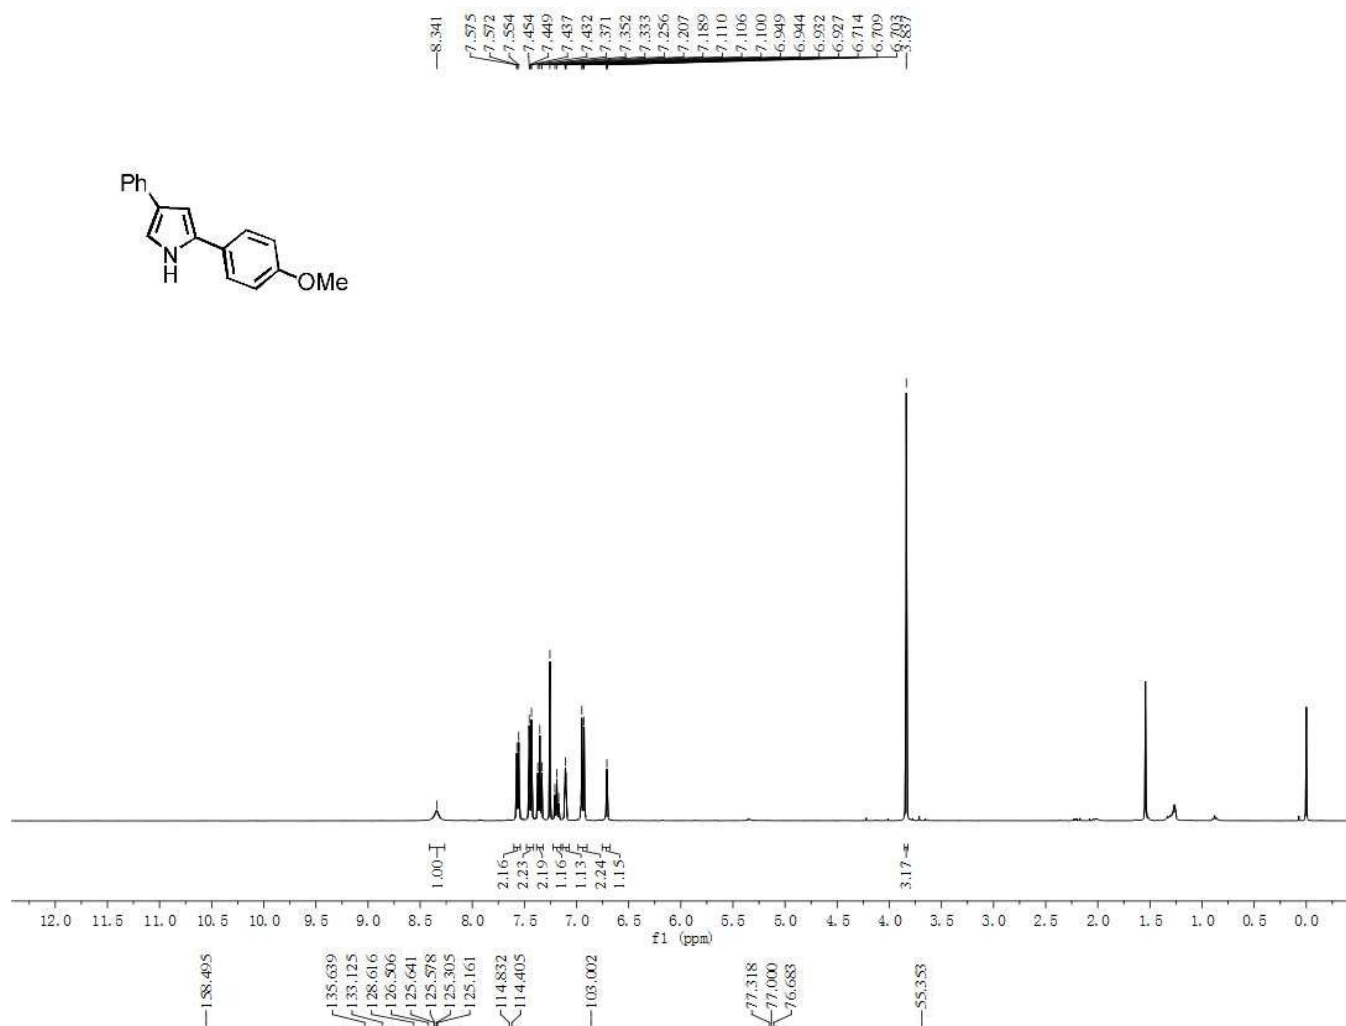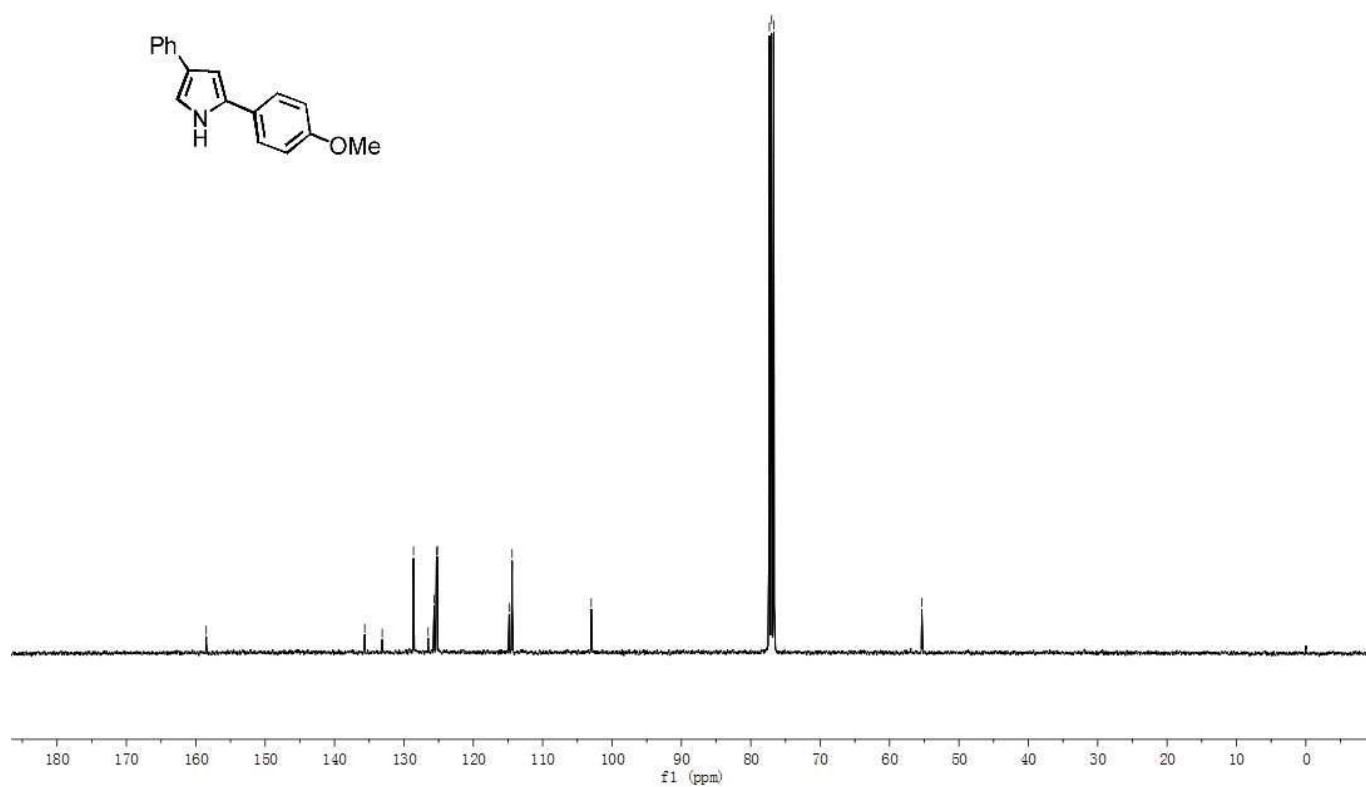

# <sup>1</sup>H, <sup>13</sup>C and <sup>19</sup>F NMR Spectra of 2s

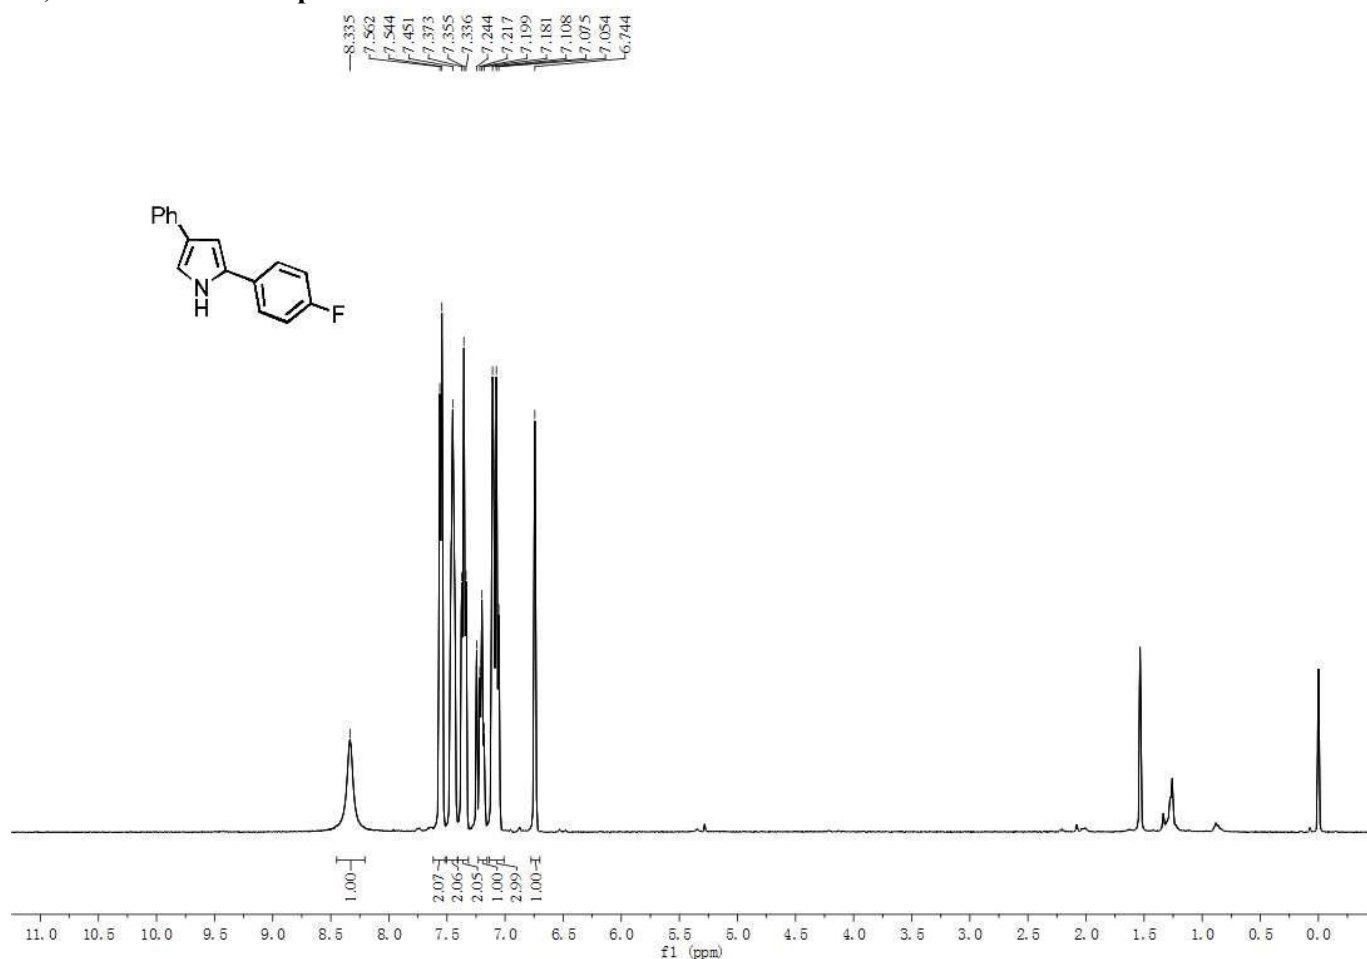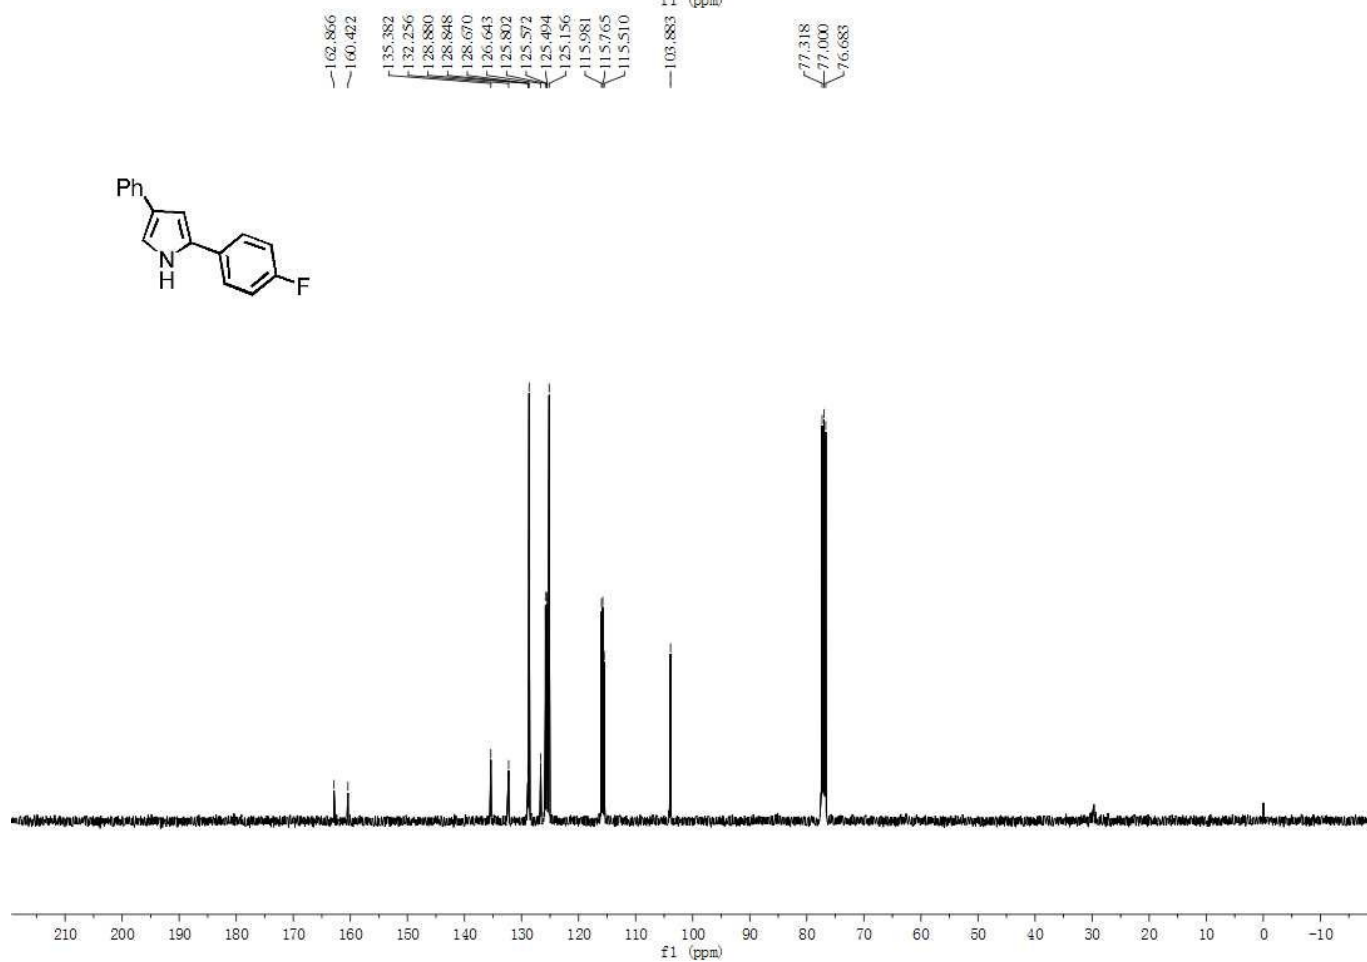

115.712  
115.726  
115.735  
115.748  
115.762  
115.770  
115.784

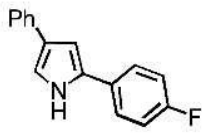

A (m)  
-115.75

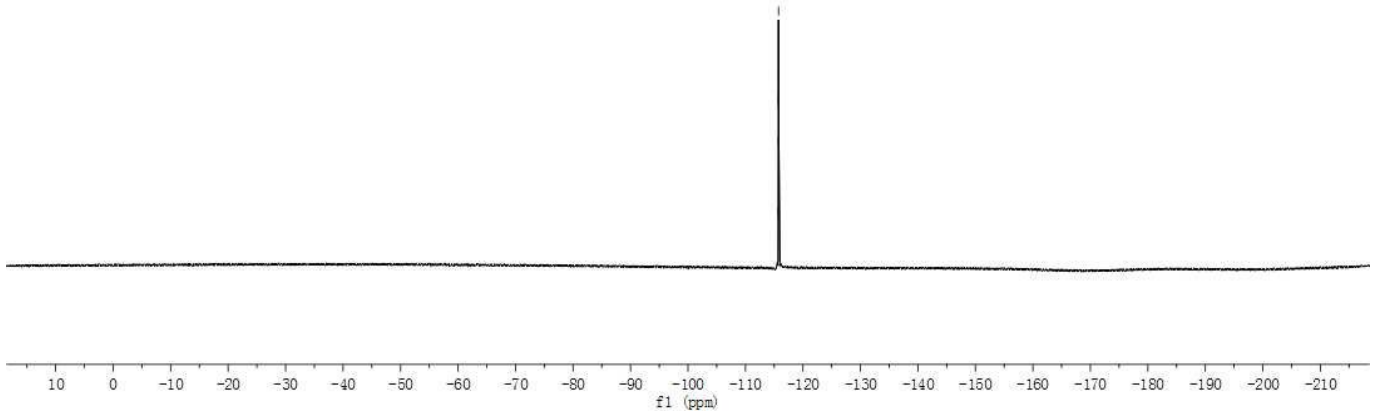



# <sup>1</sup>H and <sup>13</sup>C NMR Spectra of 2t

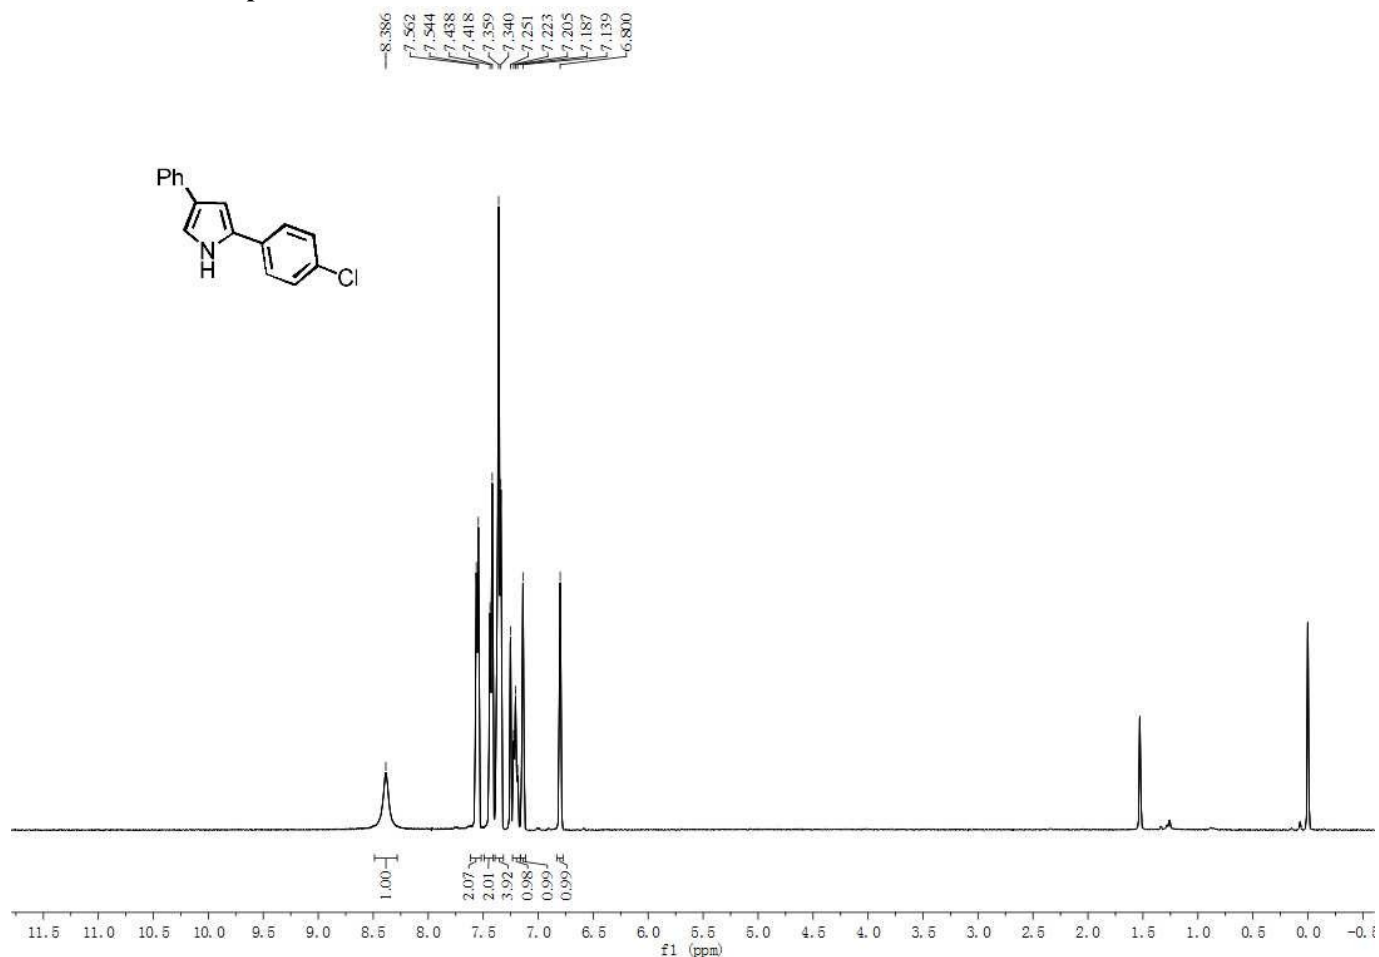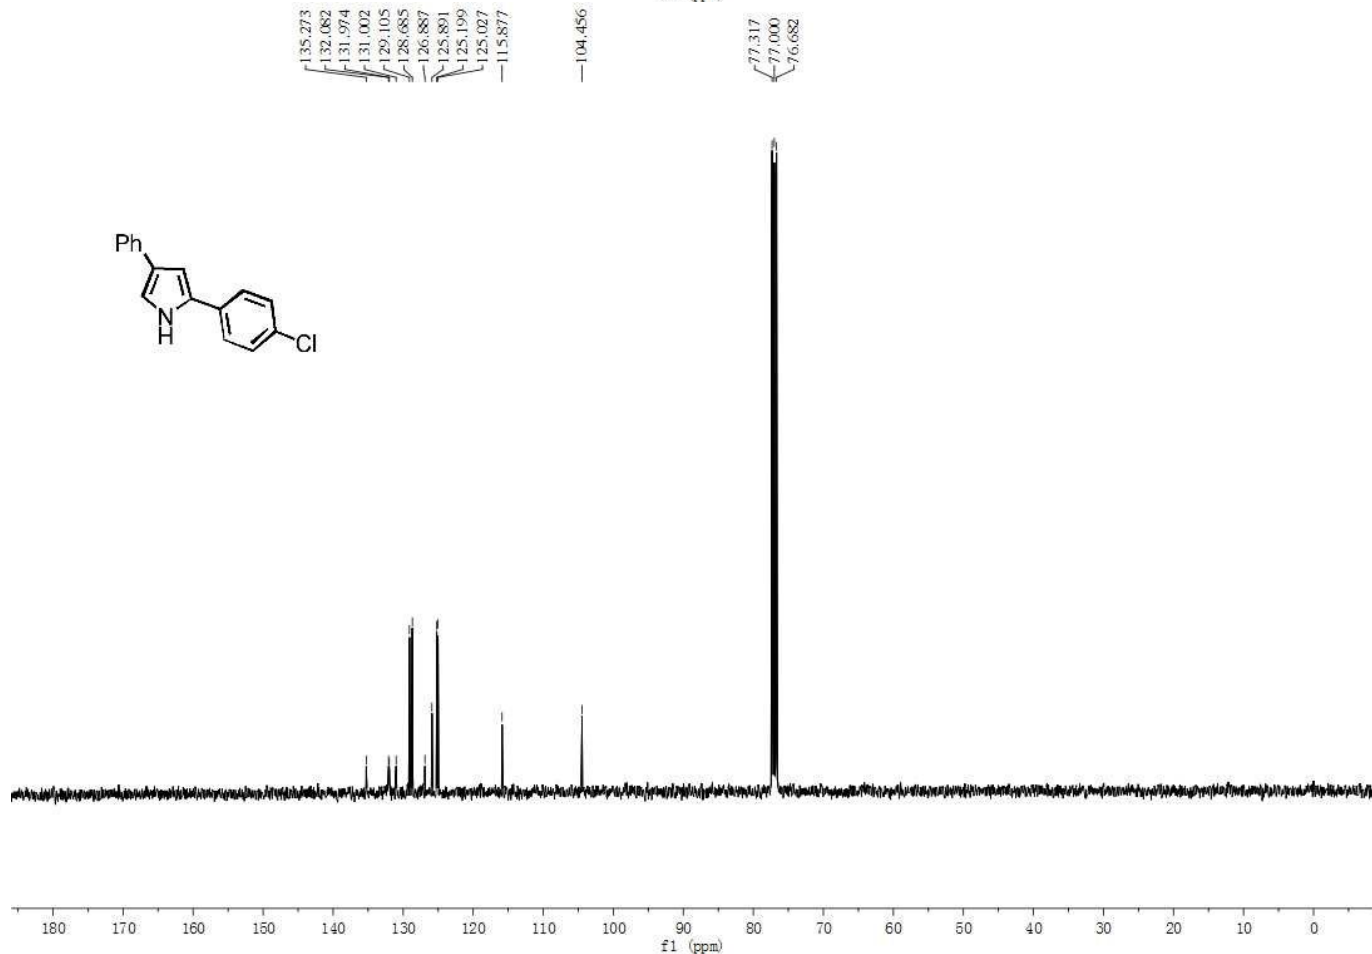

# <sup>1</sup>H and <sup>13</sup>C NMR Spectra of 2u

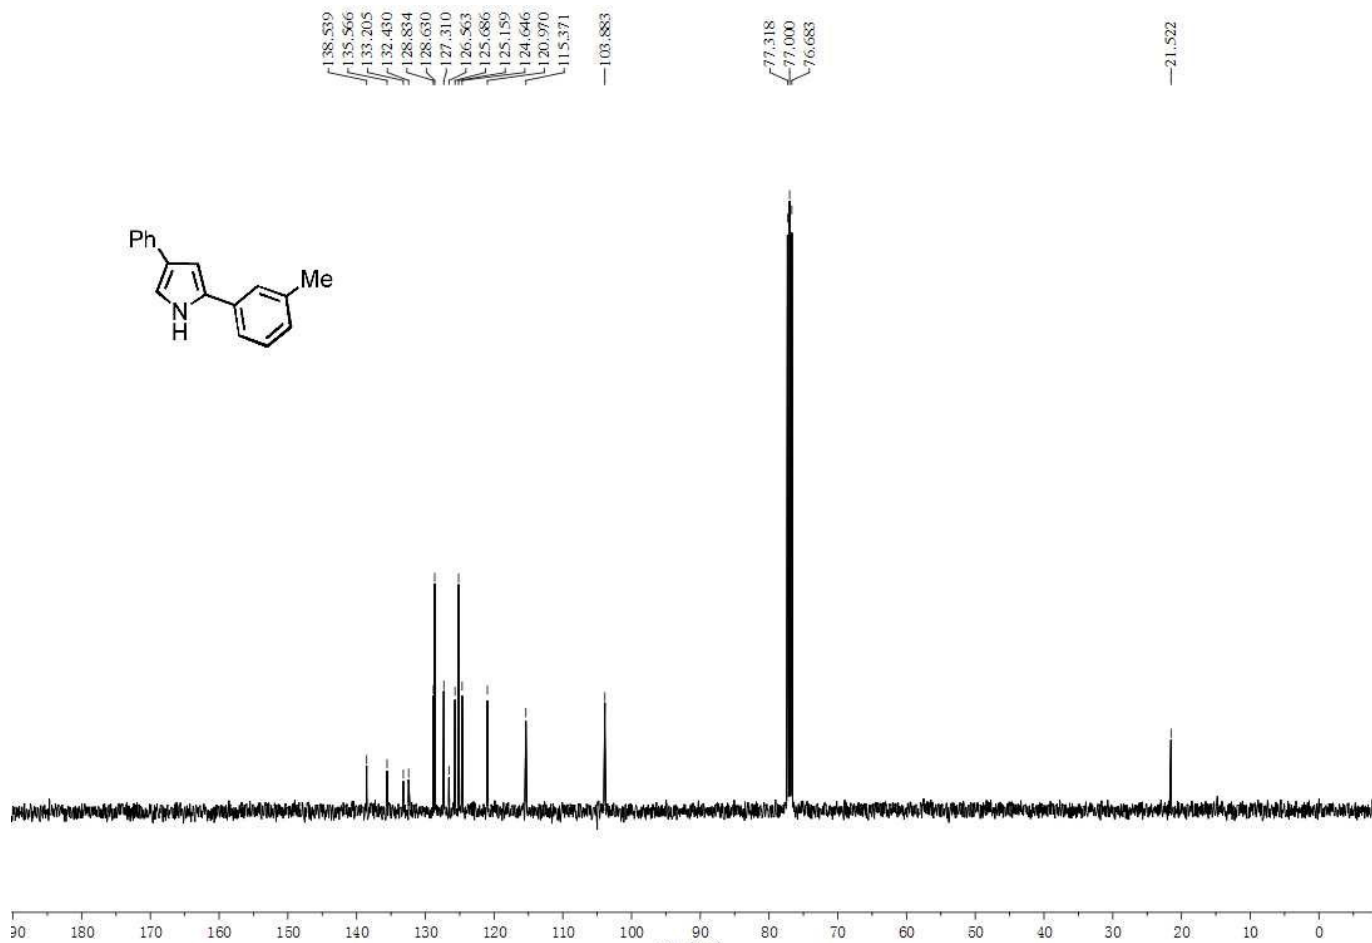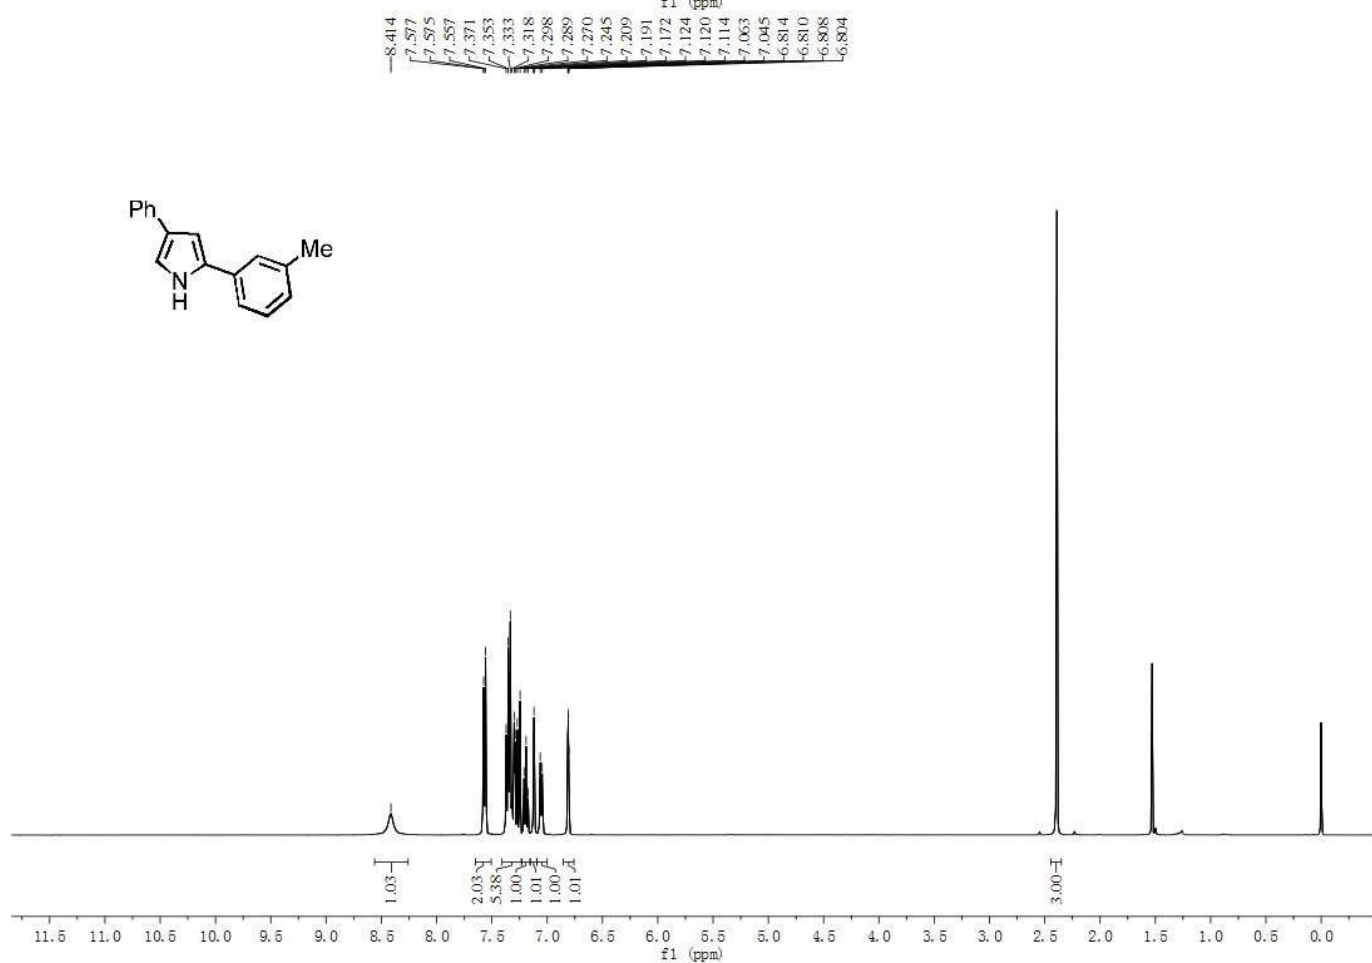

# <sup>1</sup>H and <sup>13</sup>C NMR Spectra of 2v

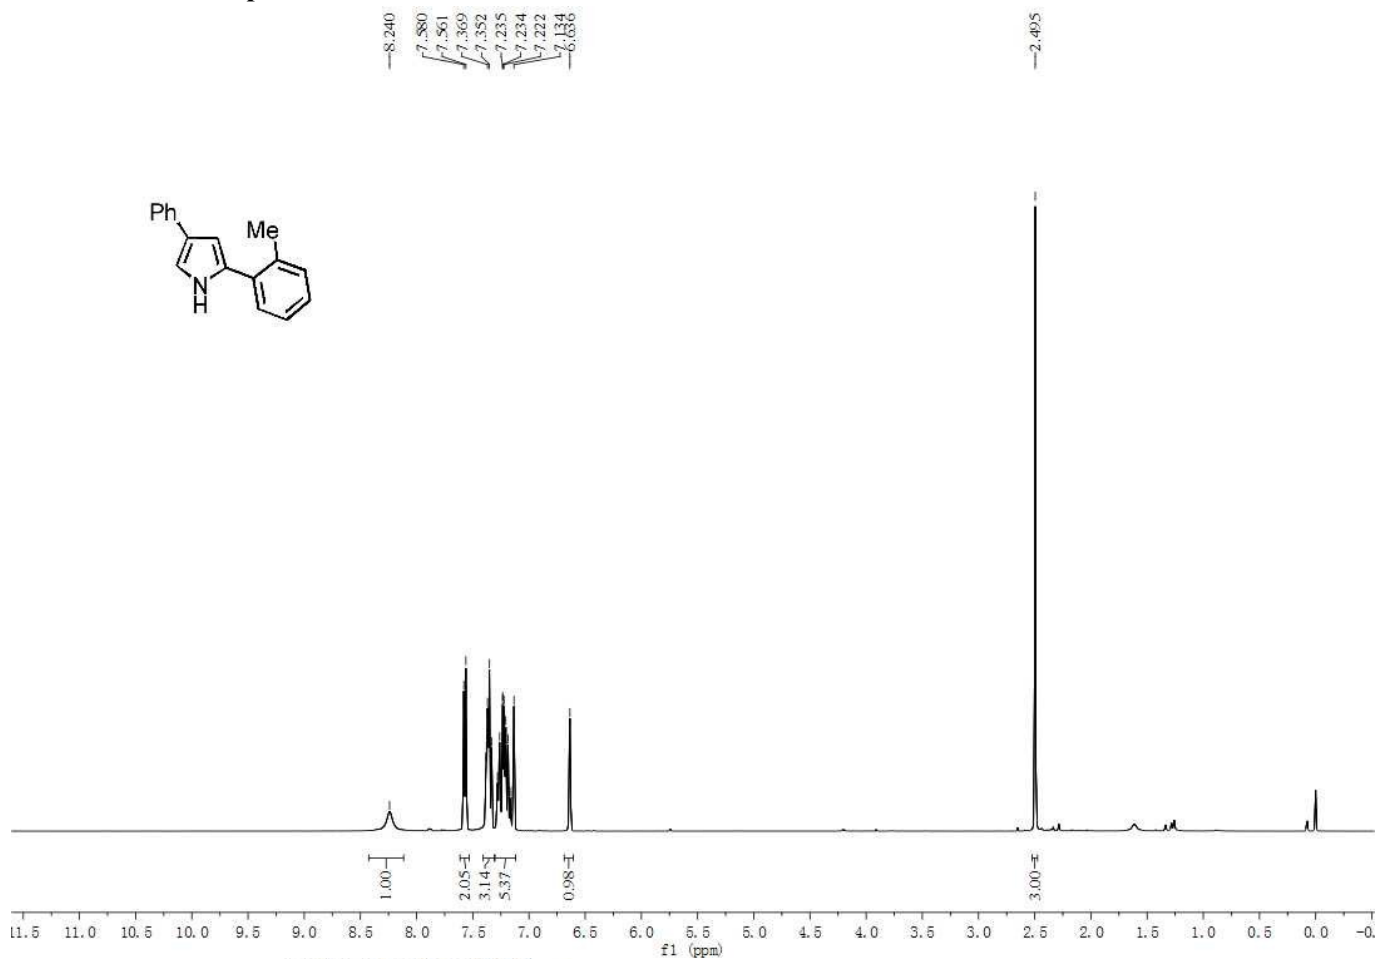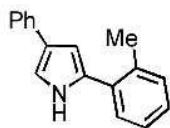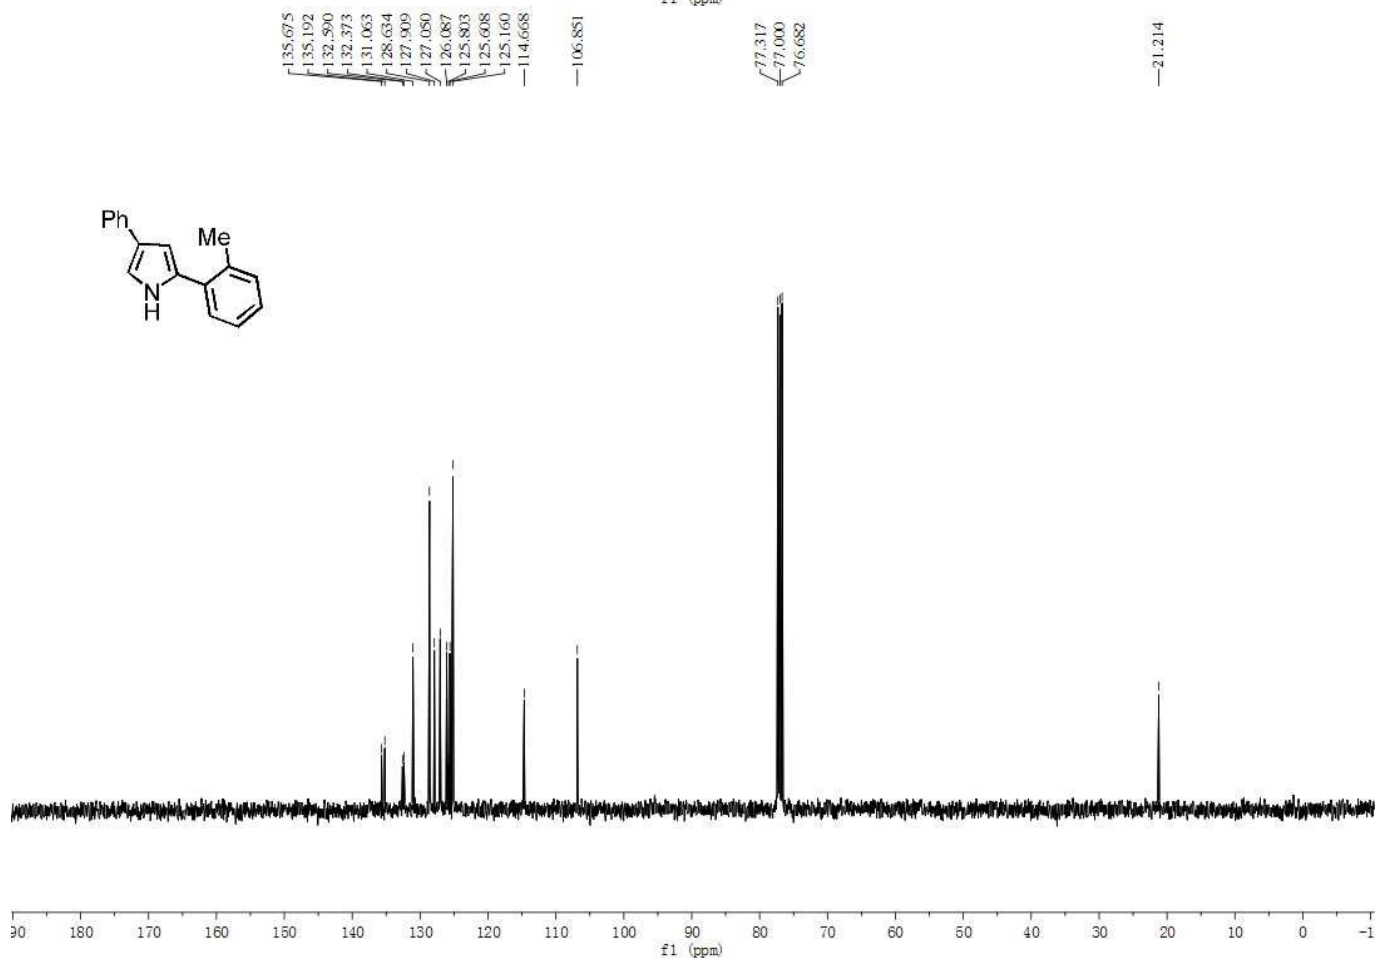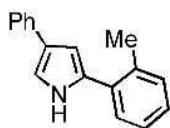

# <sup>1</sup>H and <sup>13</sup>C NMR Spectra of 3e

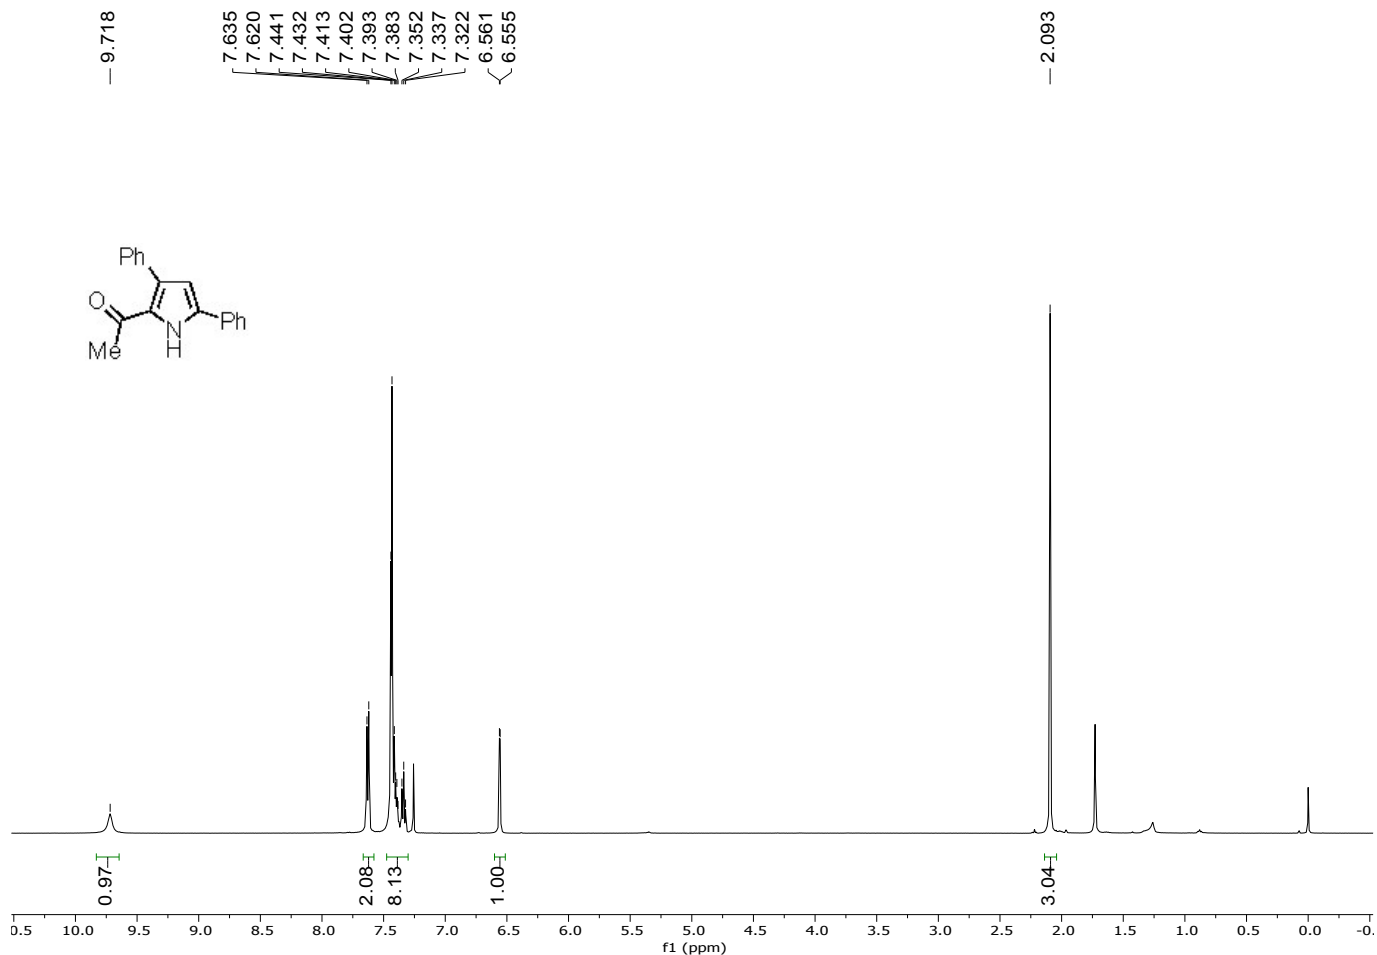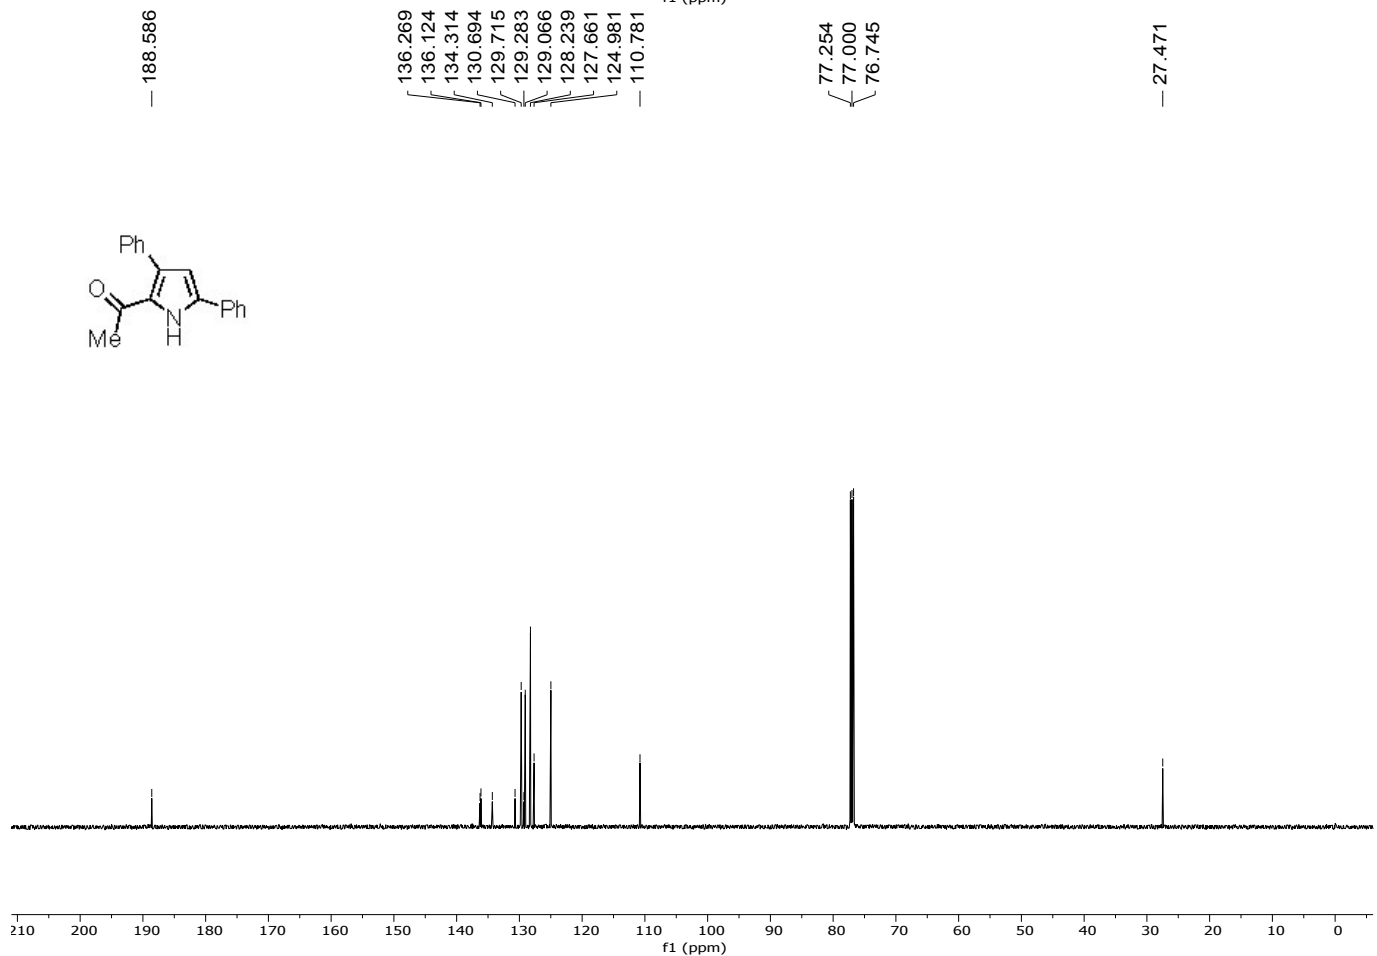

# <sup>1</sup>H and <sup>13</sup>C NMR Spectra of 4

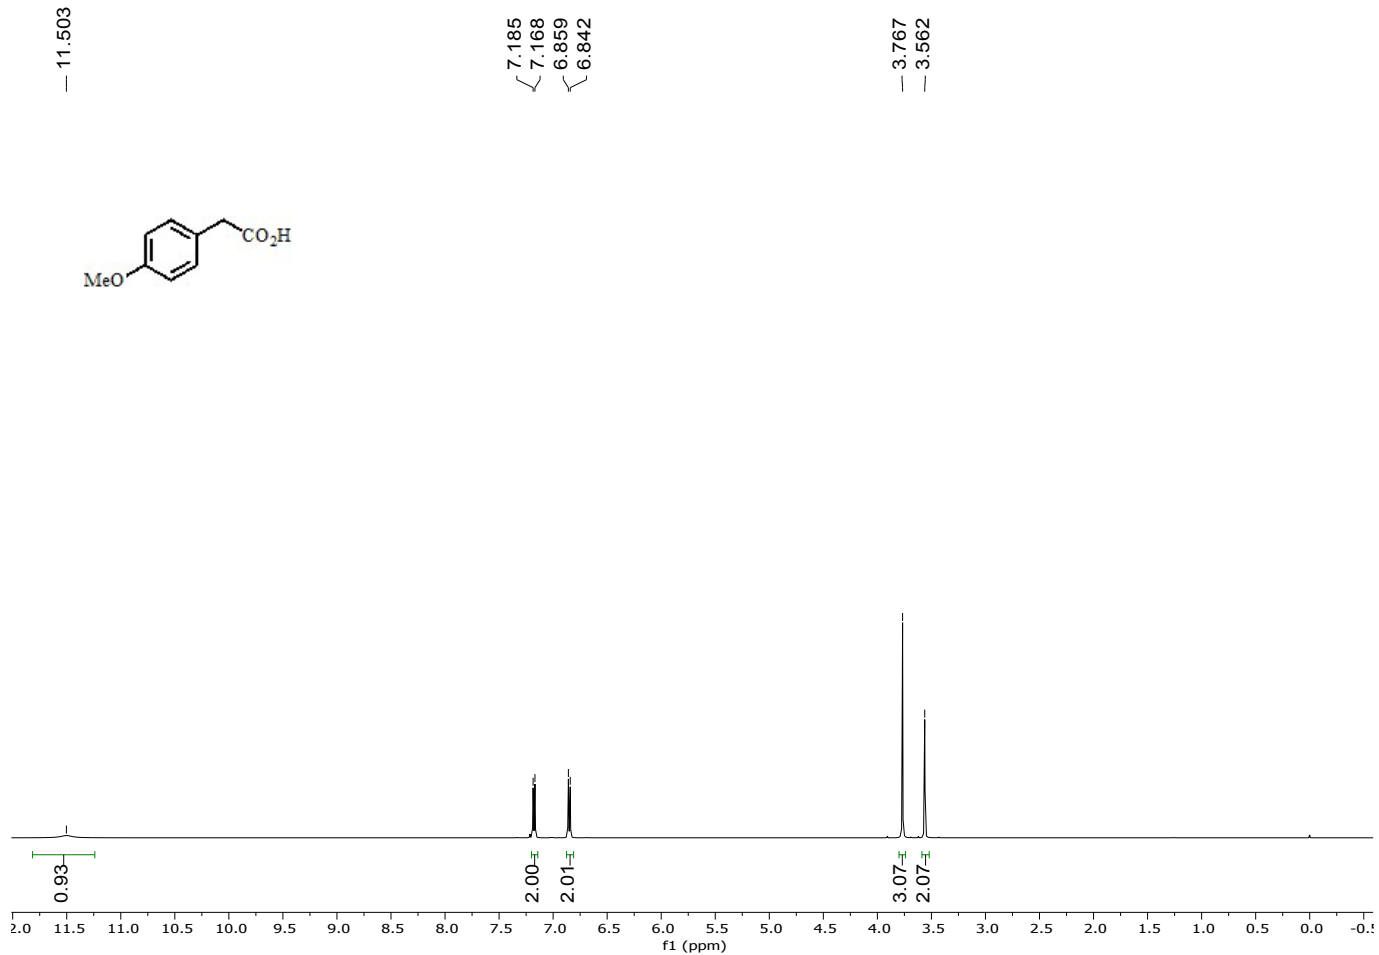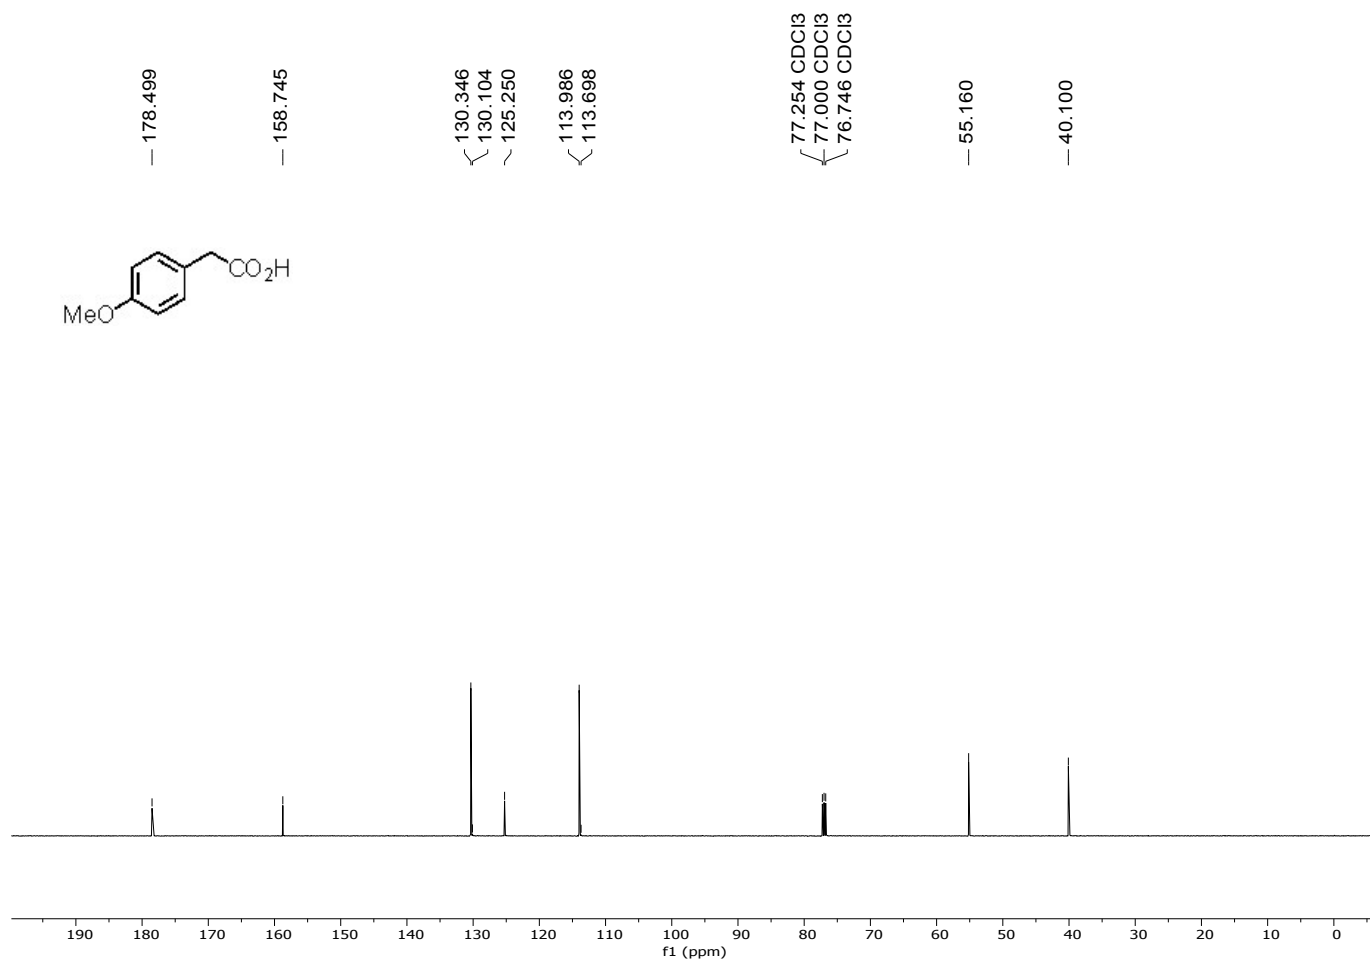

# <sup>1</sup>H and <sup>13</sup>C NMR Spectra of 5

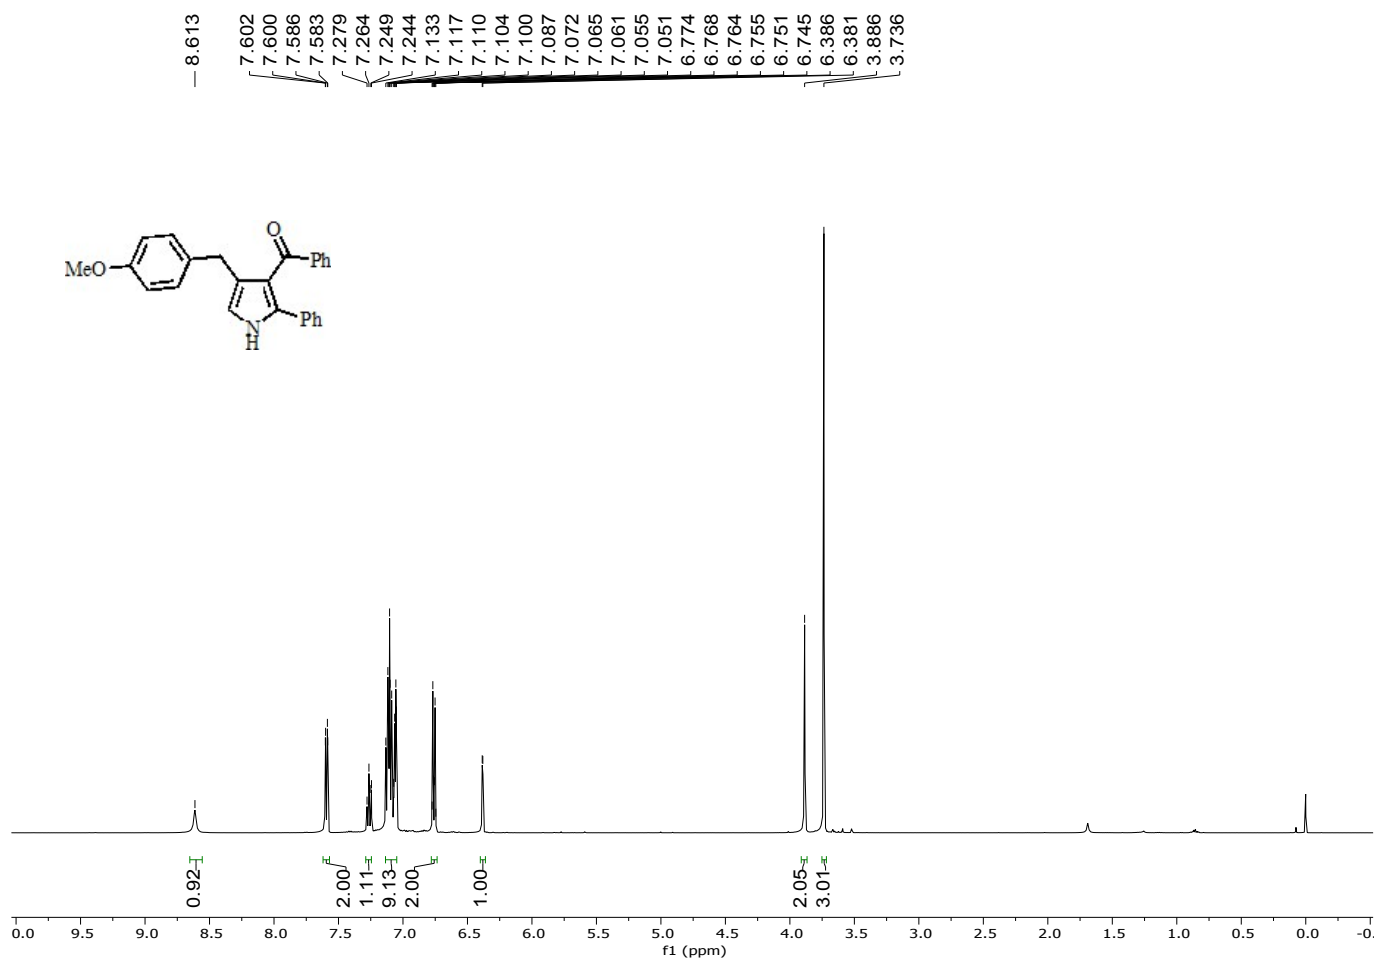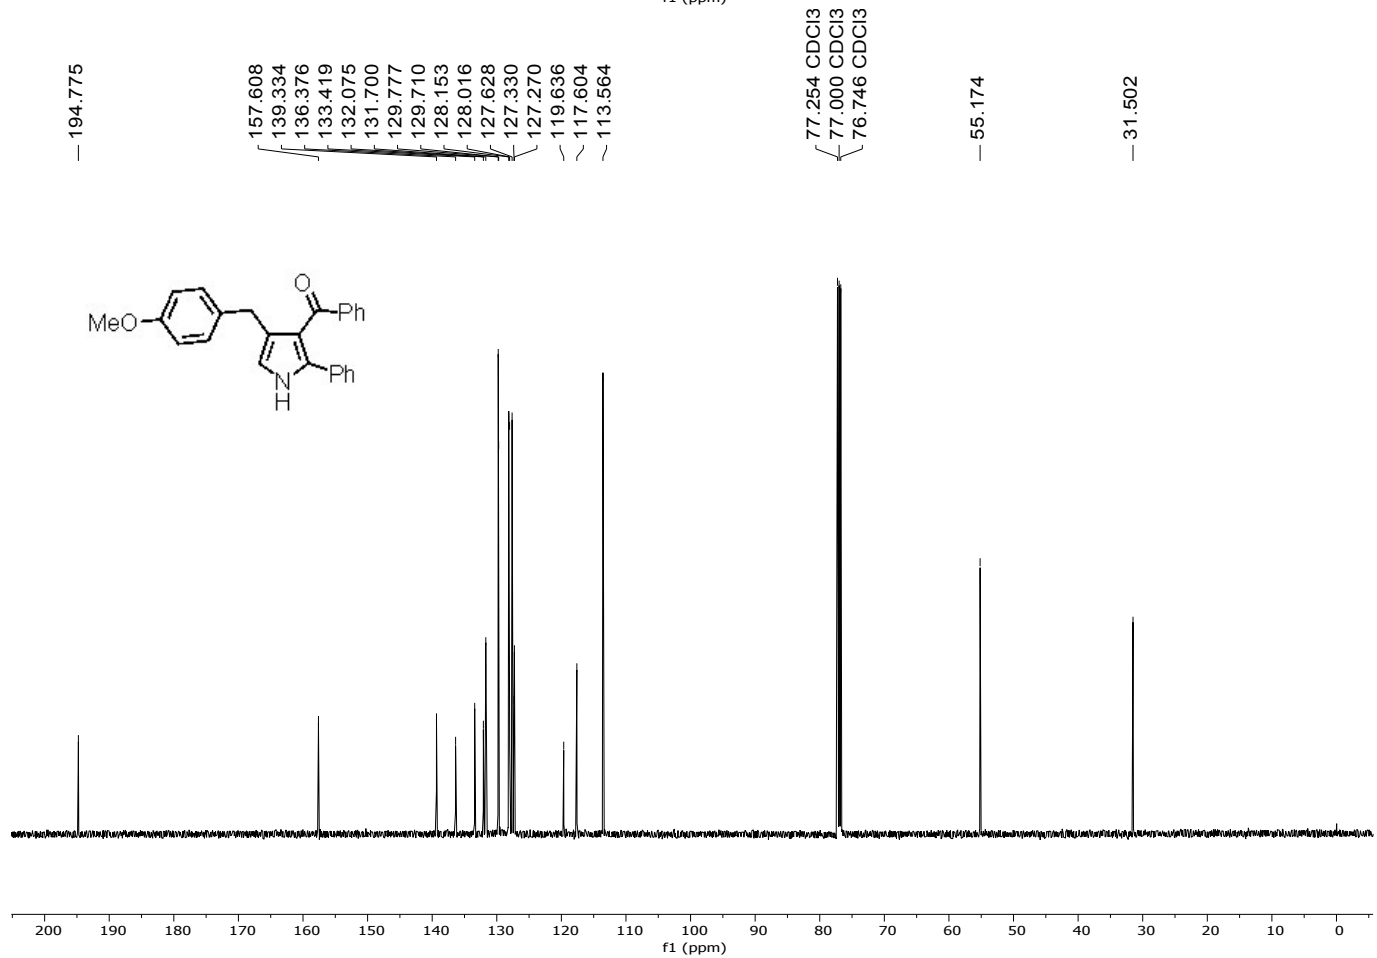

Supplement: c8gc01675e1.pdf [file c8gc01675e1.pdf]
